# Supplementary material for: Rate of normal lung function decline in ageing adults: a systematic review of prospective cohort studies
Source: PubMed Central journal article supplement — BMJ Open. 2019 Jun 27;9(6):e028150. doi: 10.1136/bmjopen-2018-028150 (PMC6597635; doi:10.1136/bmjopen-2018-028150), 2019-06-27
Supplement: bmjopen-2018-028150.draft_revisions.pdf [file bmjopen-2018-028150.draft_revisions.pdf]

# BMJ Open

BMJ Open is committed to open peer review. As part of this commitment we make the peer review history of every article we publish publicly available.

When an article is published we post the peer reviewers' comments and the authors' responses online. We also post the versions of the paper that were used during peer review. These are the versions that the peer review comments apply to.

The versions of the paper that follow are the versions that were submitted during the peer review process. They are not the versions of record or the final published versions. They should not be cited or distributed as the published version of this manuscript.

BMJ Open is an open access journal and the full, final, typeset and author-corrected version of record of the manuscript is available on our site with no access controls, subscription charges or pay-per-view fees (<http://bmjopen.bmj.com>).

If you have any questions on BMJ Open's open peer review process please email [info.bmjopen@bmj.com](mailto:info.bmjopen@bmj.com)

# BMJ Open

## The rate of normal lung function decline in ageing adults: a systematic review of prospective cohort studies

|                               |                                                                                                                                                                                                                                                                                                                                                                                                                                                                                                                                                                                                                                                                                                                                |
|-------------------------------|--------------------------------------------------------------------------------------------------------------------------------------------------------------------------------------------------------------------------------------------------------------------------------------------------------------------------------------------------------------------------------------------------------------------------------------------------------------------------------------------------------------------------------------------------------------------------------------------------------------------------------------------------------------------------------------------------------------------------------|
| Journal:                      | <i>BMJ Open</i>                                                                                                                                                                                                                                                                                                                                                                                                                                                                                                                                                                                                                                                                                                                |
| Manuscript ID                 | bmjopen-2018-028150                                                                                                                                                                                                                                                                                                                                                                                                                                                                                                                                                                                                                                                                                                            |
| Article Type:                 | Research                                                                                                                                                                                                                                                                                                                                                                                                                                                                                                                                                                                                                                                                                                                       |
| Date Submitted by the Author: | 23-Nov-2018                                                                                                                                                                                                                                                                                                                                                                                                                                                                                                                                                                                                                                                                                                                    |
| Complete List of Authors:     | Thomas, Elizabeth; Bond University Faculty of Health Sciences and Medicine, Faculty of Health Sciences and Medicine<br>Guppy, Michelle; Bond University Faculty of Health Sciences and Medicine, Centre for Research in Evidence-Based Practice; University of New England, School of Rural Medicine<br>Straus, Sharon; University of Toronto Department of Medicine; St. Michael's Hospital, Li Ka Shing Knowledge Institute<br>Bell, Katy; University of Sydney, School of Public Health; Bond University Faculty of Health Sciences and Medicine, Centre for Research in Evidence-Based Practice<br>Glasziou, Paul; Bond University Faculty of Health Sciences and Medicine, Centre for Research in Evidence-Based Practice |
| Keywords:                     | Ageing, age-related decline, lung function tests, cohort studies, systematic review                                                                                                                                                                                                                                                                                                                                                                                                                                                                                                                                                                                                                                            |
|                               |                                                                                                                                                                                                                                                                                                                                                                                                                                                                                                                                                                                                                                                                                                                                |

SCHOLARONE™  
Manuscripts

1       **The rate of normal lung function decline in ageing**  
2  
3  
4       **adults: a systematic review of prospective cohort**  
5  
6       **studies**  
7  
8  
9

10  
11       **Authors**  
12

13       Elizabeth T Thomas<sup>1</sup>, Medical student  
14

15       Dr. Michelle Guppy<sup>2,3</sup>, Associate Professor of General Practice, PhD candidate  
16

17       Prof. Sharon Straus<sup>4,5</sup>, Professor of Medicine, Director of Knowledge Translation Program  
18

19       Dr. Katy JL Bell<sup>3,6</sup> NHMRC Senior Research Fellow  
20

21       Prof. Paul Glasziou<sup>3</sup>, Professor of Evidence-Based Medicine, Director of the Centre for Research  
22       in Evidence-Based Practice  
23  
24  
25  
26  
27  
28  
29

30       **Author affiliations**  
31

- 32       1. Faculty of Health Sciences and Medicine, Bond University, Robina QLD 4226, Australia
- 33       2. School of Rural Medicine, University of New England, Armidale NSW 2351, Australia
- 34       3. Centre for Research in Evidence-Based Practice, Bond University, Robina QLD 4226,  
35       Australia
- 36       4. Department of Medicine, University of Toronto, Toronto, Ontario, Canada
- 37       5. Li Ka Shing Knowledge Institute of St. Michael's Hospital, Toronto, Ontario, Canada
- 38       6. Sydney School of Public Health, Sydney Medical School, Edward Ford Building (A27),  
39       University of Sydney, Sydney, Australia
- 40
- 41
- 42
- 43
- 44
- 45
- 46
- 47
- 48
- 49

50       **Corresponding Author:** Elizabeth T Thomas. Email: elizabeth.thomas@student.bond.edu.au  
51  
52  
53  
54

55       **Word Count:** 3825  
56  
57  
58  
59  
60

1 **Key Words** Ageing, age-related decline, lung function tests, cohort studies, systematic review  
2  
3  
4  
5  
6  
7  
8  
9  
10  
11  
12  
13  
14  
15  
16  
17  
18  
19  
20  
21  
22  
23  
24  
25  
26  
27  
28  
29  
30  
31  
32  
33  
34  
35  
36  
37  
38  
39  
40  
41  
42  
43  
44  
45  
46  
47  
48  
49  
50  
51  
52  
53  
54  
55  
56  
57  
58  
59  
60

For peer review only

**ABSTRACT**

**Objective** To conduct a systematic review investigating the normal age-related changes in lung function in adults without known lung disease.

**Design** Systematic review.

**Data sources** MEDLINE, Embase and CINAHL were searched for eligible studies from inception to December 11, 2017. This was supplemented by manual searches of reference lists and clinical trial registries.

**Eligibility criteria** We planned to include prospective cohort studies and randomised controlled trials (control arms) that measured changes in lung function over time in asymptomatic adults without known respiratory disease.

**Review methods** Two authors independently determined the eligibility of studies, extracted data, and assessed the risk of bias of included studies using the modified Newcastle Ottawa Scale.

**Results** From 2194 records screened, we identified 15 cohort studies with 30,712 participants. All included studies demonstrated decline in lung function - FEV<sub>1</sub>, FVC and peak expiratory flow rate (PEFR) with age. In studies with longer follow-up (>10 years), rates of decline in FEV<sub>1</sub> ranged from 17.7 to 29.2 ml/year (median 21.3 ml/year). Overall, men had faster absolute rates of decline (median 43.5ml/year) compared to women (median 30.5ml/year). Differences in relative FEV<sub>1</sub> change from baseline, however, were not observed between men and women. The

1 ratio of FEV<sub>1</sub>/FVC was reported as an outcome in only one study,  
2  
3 declining by 0.29% per year. An age-specific analysis showed  
4  
5 that the rate of FEV<sub>1</sub> function decline accelerates with each  
6  
7 decade of age.  
8  
9

10 **Conclusions** Lung function - FEV<sub>1</sub>, FVC and PEF<sub>R</sub> - decline with  
11  
12 age in people without known lung disease. The definition of  
13  
14 chronic airway disease may need to be reconsidered to allow for  
15  
16 normal ageing, and ensure that people likely to benefit from  
17  
18 interventions are identified rather than healthy people who may  
19  
20 be harmed by potential overdiagnosis and overtreatment. The  
21  
22 first step would be to apply age, sex and ethnicity-adjusted  
23  
24 FEV<sub>1</sub>/FVC thresholds to the disease definition of COPD.  
25  
26  
27

28 **Registration** PROSPERO CRD42018087066  
29  
30  
31  
32  
33  
34  
35  
36  
37  
38  
39  
40  
41  
42  
43  
44  
45  
46  
47  
48  
49  
50  
51  
52  
53  
54  
55  
56  
57  
58  
59  
60

### Strengths and limitations

- This is the first review to provide estimates for the median decline in spirometry measures including the FEV<sub>1</sub>, FVC and the FEV<sub>1</sub>/FVC ratio based on longitudinal data.
- We used a modified version of the Newcastle-Ottawa Scale to assess risk of bias.
- The review may be prone to volunteer bias, and therefore may underestimate lung function decline among asymptomatic people.
- Only one study specifically reported the change of the FEV<sub>1</sub>/FVC ratio with age, and we did not have access to unpublished individual participant data to allow calculation of the FEV<sub>1</sub>/FVC ratio change where this was not reported.

## INTRODUCTION

In 2016, the World Health Organization estimated that chronic obstructive pulmonary disease (COPD) affected 251 million people worldwide, with its prevalence continuing to rise with an ageing population.<sup>1</sup> Current guidelines in UK<sup>2</sup>, Australasia<sup>3</sup>, Europe and the United States<sup>4</sup> recommend that COPD is diagnosed if an individual has symptoms such as dyspnoea or sputum production, if they have known risk factors such as smoking or biomass fuel exposure, and if they demonstrate post-bronchodilator airflow limitation on spirometry. Airflow limitation on spirometry is defined when the ratio of forced expiratory volume in one second (FEV<sub>1</sub>) to forced vital capacity (FVC) is less than 70% after bronchodilator administration.<sup>2,3</sup> However, this arbitrary diagnostic threshold has attracted criticism as it does not adjust for age or sex.<sup>5-10</sup>

Ageing is invariably accompanied by changes in lung function due to factors such as loss of lung elasticity, weakened muscles of respiration, and decreased surface area for alveolar gas exchange. Several published cross-sectional studies<sup>9 11-13</sup> and longitudinal studies<sup>14 15</sup> report that lung function parameters such as FEV<sub>1</sub> and FVC decline with age.

The 2018 update of the Global Initiative for Chronic Obstructive Lung Disease (GOLD) criteria<sup>16</sup> continues to suggest the use of the fixed ratio rather than an FEV<sub>1</sub> or FVC that lies outside of



1 the lower limit of normal (LLN) range. While the fixed ratio  
2  
3 threshold may be simple for clinicians to use, it does not  
4  
5 consider that lung function measurements may change with age and  
6  
7 vary with gender and ethnicity. Many laboratory tests already  
8  
9 have different reference range values for different ages and  
10  
11 electronic spirometry machines do the same. The GOLD criteria  
12  
13 acknowledge that this arbitrary fixed threshold may overdiagnose  
14  
15 normal healthy older adults as diseased and underdiagnose some  
16  
17 younger people with disease as healthy.<sup>17 18</sup>  
18  
19  
20  
21  
22  
23

24 Longitudinal studies need to be identified so that normal  
25  
26 changes in lung function can be calculated for different ages.  
27  
28 Monitoring change could be used in practice to complement a  
29  
30 single time point measurement to identify people who are not  
31  
32 within the expected normal range. We aimed to perform a  
33  
34 systematic review of prospective cohort studies and randomised  
35  
36 controlled trials, that examined changes in lung function with  
37  
38 age in asymptomatic individuals with no known lung disease who  
39  
40 have never smoked. This knowledge will enable further work to  
41  
42 develop age-, sex- and ethnicity-specific estimates that may be  
43  
44 especially useful in a primary care setting. This implies that  
45  
46 people are only diagnosed with COPD if their spirometry  
47  
48 measurements fall outside of the normal range for their age, sex  
49  
50 and ethnicity, rather than on the basis of a fixed value.  
51  
52  
53  
54  
55  
56  
57

## 58 **METHODS**

## Protocol registration

The protocol for this review was drafted in accordance with the PRISMA statement and the Meta-analyses of Observational Studies in Epidemiology (MOOSE) reporting guidelines. It was registered on PROSPERO (CRD42018087066) and is available from [http://www.crd.york.ac.uk/PROSPERO/display\\_record.php?ID=CRD42018087066](http://www.crd.york.ac.uk/PROSPERO/display_record.php?ID=CRD42018087066), see Supplementary File 1.

## Search strategy and inclusion criteria

We conducted electronic searches of MEDLINE, EMBASE and CINAHL databases from inception through to December 2017, using the search strategy specified in Supplementary File 2. This was developed with an information specialist. Electronic searches were complemented by manual searching through reference lists of studies that were identified for potential inclusion as well as backwards and forward searching. We also searched the WHO Clinical Trials registry and ClinicalTrials.gov registries using the key words “normal ageing”, “lung function decline”, “FEV1 decline”, “FVC decline” and “lung decline”.

We included cohort studies and also planned to include the control arms of randomised controlled trials that measured the decline of lung function in an aging population. The inclusion criteria were:

- Longitudinal studies that followed adults past the age of 65 years;
- Participants did not have a known risk factor for respiratory disease (such as smoking, occupational

1 inhalation), though studies could have included a  
2  
3 comparator arm with participants with risk factors;

- 4
- 5
- 6 • Participants without respiratory symptoms such as wheeze,  
7  
8 dyspnoea, chronic cough;
- 9
- 10 • Participants without known respiratory disease (chronic  
11  
12 airways disease, asthma);
- 13
- 14
- 15 • Three or more measurements of lung function undertaken;
- 16
- 17 • Studies with a follow-up period of three years or longer;
- 18  
19 and
- 20
- 21
- 22 • Studies that measure lung function (i.e. FEV<sub>1</sub>, FVC, peak  
23  
24 expiratory flow rate [PEFR]).
- 25
- 26
- 27
- 28

### 29 **Study selection and data extraction**

30  
31 Two authors (ETT, MG) independently screened the titles and  
32  
33 abstracts of studies identified in the initial search for  
34  
35 eligibility. Prior to commencing screening, a small subset of 50  
36  
37 titles were screened by the two reviewers as a calibration  
38  
39 exercise to check for >80% agreement. Similarly, after  
40  
41 screening, a calibration exercise was conducted for screening  
42  
43 the full texts of the studies and targeting >80% agreement. The  
44  
45 remaining full texts were retrieved and reviewed independently  
46  
47 by the authors to determine eligibility for inclusion. Non-  
48  
49 English publications were translated using Google Translate or  
50  
51 with the assistance of a translator. Disagreements were resolved  
52  
53 by consensus through discussion or with a third reviewer (PG).  
54  
55  
56  
57  
58  
59

1 If there were multiple reports of the same study, the most  
2 recent publication with longest length of follow up was selected  
3 for inclusion, and if the two studies had a similar length of  
4 follow up then the study with the largest sample size was  
5 included. Two authors independently extracted data from the  
6 studies. The Excel data extraction form was piloted using ten  
7 studies prior to data extraction as a calibration exercise to  
8 check for adequate agreement (>80%) between the reviewers. Any  
9 disagreements were resolved by consensus or with a third  
10 reviewer. Extracted measures included study setting, year and  
11 duration, participant eligibility criteria, sample size,  
12 participants demographics (ethnicity, gender, baseline age), any  
13 known risk factors or exposures, baseline organ function, organ  
14 function measurements, number and frequency of measurements,  
15 average length of follow up and loss to follow up. We also  
16 accounted for the proportion of the cohort that subsequently  
17 developed symptoms or disease during the course of the follow-  
18 up.

19 We assessed risk of bias of included studies using the six items  
20 of the Newcastle Ottawa Scale (NOS)<sup>19</sup> for assessing quality of  
21 included cohort studies. Disagreements were resolved by  
22 discussion or a third reviewer.

23 Assessed factors included:

- 1 • Representativeness of the exposed cohort (e.g. low risk:  
2 random selection; high risk: non-random selection e.g.  
3 volunteer sampling)  
4  
5
- 6 • Ascertainment of exposure - age (e.g. low risk: from  
7 medical records; high risk: self-reported)  
8  
9
- 10 • Demonstration that the outcome of interest was not present  
11 at start of study (e.g. low risk: participants were  
12 excluded on the basis of demonstrated air flow limitation;  
13 high risk: if participants were not screened)  
14  
15
- 16 • Assessment of outcome (e.g. low risk: spirometry; high  
17 risk: subjective measure of lung function)  
18  
19
- 20 • Adequate duration of follow up (e.g. low risk: equal to or  
21 greater than 3 years follow-up; high risk: less than 3  
22 years of follow-up)  
23  
24
- 25 • Adequate follow up of cohorts (e.g. low risk: less than 20%  
26 attrition, loss to follow-up explained; high risk: greater  
27 than 20% attrition, unexplained loss to follow-up)  
28  
29  
30  
31  
32  
33  
34  
35  
36  
37  
38  
39  
40  
41  
42

43 Studies were assessed as good quality if they had low risk of  
44 bias in all six domains, moderate quality if they had low risk  
45 of bias in four or five domains and low quality if they had low  
46 risk of bias for three or fewer domains.  
47  
48  
49  
50

#### 51 **Statistical analysis**

52  
53  
54  
55  
56  
57  
58  
59  
60

1 For each study cohort, we extracted the annual decline rates for  
2 each lung function measure. If these were not reported, we  
3 calculated crude decline rates for all reported lung function  
4 measure by subtracting the final measure from the initial  
5 measure and dividing the result by the duration of follow up. If  
6 these data were not available, we determined crude rates of  
7 decline from the graphs provided or contacted the study authors  
8 for original data. The data were first analysed descriptively  
9 using graphs to determine whether it was appropriate to pool the  
10 data. For continuous outcomes, the mean difference (MD) (or  
11 standardized mean difference if studies used different measuring  
12 scales) and standard deviations were calculated. The data were  
13 reported as an annual decline (unit/year). The overall rates of  
14 decline and corresponding 95% confidence intervals were  
15 presented in a forest plot. We planned to perform a meta-  
16 analysis to pool the estimates of decline.

17 We presented the data by functional parameter ( $FEV_1$ ,  $FEV_{0.75}$ , FVC,  
18 PEFr), and planned to compare annual decline rates by sex and  
19 ethnicity in absolute and relative terms, where data were  
20 available. We also extracted and presented age-specific decline  
21 rates by decade of age if studies reported these data. We  
22 planned to separately analyse the data of those who developed  
23 disease during follow-up. We also planned to examine for birth  
24 cohort effects if the data were available. Sensitivity analyses  
25 were planned for study duration greater than ten years.

## **Patient and Public Involvement**

Patients were not involved in the design, data extraction or data analysis of this review.

## **RESULTS**

### **Study characteristics**

From searches of Medline, Embase and CINAHL performed on December 11 2017, we identified 2,194 records. An additional 54 records were identified from clinical trials registries and reference list searches. From these, we retrieved 130 papers for full text review; 114 of these did not meet our selection criteria and a further six were removed as duplicates. In total, 15 studies<sup>20-34</sup> were included in the systematic review (with one study contributing two data sets<sup>29</sup>) (Figure 1). The studies included 30,712 participants and were conducted between 1959 and 2012 ranging from five to twenty-four years in duration (Table 1).

**Table 1. Characteristics of included studies**

| Source ID          | Cohort                                                            | Study duration (years)      | Study Centres | Study Setting | Study period | Sample Size | Mean Age (SD)                      | %Male  | Outcome        | Time points of measurement                                                                        |
|--------------------|-------------------------------------------------------------------|-----------------------------|---------------|---------------|--------------|-------------|------------------------------------|--------|----------------|---------------------------------------------------------------------------------------------------|
| Ahmadi-Abhari 2014 | EPIC-Norfolk                                                      | 13                          | 1             | England       | 1993 - 2011  | 8062        | 58.5 (9.2)**                       | 45     | FEV1, FVC      | 3 (0, 4, 13 years)                                                                                |
| Bartholomew 1998   | Busselton Population Health Surveys                               | 6                           | 1             | Australia     | 1966 - 1981  | 1499        | 41.6 (16.1)                        | 29.7   | FEV1, FVC      | 3 (0, 3, 6 years)                                                                                 |
| Burchfiel 1995     | Kuakini Honolulu Heart Program                                    | 6                           | 1             | USA           | 1965 - 1975  | 1248        | 54.6*                              | 100    | FEV1           | 3 (0, 2, 6 years)                                                                                 |
| Burrows 1986       | Tucson Epidemiological study of obstructive Lung Disease (TESOLD) | 9.6                         | 1             | USA           | 1972 - 1983  | 466         | 48.3 (19.1)                        | 33.9   | FEV1           | mean 5.2                                                                                          |
| Griffith 2001      | Cardiovascular Health Study                                       | 7                           | 4             | USA           | 1989 - 1997  | 5242        | 73.5 / 72.7 (5.5) / (5.2)          | 42.4   | FEV1, FVC      | 3 (0, 4, 7 years)                                                                                 |
| Lange 1998         | Copenhagen City Heart Study                                       | 15                          | 1             | Denmark       | 1976 - 1994  | 4305        | 51.7^                              | 37     | FEV1           | 3- Cycle 1: 1976 - 1978, Cycle 2: 1981-1983, Cycle 3: 1991-1994                                   |
| Liao 2015          | Framingham Heart Study                                            | 17                          | 1             | USA           | 1983 - 2007  | 543         | 47.6 (10.5)**                      | 38.1** | FEV1, FEV1/FVC | 5 - Cycle 1: 1983-1987, Cycle 2: 1987-1991, Cycle 3: 1991-1995, Cycle 4: 1995-1998, Cycle 5: 2007 |
| Maselko 2006       | MacArthur Successful Aging study                                  | 7                           | 3             | USA           | 1988-1995    | 544         | 74                                 | 31.8   | PEFR           | 3 (0, 3, 7 years),                                                                                |
| Pearson 1998       | Baltimore Longitudinal Study of Aging                             | Males: 11.5<br>Females: 5.7 | 1             | USA           | 1962 - 1991  | 173         | 42.4                               | 52.6   | FEV1           | 4.6 / 3 (every 2 years)                                                                           |
| Pelkonen 2001      | Seven Countries Study                                             | 30                          | 2             | Finland       | 1959 - 1989  | 200         | 47.6 (30 years)<br>49.4 (15 years) | 100    | FEV0.75        | 6 (0, 5, 10, 15, 20, 25, 30 years)                                                                |



1  
2  
3  
4  
5  
6  
7  
8  
9  
10  
11  
12  
13  
14  
15  
16  
17  
18  
19  
20  
21  
22  
23  
24

|               |                                                                  |       |   |                                                                   |             |      |                               |      |           |                                                                    |
|---------------|------------------------------------------------------------------|-------|---|-------------------------------------------------------------------|-------------|------|-------------------------------|------|-----------|--------------------------------------------------------------------|
| Proctor 2006  | Origins of Variance in the Old-Old (OCTO-Twin)                   | 8     | 1 | Sweden                                                            | 1991 – 2003 |      | 83.2 (2.8)                    | 33.0 | PEFR      | 5 (0,2,4,6,8 years)                                                |
| Sherman 1992  | Six Cities study of Air Pollution and Health                     | 12    | 6 | USA                                                               | 1974-1989   | 1486 | 47.2 / 48.2** (12.3) / (12.5) | 32.0 | FEV1, FVC | 4 (0,3,6,12 years)                                                 |
| Triebner 2017 | European Community Respiratory Health Survey                     | 19.7^ | 8 | Denmark; Germany; Spain; France; Iceland; Norway; Sweden; Estonia | 1991-2012   | 648  | 36.2**^                       | 0    | FEV1, FVC | 3 - Cycle 1: 1991-1994<br>Cycle 2: 1998-2002<br>Cycle 3: 2010-2012 |
| Wang 2004     | -                                                                | 5     | 1 | USA                                                               | 1985 - 1992 | 71   | 37^ (19-65)**                 | 100  | FEV1      | 3-11; every 6 months                                               |
| Xu 1995       | Dutch Study on Asthma and Chronic Obstructive Pulmonary Diseases | 24    | 2 | The Netherlands                                                   | 1965-1990   | 6293 | 35.06 / 44.5 (10.5) / (11.4)  | 22.5 | FEV1      | 9 (every 3 years)                                                  |

\*Calculated from taking the midpoint of each age group and averaging according to number of people in each age group  
 \*\* estimates include smokers  
 ^ Median (Range)  
 # / # indicates Males / Females

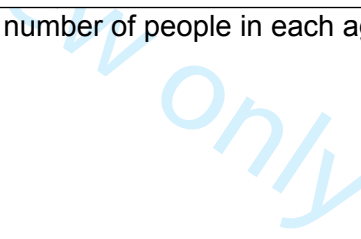

25  
26  
27  
28  
29  
30  
31  
32  
33  
34  
35  
36  
37  
38  
39  
40  
41  
42  
43  
44  
45  
46

### Overall age-related lung function decline

A meta-analysis was not performed due to substantial heterogeneity across the included studies, and a narrative synthesis was undertaken instead. Twelve studies reported changes in FEV<sub>1</sub> as an outcome. All studies demonstrated a decline with age, with overall rates of decline from each study ranging from 9.9 to 56.0ml/year (median 27.5ml/year). Seven of these studies examined the differences in rates of decline between males and females, showing greater absolute FEV<sub>1</sub> decline in males (median 43.5ml/year) than females (median 30.5ml/year) (Table 2, Figure 2). Relative rates of FEV<sub>1</sub> decline were calculated for men in eight studies and women in six studies that reported baseline FEV<sub>1</sub> values. There was no statistically significant difference between men and women's relative change of FEV<sub>1</sub> from baseline (p=0.7). FEV<sub>0.75</sub> decline was reported in one study.<sup>29</sup> This study provided two data sets (follow up after 15 years, 30 years) provided in Table 2.

Four studies reported changes in FVC, with rate of decline estimates ranging from 14.1ml/year in the youngest cohort<sup>32</sup> (median age 36.2 years) to 65.6ml/year in the older cohort<sup>24</sup> (mean age 73.0 years). In studies that measured FEV<sub>1</sub> and FVC over time, there was a greater decline in FEV<sub>1</sub> than FVC in one study, and greater decline in FVC than FEV<sub>1</sub> in three studies. These measures are average estimates across study participants

1 and do not enable calculation of individuals' FEV<sub>1</sub>/FVC ratios.

2  
3 In the one study where individuals' FEV<sub>1</sub>/FVC ratios were  
4 reported as an outcome<sup>26</sup>, there was a decline by 0.29% per year.

5  
6 PEF<sub>R</sub> was reported as an outcome in two studies,<sup>27 30</sup> which showed  
7 decline rates ranging from -6.6L/min/year in females to -  
8  
9  
10  
11  
12  
13 11.5L/min/year in males.

14  
15  
16  
17  
18  
19  
20  
21  
22  
23  
24  
25  
26  
27  
28  
29  
30  
31  
32  
33  
34  
35  
36  
37  
38  
39  
40  
41  
42  
43  
44  
45  
46  
47  
48  
49  
50  
51  
52  
53  
54  
55  
56  
57  
58  
59  
60

For peer review only

Table 2. Reported rates of annual lung function decline (FEV<sub>1</sub>, FVC, PEF<sub>R</sub>, FEV<sub>0.75</sub>) in a non-smoking, non-diseased, asymptomatic population from 16 cohort studies.

| Source ID                   | Mean age                   | Duration          | Sample size |        | Mean absolute unit decline/yr (SD) |                             | Overall relative decline (%) |        | Confounding variables                                        |
|-----------------------------|----------------------------|-------------------|-------------|--------|------------------------------------|-----------------------------|------------------------------|--------|--------------------------------------------------------------|
|                             |                            |                   | MALE        | FEMALE | MALE                               | FEMALE                      | MALE                         | FEMALE |                                                              |
| <b>FEV<sub>1</sub> (mL)</b> |                            |                   |             |        |                                    |                             |                              |        |                                                              |
| <b>Ahmadi 2014</b>          | 58.5**<br>(9.2)            | 13                | 3621        | 4441   | -17.7<br>(78.6)                    |                             |                              |        | Smoking; CRP categories                                      |
| <b>Bartholomew 1998</b>     | 41.6<br>(16.1)             | 6                 | 445         | 1054   | -43.5<br>(100.4)                   | -30.5<br>(144.8)            | 1.1                          | 1.2    | Smoking; Increased BMI                                       |
| <b>Burchfiel 1995</b>       | 54.6^                      | 6                 | 1248        |        | -21.6°                             |                             | 0.7                          |        | Smoking status                                               |
| <b>Burrows 1986</b>         | 48.3<br>(19.1)             | 9.6               | 158         | 308    | -10.3°<br>(6.3)                    | -9.1°<br>(5.7)              |                              |        | -                                                            |
| <b>Griffith 2001</b>        | 73.0**<br>(5.3)            | 7                 | 1976**      | 2604** | -52.3<br>(3.1) <sup>a</sup>        | -47.0<br>(2.8) <sup>a</sup> | 1.9                          | 1.7    | Caucasian vs African American (only 2 measurements), Smoking |
| <b>Lange 1998</b>           | 51.7^                      | 15                | 1592        | 2713   | -23.5<br>(10.4)                    | -18.3<br>(10.0)             | 0.8                          | 0.8    | Asthmatics vs non-asthmatic, Smoker vs non smoker            |
| <b>Liao 2015</b>            | 47.4**<br>(10.6)           | 17                | 207***      | 336*** | -25.8<br>(14.0)**                  |                             |                              |        | Smoking, Height, Less vs more likely dust exposure           |
| <b>Pearson 1998</b>         | 42.4                       | 11.5/5.7          | 91          | 82     | -43.5                              | -35.1                       | 1.0                          | 1.3    | -                                                            |
| <b>Sherman 1992</b>         | 47.9<br>(12.4)             | 12                | 475         | 1011   | -32.8<br>(29.5)                    | -27.5<br>(20.4)             | 1.0                          | 1.1    | Smoking                                                      |
| <b>Triebner 2017</b>        | 36.2 <sup>†</sup>          | 19.7 <sup>†</sup> |             | 648    |                                    | -22.4<br>(36.4)             |                              |        | Menopausal status, BMI                                       |
| <b>Wang 2004</b>            | 37 <sup>†</sup><br>(19-65) | 5                 | 71          |        | -56.0<br>(45.0)                    |                             | 1.3                          |        |                                                              |
| <b>Xu 1995*</b>             | 42.4^<br>(11.9)            | 24                | 1418        | 4875   | -28.3<br>(138.5)                   | -16.0<br>(135.5)            | 0.7                          | 0.5    |                                                              |

| FVC (mL)                 |                   |                   |        |        |                             |                             |     |     |  |                                                              |
|--------------------------|-------------------|-------------------|--------|--------|-----------------------------|-----------------------------|-----|-----|--|--------------------------------------------------------------|
| Ahmadi 2014              | 58.5**<br>(9.2)   | 13                | 3621   | 4441   | -31.1<br>(118.1)            |                             |     |     |  | Smoking; CRP categories                                      |
| Bartholomew 1998         | 41.6<br>(16.1)    | 6                 | 445    | 1054   | -47.2<br>(104.0)            | -36.0<br>(154.5)            | 1.0 | 1.1 |  | Smoking                                                      |
| Griffith 2001            | 73.0**<br>(5.3)   | 7                 | 1976** | 2604** | -78.4 <sup>a</sup><br>(4.2) | -65.6 <sup>a</sup><br>(3.8) | 2.9 | 2.4 |  | Caucasian vs African American (only 2 measurements), Smoking |
| Triebner 2017            | 36.2 <sup>†</sup> | 19.7 <sup>†</sup> |        | 648    |                             | -14.1<br>(42.8)             |     |     |  | Menopausal status, BMI                                       |
| FEV <sub>1</sub> /FVC    |                   |                   |        |        |                             |                             |     |     |  |                                                              |
| Liao 2015                | 47.4**<br>(10.6)  | 17                | 207**  | 336**  | -0.0029<br>(0.0023)**       |                             |     |     |  | Smoking, Less vs more likely dust exposure                   |
| FEV <sub>0.75</sub> (mL) |                   |                   |        |        |                             |                             |     |     |  |                                                              |
| Pelkonen 2001(a)         | 47.6              | 30                | 100    |        | -34.8                       |                             | 1.0 |     |  | Smoking                                                      |
| Pelkonen 2001(b)         | 49.4              | 15                | 200    |        | -46.4                       |                             | 1.4 |     |  | Smoking                                                      |
| PEFR (L/min)             |                   |                   |        |        |                             |                             |     |     |  |                                                              |
| Maselko 2006             | 74                | 7                 | 173    | 371    | -8.6<br>(30.3)              | -8.6<br>(34.7)              | 2.0 | 2.3 |  | Smoking                                                      |
| Proctor 2006*            | 83.2<br>(2.8)     | 8                 | 191    | 388    | -11.5<br>(2.2) <sup>a</sup> | -6.6<br>(1.1) <sup>a</sup>  | 2.9 | 2.4 |  |                                                              |

\*A non-linear relationship was also reported in the authors' data analysis.

\*\* Based on estimates including smokers

\*\*\*Estimates based on the assumption that there was an equal proportion of non-smokers who were male/female.

<sup>^</sup>Average derived from taking the midpoint value of each age group and calculating the overall mean age according to proportion in each group.

<sup>†</sup> median

SDs were calculated from 95% CI by subtracting the highest from the lowest confidence interval and dividing the result by 3.92.

##/## indicates Male/Female

<sup>°</sup>Estimates adjust for covariates including height and age

<sup>a</sup>mean (Standard error)

### Age-specific lung function decline by decade of age

The age-specific rates of FEV<sub>1</sub> change by decade of age were extracted or calculated from three studies.<sup>22 23 28</sup> In all but one study, estimates of decline increased from the fourth (age 30-40 years) to eighth (age 70-80 years) decades of life (Table 3). Two other studies also reported that the rate of decline may be non-linear in multiple regression models of FEV<sub>1</sub> and FVC decline (where age squared was also a statistically significant variable).<sup>34 35</sup>

| Study ID        | Sample Size (n) | Absolute mean decade-specific FEV <sub>1</sub> function decline rates (ml/year) |         |       |        |        |
|-----------------|-----------------|---------------------------------------------------------------------------------|---------|-------|--------|--------|
|                 |                 | 30-39                                                                           | 40-49   | 50-59 | 60-69  | 70-79  |
| Burchfiel 1995* | Male (1248)     |                                                                                 | -19.5** | -21.6 | -25.0  |        |
| Burrows 1986    | Male (158)      | +2.83                                                                           | -3.01   | -8.85 | -14.69 | -20.53 |
|                 | Female (308)    | +2.73                                                                           | -2.51   | -7.76 | -13.01 | -18.26 |
| Pearson 1998    | Female (82)     | -23.8                                                                           | -33.4   | -30   | -23.4  | -25.8  |
|                 | Male (91)       | -34                                                                             | -34     | -34   | -34    | -34    |

**Table 3. Age-specific lung function decline by decade of age as reported in three cohorts**

\*Estimates adjust for covariates including height and age

\*\*Includes participants 45-49.

Two studies examined lung function change within age brackets that did not conform to our decade-specific analysis.

1 Bartholomew 1998<sup>21</sup> reported greater decline rates in never  
2 smokers aged above 45 years (females: -30.7ml/year, males -  
3  
4 45.8ml/year) compared to those aged below 45 years (females: -  
5  
6 24.3ml/year, males: -36.8ml/year). Lange 1998<sup>25</sup> compared decline  
7  
8 rates in both male and female non-smokers in 20-year age groups.  
9  
10 Females aged 60-79 years had the greatest decline rates (-31.7 ±  
11  
12 2.1ml/year) compared to the 40-59 age group (-17.7 ± 1.4ml/year)  
13  
14 and the 20-39 age group which reported an increase of 5.0 ±  
15  
16 2.7ml/year. Similarly, males aged 60-79 years had the greatest  
17  
18 decline rates (-37.1 ± 3.7ml/year) compared to the 40-59 year age  
19  
20 group (-24.2 ± 2.6ml/year) and the 20-39 year age group (-4.6 ±  
21  
22 4.2ml/year).

### 31 **Overall rates of mortality/symptom/disease development**

32 Few studies reported these outcomes in an initially  
33  
34 asymptomatic, non-smoking population. One study (Proctor)<sup>30</sup>  
35  
36 reported 85% mortality rate in the elderly cohort (age range 79  
37  
38 - 96) over eight years. Another study (Lange 1998)<sup>25</sup> reported  
39  
40 that in their study of non-asthmatics, 364 (2%) patients who did  
41  
42 not report having asthma at the beginning of the study, later  
43  
44 reported it in follow up. However, this estimate included  
45  
46 smokers. One study (Wang)<sup>33</sup> performed their analyses on a highly  
47  
48 screened population, meaning they excluded participants from all  
49  
50 analyses who developed disease or symptoms during study follow  
51  
52 up. No studies reported the rates of lung function change in  
53  
54  
55  
56  
57  
58  
59

1 those who developed disease during the course of the study  
2  
3 compared with those who did not.  
4  
5  
6  
7

## 8 **Sensitivity analyses**

9

10 Heterogeneity in study duration was explored in Figure 3A. After  
11 removing studies with a follow up of less than ten years, the  
12 median rate of decline of FEV<sub>1</sub> was 21.3ml/year (Figure 3B).  
13  
14  
15  
16  
17

## 18 **Predictors of the rate of decline in lung function in people** 19 20 **without known lung disease** 21 22

### 23 *Smoking*

24 Although we didn't include smokers in our main analysis, some  
25 studies did compare non-smokers and smokers which we report  
26 here. The decline rates were compared in non-smokers with  
27 smokers in eight studies<sup>21 22 24-27 29 31</sup>. In all six studies  
28 measuring FEV<sub>1</sub>, smoking was observed to increase the rate of FEV<sub>1</sub>  
29 decline.<sup>21 22 24-26 31</sup> In the two studies measuring FVC, smoking  
30 increased FVC decline<sup>21 24</sup>. FEV<sub>1</sub>/FVC decline was greater in  
31 smokers than nonsmokers in one study<sup>26</sup> and FEV<sub>0.75</sub> in another  
32 study<sup>29</sup>.  
33  
34  
35  
36  
37  
38  
39  
40  
41  
42  
43  
44  
45

### 46 *BMI*

47 Two studies reported the association of BMI with FEV<sub>1</sub> change. In  
48 Bartholomew 1998<sup>21</sup>, increased BMI significantly affected FEV<sub>1</sub>  
49 decline (p = 0.008 for females; p=0.007 for males). However, an  
50 estimate for this association was not provided. In Triebner  
51  
52  
53  
54  
55  
56  
57  
58  
59  
60



1 2017<sup>32</sup>, obese individuals reported greater declines of FEV<sub>1</sub>  
2  
3 (29ml/year) and FVC (25ml/year) compared to individuals with  
4  
5 normal BMI (FEV<sub>1</sub> 22ml/year, FVC 10ml/year).  
6  
7

#### 8 *Ethnicity*

9

10 Griffith<sup>24</sup> was the only study that assessed ethnicity,  
11  
12 specifically comparing African-American participants to White  
13  
14 participants. We did not include the African-American cohort in  
15  
16 our analysis as only two measurements were performed on this  
17  
18 population. However, FEV<sub>1</sub> and FVC declines were greater in Whites  
19  
20 compared to African-Americans.  
21  
22

#### 23 *Systolic blood pressure*

24

25 Griffith<sup>24</sup> examined the correlation of systolic blood pressure  
26  
27 greater than 160mmHg with FEV<sub>1</sub> and FVC decline and found that  
28  
29 declines were on average 5.6ml/year and 10.9ml/year greater  
30  
31 respectively (p <0.01).  
32  
33

#### 34 *Dust exposure*

35

36 Liao<sup>26</sup> explored the effects of dust exposure on FEV<sub>1</sub> and FEV<sub>1</sub>/FVC  
37  
38 decline. Participants with more dust exposure experienced a mean  
39  
40 FEV<sub>1</sub> decline that was 4.5ml/year greater than participants with  
41  
42 less dust exposure (p= 0.007). Dust exposure did not  
43  
44 significantly affect FEV<sub>1</sub>/FVC ratio decline, suggesting that FVC  
45  
46 declined in parallel to FEV<sub>1</sub>.  
47  
48  
49

#### 50 *Menopausal status*

51

52 Triebner<sup>32</sup> reported that menopausal status affected the rate of  
53  
54 decline, with rates of FEV<sub>1</sub> decline on average 3.8ml/year greater  
55  
56  
57  
58  
59

1 in peri-menopausal women, and 5.2ml/year greater in  
2  
3 postmenopausal women. FVC decline was 10.2ml/year greater in  
4  
5 peri-menopausal women, and 12.5ml/year greater in post-  
6  
7 menopausal women, compared to pre-menopausal women.  
8  
9

### 12 **Risk of bias**

14 Risk of bias was determined using a modified version of the  
15  
16 Newcastle-Ottawa Scale<sup>19</sup> (Figures 4, 5). No studies received low  
17  
18 risk of bias in all domains, but four studies had a low risk of  
19  
20 bias in all but one domain.<sup>23 28 31</sup> Thirteen studies (81%) were  
21  
22 graded as having low risk of bias for representativeness of the  
23  
24 population. Six studies (38%) were judged as low risk of bias on  
25  
26 how they ascertained the age of the participants (from Medicare  
27  
28 eligibility lists or health records). Five cohort studies (31%)  
29  
30 clearly demonstrated that pulmonary impairment was not present  
31  
32 in participants at the beginning of the study. All studies  
33  
34 (100%) used a spirometer to measure lung function which is a  
35  
36 validated objective instrument. All studies (100%) had adequate  
37  
38 duration of follow-up (three years or longer). Fourteen studies  
39  
40 (88%) had a high risk of bias for having high attrition rates in  
41  
42 their studies (>20%).  
43  
44  
45  
46  
47  
48  
49  
50

## 51 **DISCUSSION**

### 53 **Statement of principal findings**

1 This systematic review of fifteen prospective cohort studies  
2  
3 conducted in thirteen countries provides a summary of all the  
4  
5 available evidence looking at lung function change with age.  
6  
7 Lung function declines with age in normal, asymptomatic adults  
8  
9 with higher rates of decline in absolute lung function  
10  
11 parameters in men compared to women. However, the relative rates  
12  
13 of decline from baseline between men and women do not differ  
14  
15 significantly. The decline in absolute and relative lung  
16  
17 function parameters also accelerates with age and is exacerbated  
18  
19 by factors such as smoking and BMI. We were unable to compare  
20  
21 lung function decline rates of different ethnicities due to  
22  
23 insufficient data. There was a paucity of longitudinal studies  
24  
25 that reported changes in FEV<sub>1</sub>/FVC rather than reporting the two  
26  
27 parameters separately.  
28  
29  
30  
31  
32  
33  
34

### 35 **Strengths and weaknesses of the study**

36  
37 This systematic review examined all the available primary  
38  
39 studies to allow an examination of the consistency of estimates  
40  
41 of decline in FEV<sub>1</sub>, FVC, FEV<sub>1</sub>/FVC ratio and PEF. This review  
42  
43 particularly focused on older adults; this group is relatively  
44  
45 understudied and yet more prone to overdiagnosis and  
46  
47 misdiagnosis.<sup>6 8 18</sup> While the majority of current prediction  
48  
49 equations of lung function are based on cross-sectional  
50  
51 studies<sup>36-39</sup> our review searched for longitudinal studies as they  
52  
53 change in lung function may provide a complement to measurement  
54  
55  
56  
57  
58  
59  
60

1 at one time point in predicting future lung function.<sup>37</sup> Our  
2  
3 review included participants who were ageing normally, but may  
4  
5 have had non-pulmonary co-morbidities such as hypertension and  
6  
7 diabetes mellitus. This enabled us to investigate a population  
8  
9 that was more representative of a normal ageing population.  
10  
11  
12  
13

14  
15 Our review has some limitations. We did not have access to  
16  
17 unpublished individual participant data to allow calculation of  
18  
19 FEV<sub>1</sub>/FVC for the majority of studies, where this were not  
20  
21 reported. Individual patient data would also allow a more robust  
22  
23 analysis of changes in lung function between individuals in the  
24  
25 studies. We were unable to pool the results due to significant  
26  
27 heterogeneity across the populations. This review's findings are  
28  
29 also limited by the quality of the included studies, all of  
30  
31 which were judged moderate or low quality. Since this review is  
32  
33 based on limited populations, the findings may not be  
34  
35 generalisable to all individuals, especially those of non-  
36  
37 Caucasian ethnicities or from less economically developed  
38  
39 countries where smoking and air pollution may be more prevalent  
40  
41 for example. The review's findings may underestimate lung  
42  
43 function decline among asymptomatic people, as volunteer bias  
44  
45 may be present with cohort studies where healthier individuals  
46  
47 may be more likely to participate.  
48  
49  
50  
51  
52

53 Our review did not consider the extent of short term within-  
54  
55 person variation, or "noise", in lung function measurements,  
56  
57  
58  
59

1 which is likely to be considerable.<sup>40 41</sup> Any observed change in  
2 measurement is a combination of the true change, or "signal",  
3 and the random background "noise". The clinical utility of  
4 monitoring lung function to decide whether or not COPD is  
5 present, is in part determined by the ratio of signal to noise  
6 in the measurements.<sup>42</sup> Changes in measured lung function over a  
7 longer period of time may be more likely to indicate some true  
8 change rather than just background noise<sup>43</sup>, therefore we  
9 specified in our inclusion criteria that eligible studies should  
10 measure lung function on a minimum of three occasions.  
11  
12  
13  
14  
15  
16  
17  
18  
19  
20  
21  
22

23 We observed substantial heterogeneity across all of the included  
24 studies and results. This may be due to inherent differences  
25 within the populations studied (including distribution of ages,  
26 proportion of men vs women and ethnicities) or the duration of  
27 follow up, or that decline in normal healthy people may vary  
28 across individuals without causing disease. We explored  
29 differences in duration of follow-up as a potential source of  
30 heterogeneity in a sensitivity analysis excluding studies with  
31 less than ten years of follow up, but found that this did not  
32 change the median estimate substantially.  
33  
34  
35  
36  
37  
38  
39  
40  
41  
42  
43  
44  
45

46 Variation within the results may be explained by the "horse-  
47 racing effect", where an initially low FEV<sub>1</sub> measurement may  
48 reflect a greater loss of function in the preceding years and  
49 hence predicts faster decline in subsequent years.<sup>44 45</sup> Regression  
50 to the mean, due to inclusion of people with randomly high (or  
51  
52  
53  
54  
55  
56  
57  
58  
59  
60

1 low) measured lung function in the primary studies, may also  
2 have contributed to heterogeneity of the results.<sup>46</sup> A simple way  
3 that primary studies may assess for a horse racing effect, while  
4 allowing for regression to the mean, is by constructing Bland-  
5 Altman plots of change vs mean FEV1 level<sup>47</sup> (or substituting PEFr  
6 for mean FEV1 as these are highly correlated.<sup>48</sup>)  
7  
8  
9  
10  
11  
12  
13  
14  
15  
16

### 17 **Comparison with previous research**

18 A number of cross-sectional studies have compared people  
19 diagnosed with COPD using a fixed threshold and the lower limit  
20 of normal (LLN) definition, reporting that the GOLD criteria  
21 leads to misdiagnosis of COPD.<sup>5-8 49</sup> A prospective cohort study  
22 found that the fixed threshold of the GOLD criteria  
23 overdiagnosed a large proportion of elderly people over the age  
24 of 70, and the LLN criteria tended to under-diagnose COPD, when  
25 compared to the reference standard which consisted of an expert  
26 panel who used all available diagnostic information including  
27 spirometry.<sup>18</sup>  
28  
29  
30  
31  
32  
33  
34  
35  
36  
37  
38  
39  
40  
41  
42  
43

### 44 **Meaning of the study: possible explanations and implications for** 45 **clinicians and policymakers**

46 This review has found that lung function declines with age in  
47 all studied populations. The rate of decline appears to  
48 accelerate with age, and age-specific estimates of FEV<sub>1</sub>, FVC and  
49 FEV<sub>1</sub>/FVC ratio may be more appropriate for diagnosis of COPD than  
50  
51  
52  
53  
54  
55  
56  
57  
58  
59  
60

1 the fixed threshold currently used across all ages. Currently,  
2 prediction equations for calculating mean lung function values  
3 as well as the lower-limit of normal (LLN) for all ages are  
4 based on data from cross-sectional studies, however it is argued  
5 that this is problematic as they do not factor in the important  
6 dimension of time.<sup>50 51</sup> Therefore, more reliable age-specific  
7 estimates and prediction equations are required.

19 Clinicians need to consider whether 'abnormal' spirometry  
20 results may in fact represent normal ageing. This is especially  
21 true for making a formal diagnosis of COPD. If a patient is  
22 symptomatic and has airflow obstruction as defined by GOLD  
23 criteria, it may be necessary to consider alternative diagnoses  
24 such as a dyspnoea of cardiac origin. One proposal for  
25 identifying individuals who are experiencing greater loss of  
26 lung function than expected, is to develop 'decline charts' that  
27 predict FEV<sub>1</sub> or FEV<sub>1</sub>/FVC loss for different ages. This can allow  
28 clinicians to monitor lung function over time and assess whether  
29 individuals are tracking along expected decline curves. These  
30 would also need to account for noise in measurement.

49 Future research should focus on conducting long-term  
50 longitudinal studies in less-studied populations, with emphasis  
51 on older adults. These studies should examine the rates of  
52 decline in people who eventually become symptomatic or develop

1 disease. This information can guide clinicians to predict what  
2 rate of lung function decline may be a prognostic indicator of  
3 COPD onset and progression. Further well-designed prospective  
4 studies that investigate changes in FEV<sub>1</sub>/FVC may allow for the  
5 development of algorithms that predict individuals' expected  
6 lung function over time according to their sex, smoking history,  
7 age, BMI and ethnicity. The observed change in lung function  
8 parameters might then be compared to the expected change to help  
9 the clinician determine whether this is extreme enough to  
10 warrant diagnosis of disease.  
11  
12  
13  
14  
15  
16  
17  
18  
19  
20  
21  
22  
23  
24  
25

#### 26 **ACKNOWLEDGEMENTS**

27  
28 The authors would like to thank Mr. Justin Clark for his  
29 assistance with the literature search, Miss Mari Tashiro for her  
30 help with the translation of Japanese studies, Dr Mark Jones for  
31 his advice on statistical analysis and Dr Claudia Dobler for her  
32 specialist input on this review.  
33  
34  
35  
36  
37  
38  
39  
40  
41

#### 42 **MANUSCRIPT PREPARATION**

43  
44 This manuscript was prepared in accordance with the PRISMA  
45 statement and the Meta-analyses of Observational Studies in  
46 Epidemiology (MOOSE) reporting guidelines.  
47  
48  
49  
50  
51

#### 52 **DETAILS OF FUNDING**



1 KJLB and PG have received funding from the Australian National  
2 Health and Medical Research Council (Centre for Research  
3 Excellence Grant No 1104136, Australia Fellowship No. 527500 and  
4 Program Grant No 633003). The funders had no role in design and  
5 conduct of the study; collection, management, analysis, and  
6 interpretation of the data; and preparation, review, or approval  
7 of the manuscript.  
8  
9  
10  
11  
12  
13  
14  
15  
16  
17  
18  
19

#### 20 **ETHICAL APPROVAL**

21 Ethical approval was not required for this study.  
22  
23  
24  
25

#### 26 **DATA SHARING STATEMENT**

27 No additional data available.  
28  
29  
30  
31  
32

#### 33 **CONTRIBUTOR STATEMENT**

34  
35 ETT was involved with devising the review methods, conducting  
36 electronic searches, screening of abstracts, data extraction,  
37 data analysis and interpretation, and co-drafting of the review.  
38  
39 MG was involved with devising the review methods, screening of  
40 abstracts, data extraction, data analysis and interpretation and  
41 co-drafting the review. KJLB was involved with devising the  
42 review methods, data analysis and interpretation, and co-  
43 drafting the review. SS was involved with devising the review  
44 methods, data analysis and interpretation, and co-drafting the  
45  
46  
47  
48  
49  
50  
51  
52  
53  
54  
55  
56  
57  
58  
59  
60

1 review. PG was involved with devising the review methods, data  
2 analysis and interpretation, and co-drafting the review.  
3  
4  
5  
6  
7

#### 8 **COPYRIGHT / EXCLUSIVE LICENCE FOR PUBLICATION**

9

10 The Corresponding Author has the right to grant on behalf of all  
11 authors and does grant on behalf of all authors, an exclusive  
12 licence (or non exclusive for government employees) on a  
13 worldwide basis to the BMJ Publishing Group Ltd to permit this  
14 article (if accepted) to be published in BMJ editions and any  
15 other BMJ PGL products and sublicences such use and exploit all  
16 subsidiary rights, as set out in our licence.  
17  
18  
19  
20  
21  
22  
23  
24  
25  
26  
27

#### 28 **COMPETING INTERESTS**

29

30 All authors have completed the ICMJE uniform disclosure form at  
31 [http://www.icmje.org/coi\\_disclosure.pdf](http://www.icmje.org/coi_disclosure.pdf) and declare: no support  
32 from any organization for the submitted work; no financial  
33 relationships with any organizations that might have an interest  
34 in the submitted work in the previous three years, no other  
35 relationships or activities that could appear to have influenced  
36 the submitted work.  
37  
38  
39  
40  
41  
42  
43  
44  
45  
46  
47  
48

#### 49 **TRANSPARENCY DECLARATION**

50

51 The lead author (ETT) affirms that the manuscript is an honest,  
52 accurate, and transparent account of the study being reported;  
53 that no important aspects of the study have been omitted; and  
54  
55  
56  
57  
58  
59  
60

1 that any discrepancies from the study as originally planned have  
2  
3  
4 been explained.  
5  
6  
7  
8  
9  
10  
11  
12  
13  
14  
15  
16  
17  
18  
19  
20  
21  
22  
23  
24  
25  
26  
27  
28  
29  
30  
31  
32  
33  
34  
35  
36  
37  
38  
39  
40  
41  
42  
43  
44  
45  
46  
47  
48  
49  
50  
51  
52  
53  
54  
55  
56  
57  
58  
59  
60

For peer review only

**REFERENCES**

1. Chronic obstructive pulmonary disease (COPD): World Health Organization; 2017 [Available from: [http://www.who.int/news-room/fact-sheets/detail/chronic-obstructive-pulmonary-disease-\(copd\)](http://www.who.int/news-room/fact-sheets/detail/chronic-obstructive-pulmonary-disease-(copd))] accessed 5 Aug 2018.
2. Chronic obstructive pulmonary disease in over 16s: diagnosis and management: National Institute for Health and Care Excellence; 2010 [Available from: <https://www.nice.org.uk/guidance/cg101>] accessed 5 Aug 2018.
3. The COPD-X Plan: Australian and New Zealand Guidelines for the management of Chronic Obstructive Pulmonary disease 2018: Lung Foundation Australia; 2018 [Available from: [https://copdx.org.au/wp-content/uploads/2018/06/COPDX-V2-53-March-2018\\_2.pdf](https://copdx.org.au/wp-content/uploads/2018/06/COPDX-V2-53-March-2018_2.pdf)] accessed 5 Aug 2018.
4. Qaseem A, Wilt T, Weinberger S, et al. Diagnosis and Management of Stable Chronic Obstructive Pulmonary Disease: A Clinical Practice Guideline Update from the American College of Physicians, American College of Chest Physicians, American Thoracic Society, and European Respiratory Society. *Ann Int Med* 2011;155:179-91. doi: 10.7326/0003-4819-155-3-201108020-00008
5. Schermer T, Smeele I, Thoonen B, et al. Current clinical guideline definitions for airflow obstruction leads to substantial overdiagnosis of COPD in primary care. *Eur Respir J* 2008;52(2) doi: 10.1183/09031936.00170307

- 1 6. Swanney M, Ruppel G, Enright P, et al. Using the lower limit  
2 of normal for the FEV1/FVC ratio reduces the  
3  
4 of normal for the FEV1/FVC ratio reduces the  
5  
6 misclassification of airway obstruction. *Thorax*  
7  
8 2008;63(12):1046-51. doi: 10.1136/thx.2008.098483  
9  
10 [published Online First: Sep 11 2018]
- 11  
12 7. Shirtcliffe P, Weatherall M, Marsh S, et al. COPD prevalence  
13  
14 in a random population survey: a matter of definition. *Eur*  
15  
16 *Respir J* 2007;30:232-9.
- 17  
18 8. Hardie J, Buist A, Vollmer W, et al. Risk of over-diagnosis  
19  
20 of COPD in asymptomatic elderly never-smokers. *Eur Respir J*  
21  
22 2002;20:1117-22.
- 23  
24 9. Medbø A, Melbye H. Lung function testing in the elderly—Can  
25  
26 we still use FEV1/FVC<70% as a criterion of COPD? *Respir*  
27  
28 *Med* 2007;101(6):1097-105. doi:  
29  
30 <https://doi.org/10.1016/j.rmed.2006.11.019>  
31  
32  
33  
34
- 35 10. Miller M, Levy M. Chronic obstructive pulmonary disease:  
36  
37 missed diagnosis versus misdiagnosis. *BMJ* 2015;351:h3021.  
38  
39 doi: 10.1136/bmj.h3021  
40  
41
- 42 11. Morris J, Temple W, Koski A. Normal Values for The Ratio of  
43  
44 One-Second Forced Expiratory Volume to Forced Vital  
45  
46 Capacity. *Am Rev Respir Dis* 1973;108(4)  
47  
48
- 49 12. Hankinson J, Odencrantzm J, Fedan K. Spirometric Reference  
50  
51 Values from a Sample of the General U.S. Population. *Am J*  
52  
53 *Respir Crit Care Med* 1999;159:179-87.  
54  
55  
56  
57  
58  
59  
60

- 1  
2  
3  
4  
5  
6  
7  
8  
9  
10  
11  
12  
13  
14  
15  
16  
17  
18  
19  
20  
21  
22  
23  
24  
25  
26  
27  
28  
29  
30  
31  
32  
33  
34  
35  
36  
37  
38  
39  
40  
41  
42  
43  
44  
45  
46  
47  
48  
49  
50  
51  
52  
53  
54  
55  
56  
57  
58  
59  
60
13. Glindmeyer H, Lefante J, McColloster C, et al. Blue-collar normative spirometric values for Caucasian and African-American men and women aged 18 to 65. *Am J Respir Crit Care Med* 1995;151(2) doi:  
<https://doi.org/10.1164/ajrccm.151.2.7842200>
  14. Bossé R, Sparrow D, Garvey A, et al. Cigarette smoking, aging and decline in pulmonary function: A longitudinal study. *Arch Environ Health* 1980;35:247-52.
  15. Huhti E, Ikkala J. A 10-year follow-up study of respiratory symptoms and ventilatory function in a middle-age rural population. *Eur J Resp Dis* 1980;61:33-45.
  16. Pocket Guide to COPD Diagnosis, Management and Prevention: a guide for health care professionals: Global Initiative for Chronic Obstructive Lung Disease; 2018 [Available from: <https://goldcopd.org/wp-content/uploads/2018/02/WMS-GOLD-2018-Feb-Final-to-print-v2.pdf> accessed 5 Aug 2018.
  17. Van Dijk W, Tan W, Li P, et al. Clinical relevance of fixed ratio vs lower limit of normal of FEV1/FVC in COPD: patient-reported outcomes from the CanCOLD cohort. *Ann Fam Med* 2015;13(1):41-8.
  18. Güder G, Brenner S, Angermann C, et al. GOLD or lower limit of normal definition? a comparison with expert-based diagnosis of chronic obstructive pulmonary disease in a prospective cohort-study. *Respir Res* 2012;13(1):13. doi: 10.1186/1465-9921-13-13

- 1  
2  
3  
4  
5  
6  
7  
8  
9  
10  
11  
12  
13  
14  
15  
16  
17  
18  
19  
20  
21  
22  
23  
24  
25  
26  
27  
28  
29  
30  
31  
32  
33  
34  
35  
36  
37  
38  
39  
40  
41  
42  
43  
44  
45  
46  
47  
48  
49  
50  
51  
52  
53  
54  
55  
56  
57  
58  
59  
60
19. Wells G, Shea B, O'Connell D, et al. The Newcastle-Ottawa Scale (NOS) for assessing the quality of nonrandomised studies in meta-analyses: The Ottawa Hospital; [Available from: [http://www.ohri.ca/programs/clinical\\_epidemiology/oxford.asp](http://www.ohri.ca/programs/clinical_epidemiology/oxford.asp) accessed 12 Aug 2018].
20. Ahmadi-Abhari S, Kaptoge S, Luben R, et al. Longitudinal Association of C-Reactive Protein and Lung Function Over 13 Years: The EPIC-Norfolk Study. *Am J Epidemiol* 2014;179(1):48-56. doi: 10.1093/aje/kwt208
21. Bartholomew H, Knuiman M. Longitudinal analysis of the effect of smoking cessation on cardiovascular risk factors in a community sample: the Busselton Study. *J Cardiovasc Risk* 1998;5:263-71.
22. Burchfiel C, Marcus E, Curb J, et al. Effects of Smoking and Smoking Cessation on Longitudinal Decline in Pulmonary Function. *Am J Respir Crit Care Med* 1995;151:1778-85.
23. Burrows B, Lebowitz M, Camilli A, et al. Longitudinal Changes in Forced Expiratory Volume in One Second in Adults: Methodologic Considerations and Findings in Healthy Nonsmokers. *Am Rev Respir Dis* 1986;133:974-80.
24. Griffith K, Sherrill D, Siegel E, et al. Predictors of Loss of Lung Function in the Elderly: The Cardiovascular Health Study. *Am J Respir Crit Care Med* 2001;163:61-8.

- 1  
2  
3  
4  
5  
6  
7  
8  
9  
10  
11  
12  
13  
14  
15  
16  
17  
18  
19  
20  
21  
22  
23  
24  
25  
26  
27  
28  
29  
30  
31  
32  
33  
34  
35  
36  
37  
38  
39  
40  
41  
42  
43  
44  
45  
46  
47  
48  
49  
50  
51  
52  
53  
54  
55  
56  
57  
58  
59  
60
25. Lange P, Parner J, Vestbo J, et al. A 15-year follow-up study of ventilatory function in adults with asthma. *N Engl J Med* 1998;339:1194-200.
26. Liao S, Lin X, Christiani D. Occupational Exposures and Longitudinal Lung Function Decline. *Am J Ind Med* 2015;58:14-20.
27. Maselko J, Kubzansky L, Kawachi I, et al. Religious Service Attendance and Decline in Pulmonary Function in a High-Functioning Elderly Cohort. *Ann Behav Med* 2006;32(3):245-53.
28. Pearson J, Kao S, Brant L, et al. Longitudinal Change in Forced Expiratory Volume in Healthy, Non-smoking Men and Women: The Baltimore Longitudinal Study of Aging. *Am J Hum Biol* 1998;10:471-81.
29. Pelkonen M, Notkola I, Tukiainen H, et al. Smoking cessation, decline in pulmonary function and total mortality: a 30 year follow up study among the Finnish cohorts of the Seven Countries Study. *Thorax* 2001;56:703-7.
30. Proctor D, Fauth E, Hoffman L, et al. Longitudinal changes in physical functional performance among the oldest old: insight from a study of Swedish twins. *Aging Clin Exp Res* 2006;18:517-30.
31. Sherman C, Xu X, Speizer F, et al. Longitudinal Lung Function Decline in Subjects with Respiratory Symptoms. *Am Rev Respir Dis* 1992;148:855-9.



- 1  
2  
3  
4  
5  
6  
7  
8  
9  
10  
11  
12  
13  
14  
15  
16  
17  
18  
19  
20  
21  
22  
23  
24  
25  
26  
27  
28  
29  
30  
31  
32  
33  
34  
35  
36  
37  
38  
39  
40  
41  
42  
43  
44  
45  
46  
47  
48  
49  
50  
51  
52  
53  
54  
55  
56  
57  
58  
59  
60
32. Triebner K, Matulonga B, Johannessen A, et al. Menopause Is Associated with Accelerated Lung Function Decline. *Am J Respir Crit Care Med* 2017;195(8):1058-65.
33. Wang M, Petsonk E. Repeated Measures of FEV1 Over Six to Twelve Months: What Change is Abnormal? *J Occup Environ Med* 2004;46:591-95.
34. Xu X, Laird N, Dockery D, et al. Age, Period, and Cohort Effects on Pulmonary Function in a 24-Year Longitudinal Study. *Am J Epidemiol* 1995;141:554-66.
35. Ware J, Dockery D, Louis T, et al. Longitudinal and cross-sectional estimates of pulmonary function decline in never-smoking adults. *Am J Epidemiol* 1990;132:685-700.
36. Cherniack R, Raber M. Normal Standards for Ventilatory Function Using an Automated Wedge Spirometer. *Am Rev Respir Dis* 1971;106(1) doi:  
<https://doi.org/10.1164/arrd.1972.106.1.38>
37. Lung Function Testing: selection of reference values and interpretative strategies. *Am Rev Respir Dis* 1991;144:1202-18.
38. Morris J, Koski A, Johnson L. Spirometric Standards for Healthy Nonsmoking Adults. *Am Rev Respir Dis* 1971;103(1)
39. Paoletti P, Pistelli G, Fazzi P, et al. Reference values for vital capacity and flow-volume curves from a general population study. *Bull Eur Physiopathol Respir* 1986;22:451-9.

- 1  
2  
3  
4  
5  
6  
7  
8  
9  
10  
11  
12  
13  
14  
15  
16  
17  
18  
19  
20  
21  
22  
23  
24  
25  
26  
27  
28  
29  
30  
31  
32  
33  
34  
35  
36  
37  
38  
39  
40  
41  
42  
43  
44  
45  
46  
47  
48  
49  
50  
51  
52  
53  
54  
55  
56  
57  
58  
59  
60
40. MacIntyre N. Finding Signals Amidst the Noise in Pulmonary Function Testing. *Chest* 2007;132(2):367-8.
41. Becklake M, White N. Sources of variation in spirometric measurements. Identifying the signal and dealing with noise. *Occup Med* 1993;8(2):241-64.
42. Bell K, Glasziou P, Hayen A, et al. Criteria for monitoring tests were described: validity, responsiveness, detectability of long-term change, and practicality. *J Clin Epidemiol* 2014;67(2):152-9. doi: 10.1016/j.jclinepi.2013.07.015
43. Pellegrino R, Viegi G, Brusasco V, et al. Interpretative strategies for lung function tests. *Eur Respir J* 2005;26:948-68.
44. Fletcher C, Peto R, Tinker C, et al. The natural history of chronic bronchitis and emphysema. Oxford: Oxford University Press 1970.
45. Peto R. The horse-racing effect. *Lancet* 1981;2(8244):467-8.
46. Bland J, Altman D. Statistics Notes: Some examples of regression towards the mean. *BMJ* 1994;309:780. doi: <https://doi.org/10.1136/bmj.309.6957.780>
47. Bland J, Altman D. Statistics Notes: Measurement error proportional to the mean. *BMJ* 1996;313:106. doi: <https://doi.org/10.1136/bmj.313.7049.106>
48. Gautrin D, D'Aquino L, Gagnon G, et al. Comparison Between Peak Expiratory Flow Rates (PEFR) and FEV1 in the

- 1 Monitoring of Asthmatic Subjects at an Outpatient Clinic.  
2  
3  
4 *Chest* 1994;106(5):1419-26.  
5
- 6 49. Wang Y, Xiao W, Ma D, et al. Predicted lower limit of normal  
7  
8 reduces misclassification risk of airflow limitation in  
9  
10 asymptomatic elderly never-smokers. *Chin Med J*  
11  
12 2013;126(18):3486-92.  
13  
14
- 15 50. Brändli O, Schindler C, Künzli N, et al. Lung function in  
16  
17 healthy never smoking adults: reference values and lower  
18  
19 limits of normal of a Swiss population. *Thorax* 1996;51:277-  
20  
21 83.  
22  
23
- 24 51. Marks G. Are reference equations for spirometry an  
25  
26 appropriate criterion for diagnosing disease and predicting  
27  
28 prognosis? *Thorax* 2012;67:85-7. doi: 10.1136/thoraxjnl-  
29  
30 2011-200584  
31  
32  
33  
34  
35  
36  
37  
38  
39  
40  
41  
42  
43  
44  
45  
46  
47  
48  
49  
50  
51  
52  
53  
54  
55  
56  
57  
58  
59  
60

## Figure Legends

**Figure 1.** Study flow diagram showing the process for inclusion of prospective RCTs and cohort studies for estimating the rate of lung function decline with age.

**Figure 2.** Estimates of the rate of FEV<sub>1</sub> decline in males and females

**Figure 3A.** Effect of duration of study on the estimates of FEV<sub>1</sub> decline

**Figure 3B.** Sensitivity analysis exploring the effect of study duration on the estimates of FEV<sub>1</sub> decline with studies with less than ten years of follow-up removed.

**Figure 4.** Risk of bias summary for prospective cohort studies estimating the rate of lung function decline with age, assessed using a modified form of the Newcastle-Ottawa Scale.

**Figure 5.** Graphical representation of the risk of bias in prospective cohort studies estimating the rate of lung function decline with age.

**Figure 1. Flow Diagram of study selection for systematic review**

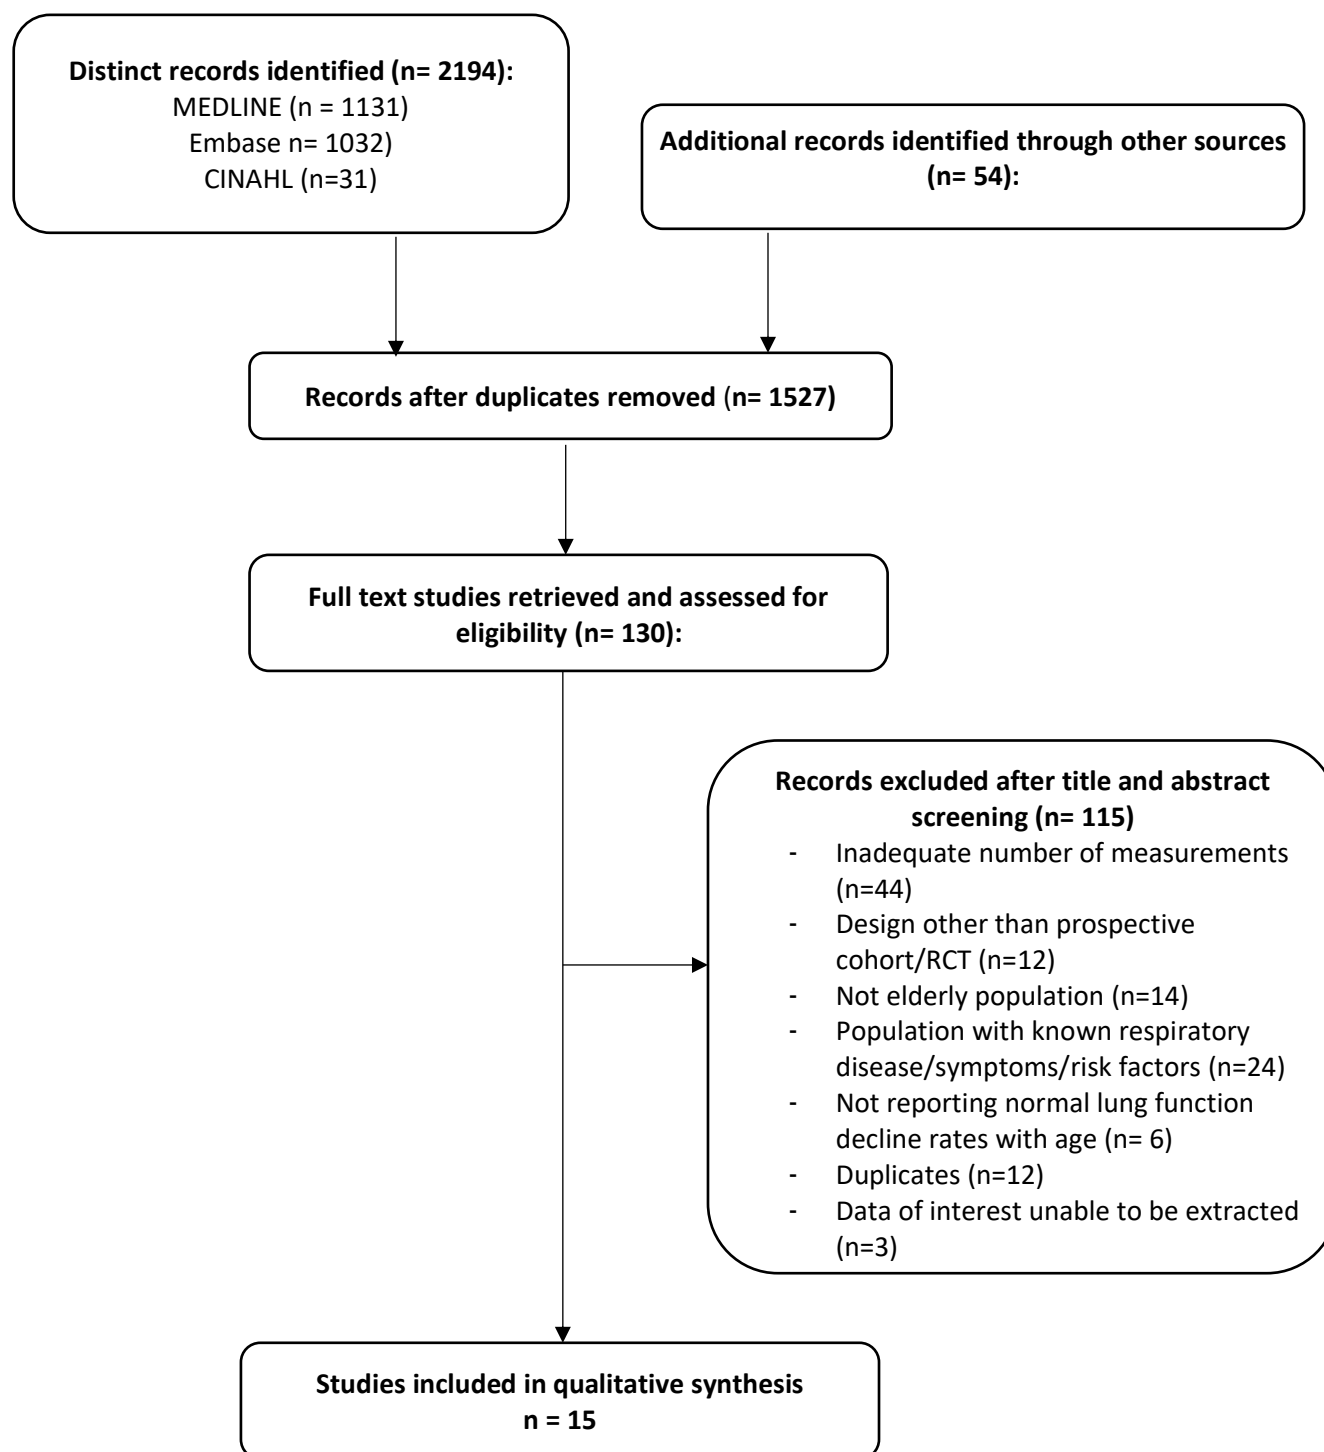

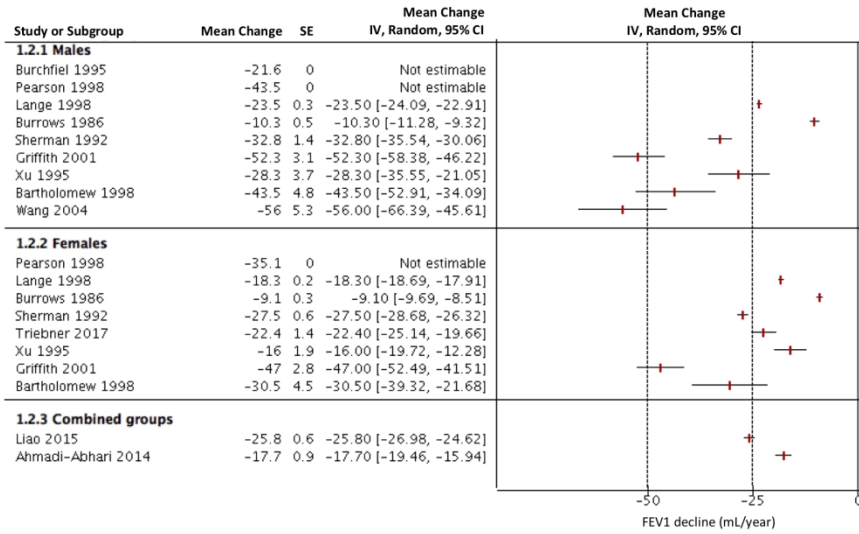

Figure 2. Estimates of the rate of FEV1 decline in males and females

296x209mm (150 x 150 DPI)

# Average FEV1 decline by study duration

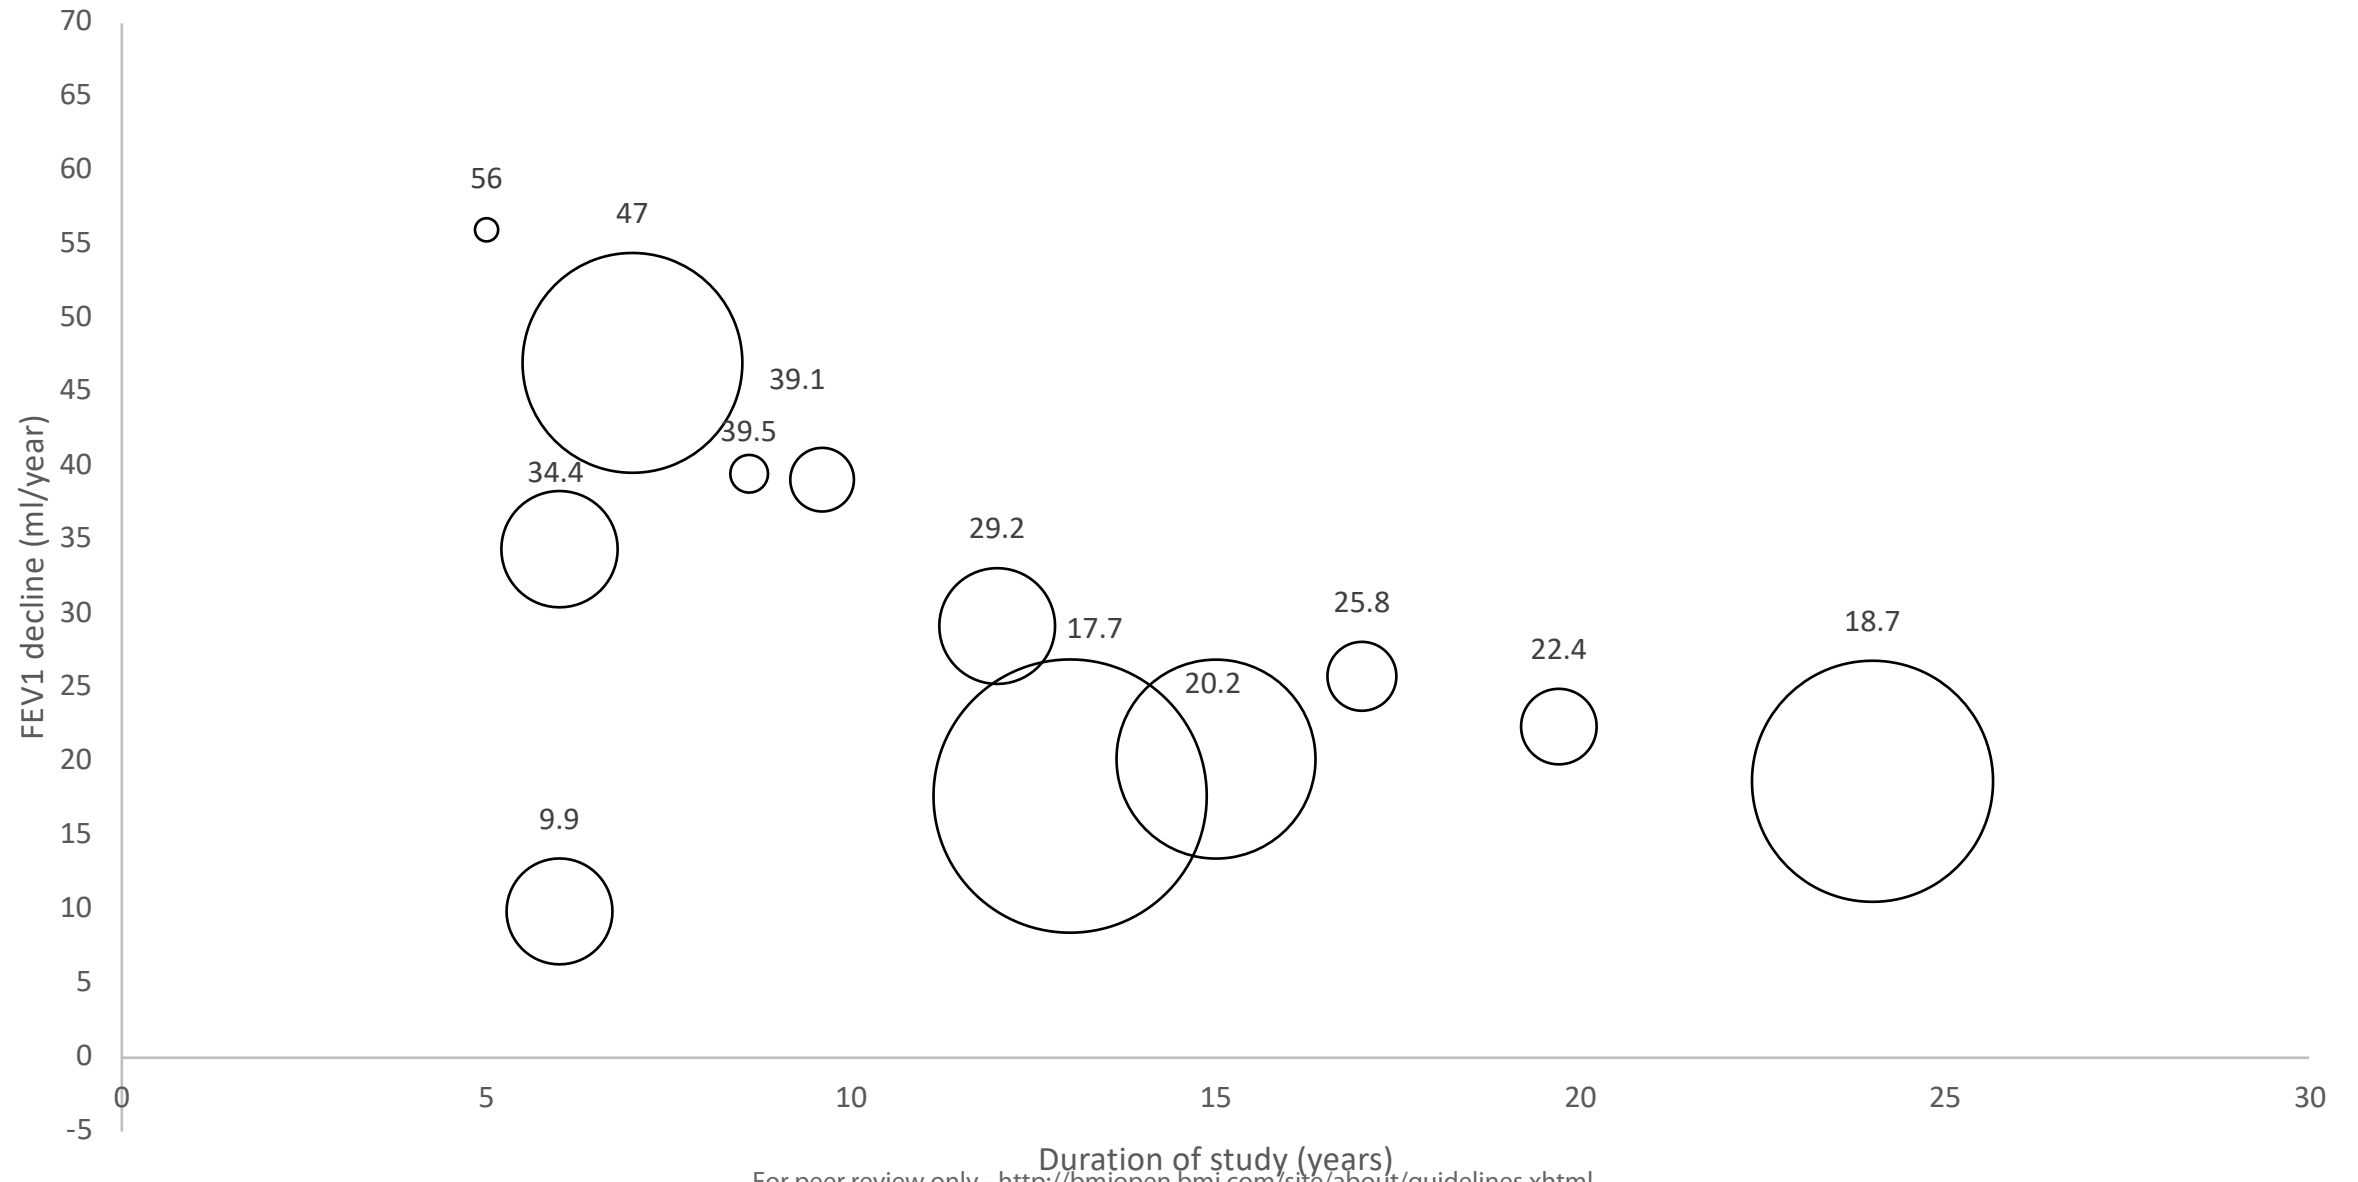

1  
2  
3  
4  
5  
6  
7  
8  
9  
10  
11  
12  
13  
14  
15  
16  
17  
18  
19  
20  
21  
22  
23  
24  
25  
26  
27  
28  
29  
30  
31  
32  
33  
34  
35  
36  
37  
38  
39  
40  
41

# Average FEV1 decline in studies with follow up of at least 10 years

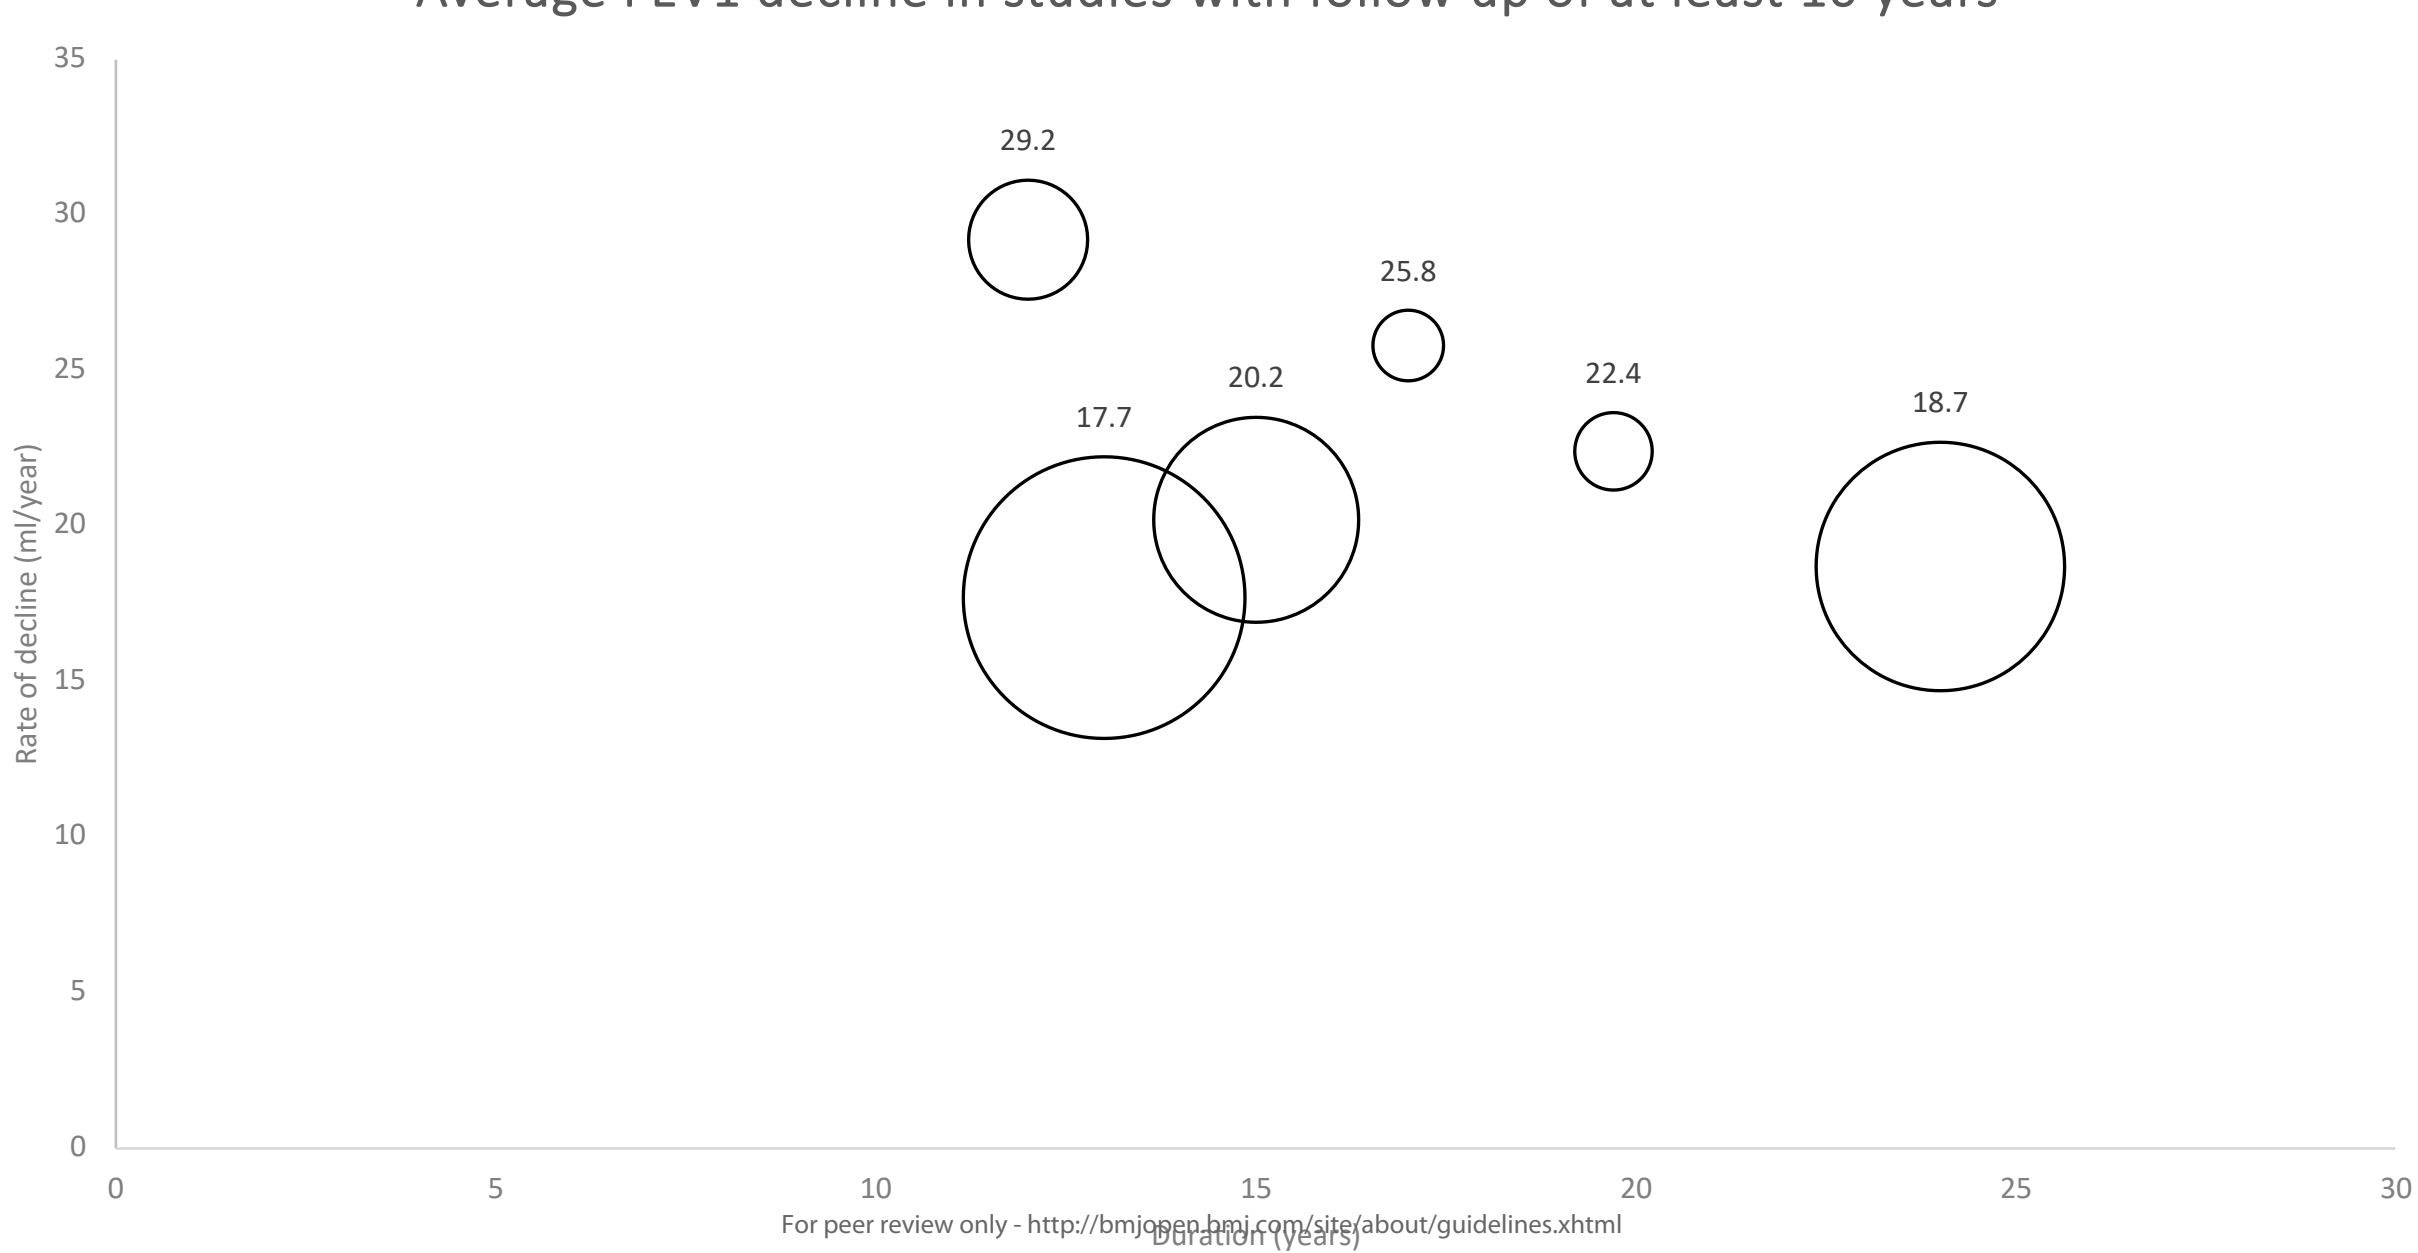

1  
2  
3  
4  
5  
6  
7  
8  
9  
10  
11  
12  
13  
14  
15  
16  
17  
18  
19  
20  
21  
22  
23  
24  
25  
26  
27  
28  
29  
30  
31  
32  
33  
34  
35  
36  
37  
38  
39  
40  
41



Demonstration that outcome of interest was not present at start of study

|                    | Representativeness of the exposed cohort | Ascertainment of exposure | Demonstration that outcome of interest was not present at start of study | Assessment of outcome | Duration of follow up | Adequacy of follow up of cohorts |
|--------------------|------------------------------------------|---------------------------|--------------------------------------------------------------------------|-----------------------|-----------------------|----------------------------------|
| Ahmadi-Abhari 2014 | +                                        | +                         | ?                                                                        | +                     | +                     | -                                |
| Bartholomew 1998   | +                                        | -                         | ?                                                                        | +                     | +                     | ?                                |
| Burchfiel 1995     | -                                        | -                         | -                                                                        | +                     | +                     | -                                |
| Burrows 1986       | +                                        | -                         | +                                                                        | +                     | +                     | +                                |
| Griffith 2001      | +                                        | +                         | -                                                                        | +                     | +                     | ?                                |
| Lange 1998         | +                                        | +                         | -                                                                        | +                     | +                     | -                                |
| Liao 2015          | +                                        | ?                         | -                                                                        | +                     | +                     | ?                                |
| Maselko 2006       | +                                        | +                         | ?                                                                        | +                     | +                     | -                                |
| Pearson 1998       | +                                        | ?                         | +                                                                        | +                     | +                     | +                                |
| Pelkonen 2001      | +                                        | ?                         | ?                                                                        | +                     | +                     | -                                |
| Proctor 2006       | +                                        | ?                         | ?                                                                        | +                     | +                     | -                                |
| Sherman 1992       | +                                        | +                         | +                                                                        | +                     | +                     | -                                |
| Triebner 2017      | +                                        | -                         | ?                                                                        | +                     | +                     | ?                                |
| Wang 2004          | -                                        | ?                         | +                                                                        | +                     | +                     | ?                                |
| Xu 1995            | -                                        | ?                         | ?                                                                        | +                     | +                     | ?                                |

1  
2  
3  
4  
5  
6  
7  
8  
9  
10  
11  
12  
13  
14  
15  
16  
17  
18  
19  
20  
21  
22  
23  
24  
25  
26  
27  
28  
29  
30  
31  
32  
33  
34  
35  
36  
37  
38  
39  
40  
41  
42  
43  
44  
45  
46  
47  
48  
49  
50  
51  
52  
53  
54  
55  
56  
57  
58  
59  
60

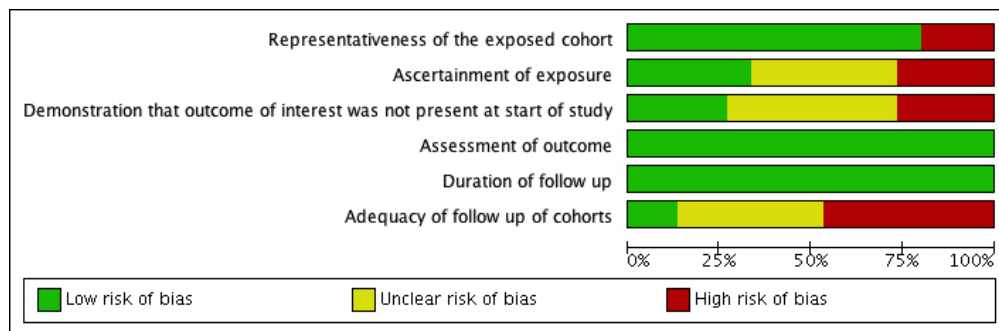

Figure 5. Graphical representation of the risk of bias in prospective cohort studies estimating the rate of lung function decline with age.

249x81mm (72 x 72 DPI)

# The rate of normal organ function decline with advancing age: protocol for a systematic review.

## Authors

Elizabeth T Thomas<sup>1</sup>

Michelle Guppy<sup>2,3</sup>

Sharon Straus<sup>4</sup>

Katy Bell<sup>2,5</sup>

Paul Glasziou<sup>2</sup>

## Author affiliations

1. Faculty of Health Sciences and Medicine, Bond University, Robina QLD 4226, Australia
2. Centre for Research in Evidence-based Practice, Bond University, Robina QLD 4226, Australia
3. School of Rural Medicine, University of New England, Armidale NSW 2351, Australia
4. Department of Medicine, University of Toronto, Toronto, Ontario, Canada
5. Sydney School of Public Health, Sydney Medical School, Edward Ford Building (A27), University of Sydney, Sydney, Australia

**Corresponding Author:** Elizabeth T Thomas. Email: [elizabeth.thomas@student.bond.edu.au](mailto:elizabeth.thomas@student.bond.edu.au)

## Key Words

Normal ageing, organ function, age-related decline

## ABSTRACT

**Background** The unprecedented rise in life expectancy in the last few decades has led to an increasing proportion of elderly people. Elderly individuals present a particularly complex challenge to health care due to their multiple comorbidities, frailty as well as their functional decline. In order to better understand and guide the care of geriatric patients, it is necessary to understand the natural rate of decline of various organ functions, so as not to inappropriately label them as having disease. This protocol is for a systematic review, which aims to calculate the rate of annual decline of lung, liver and pancreatic function as well as bone mineral density.

**Methods** An electronic literature search will be conducted in MEDLINE, EMBASE AND CINAHL from inception. Reference lists of included studies will also be searched for relevant prospective cohort studies and randomized controlled trials, which meet the pre-specified inclusion and exclusion criteria. The article selection and risk of bias of included studies will be determined independently by two reviewers. If possible, a meta-analysis will be conducted to pool estimates on the overall rate as well as the decade-specific rates of decline of the specified organ functions in a healthy aging cohort, and compare these estimates with cohorts that are exposed to risk factors.

**Discussion** This review aims to determine the rate of decline of organ function with age, and determine any predictors of decline. The results from this review will enable clinicians to better differentiate between physiological age-related decline and pathological decline when interpreting laboratory test results. This will prevent the overdiagnosis of elderly people with diseases that in fact represent normal ageing.

1  
2  
3 **Systematic review registration** PROSPERO CRD42018087066  
4

## 5 **BACKGROUND**

### 6 **Description of the condition**

7  
8  
9 Advances in modern medicine have resulted in unprecedented rise in life expectancy. The average  
10 person's life expectancy has risen by 5 years in the last fifteen years alone, the fastest rate of growth since  
11 the 1960s<sup>1</sup>. This has led to a rise in the number and proportion of persons aged 65 years and older with  
12 multiple chronic conditions and frailty, posing a complex social and economic challenge to healthcare  
13 systems.  
14

15  
16 Ageing is accompanied by physiological changes in the function of most (if not all) organs and senses.  
17 The physiological functions of some organs, including the lungs and kidneys, have been documented to  
18 reach a peak in early adulthood and then decline thereafter with age<sup>2</sup>. The rates of age-related functional  
19 decline are dependent on a number of factors, including genetics and environmental factors<sup>3,4</sup>.  
20

21 Measured lung function parameters decrease with age, due to factors such as loss of elasticity, weakened  
22 muscles of respiration and decreased surface area for alveolar gas exchange<sup>6</sup>. Several longitudinal studies  
23 have been performed to monitor and calculate the rate of FEV<sub>1</sub> (Forced expiratory volume in 1 second)  
24 decline, and highlight those who are at risk of developing disease<sup>3,7,8</sup>.  
25

26  
27 The liver also demonstrates measurable changes with age, with liver weight reported to decrease by as  
28 much as 20% after the age of 50 years<sup>2</sup>. Although some studies show that liver function tests do not  
29 change with age<sup>2,9,10</sup>, it is also established that albumin, - which is a marker of synthetic liver function,  
30 decreases with age (though this may in part, be due to other factors such as malnutrition or renal losses<sup>11</sup>).  
31 It has also been shown that the liver metabolises drugs slower in aged cohorts compared to younger  
32 cohorts<sup>2,12,13</sup>.  
33

34  
35 With advancing age, there is a progressive loss in number and function of insulin-producing beta-cells in  
36 the pancreas. This, coupled with increasing systemic insulin resistance in glucose receptors can result in  
37 the development of diabetes mellitus in the elderly<sup>14</sup>. Few studies have demonstrated this by monitoring  
38 healthy individuals for the development of impaired glucose tolerance or fasting glucose<sup>15</sup>.  
39

40  
41 Bone mineral density measurements also exhibits change with age, resulting in an increased risk of  
42 developing osteoporosis, which predisposes older people to minimal trauma fractures. Females have an  
43 accelerated decline of bone mass after the onset of menopause, due to declining oestrogen levels. Other  
44 factors, such as vitamin D, calcium levels, parathyroid gland function, renal function and gastrointestinal  
45 absorption also play a role in maintaining bone mass and skeletal function<sup>16</sup>.  
46

47  
48 Normal ageing may result in changes in laboratory test values and biomarkers, but these changes do not  
49 necessarily represent clinical impairment.<sup>5</sup> Even if laboratory tests show values that lie outside the  
50 reference ranges, organs have functional reserves that cannot easily be measured by standard laboratory  
51 testing. Laboratory test results should not be used as the sole basis for which a diagnosis of disease is  
52 made; rather, these values should be integrated with the patient's clinical symptoms in order to make a  
53 diagnosis.<sup>5</sup> A measured decrease in organ function also may not represent clinically significant decline,  
54  
55  
56  
57  
58  
59

1  
2  
3 instead demonstrating the normal process of ageing. One explanation for this may be that the demands of  
4 the elderly cohorts' activities of daily living are no longer the same as their younger counterparts.  
5

### 6 **Why it is important to do this review**

7  
8 Elderly people have increasingly been labelled with conditions such as prediabetes, chronic airways  
9 disease, osteopenia or liver disease as a result of laboratory testing. Although these conditions may  
10 represent a risk of progression to serious disease, which causes premature death, in many cases they may  
11 never progress to symptomatic disease and may even represent an expected level of function at that age.  
12  
13

14 A commonly-reported example is in chronic kidney disease, which is arbitrarily diagnosed by an eGFR  
15 (estimated glomerular filtration rate) threshold less than 60ml/min/1.73<sup>2</sup> for more than 3 months. There  
16 are no adjustments to this eGFR threshold for age, race or gender. Over 45% of the population over the  
17 age of 70 years have a diagnosis of chronic kidney disease according to this threshold<sup>17,18</sup>. Many of these  
18 individuals, however, never develop kidney failure or end stage renal disease, and have been  
19 inappropriately labeled (overdiagnosed) as having disease<sup>19</sup>.  
20  
21

22 It is important to distinguish pathological aging from physiological decline. Some measures of organ  
23 function (such as eGFR) are not calibrated by age or gender, causing overdiagnosis of healthy individuals  
24 with disease, which may never manifest or cause harm, and subsequent overtreatment. It is therefore  
25 important to clarify what constitutes normal for healthy, aging individuals. To our knowledge, no  
26 systematic review has been done to identify and compare the rates of functional decline across organs,  
27 and whether there are risk factors/predictors that are in common.  
28  
29

### 30 **OBJECTIVE**

31  
32 This review aims to determine the average rate of decline of lung function, liver function, pancreatic  
33 endocrine function and bone mineral density in healthy individuals with advancing age.  
34  
35

### 36 **METHODS**

#### 37 **Eligibility criteria**

##### 38 **Types of studies**

39 This review will consider prospective cohort studies or randomised controlled trials, which employ  
40 longitudinal designs (only if they include a control arm that does not receive treatment) with a minimum  
41 duration of three years and three separate measurements. Studies that report the age-related decline of the  
42 specified organ functions will be eligible for inclusion, irrespective of publication status and language of  
43 publication.  
44  
45  
46  
47

##### 48 **Types of participants**

49 Studies will be considered eligible for inclusion if they follow a cohort of adults to the age of 65 years or  
50 more. Participants who have a known risk factor, medical illness or pre-disease specific to the outcome  
51 being studied (i.e. participants with diabetes when investigating pancreatic function decline) will be  
52 excluded. Appropriate participants will be included irrespective of sex or ethnicity. Studies including  
53 pregnant women or children will be excluded.  
54  
55  
56  
57  
58  
59

### **Type of exposure**

We will include studies involving ageing adults with no known comorbidities. Studies will be eligible for inclusion if they follow a normal cohort. Studies that only followed cohorts with risk factors or known exposures and did not compare them to a normal cohort will be excluded. We plan to assess whether there are certain predictors of decline that organs have in common. Examples of risk factors may include:

- Smoking
- Symptomatic hypertension
- High BMI
- Hyperlipidemia
- Diabetes mellitus
- Alcohol consumption

### **Types of outcome measures**

We will include studies which report annual decline, or repeated measurements of organ function over time, to at least the age of 65 years. Studies should record a minimum of three measurements of organ function. Examples of these parameters include:

- Forced expiratory volume in 1 second (FEV<sub>1</sub>) for lung function
- Albumin as a marker of synthetic liver function
- Fasting blood sugar levels for pancreatic endocrine function
- Bone mineral density

## **SEARCH METHODS FOR IDENTIFICATION OF STUDIES**

### **Electronic searches**

We conducted electronic searches of MEDLINE, EMBASE and CINAHL databases from inception through to October 2017, using the search strategy at the end of this document. This was developed with the assistance of an information specialist.

### **Searching other resources**

Electronic searches were complemented by manual searching through reference lists of studies that were identified for potential inclusion as well as backwards and forward searching.

## **DATA COLLECTION AND ANALYSIS**

### **Selection of studies**

Two authors will independently screen titles and abstracts of all studies identified by the searches for potential inclusion. Prior to commencing screening, a small subset of 50 titles will be screened by the two reviewers as a calibration exercise to check for >80% agreement. After screening, a calibration exercise will be conducted screening the full texts of the studies targeting >80% agreement. The remaining full texts will then be retrieved and reviewed independently by the authors to determine eligibility for inclusion. Disagreements will be resolved by discussion or with another reviewer. If there are multiple reports of the same study, the most recent publication with longest length of follow up will be included.

### **Data extraction and management**

Two authors will independently extract data from the studies using a data extraction form. This form will be piloted using ten studies prior to data extraction as a calibration exercise to check for adequate agreement (>80%) between the reviewers. Data extraction will be performed using Excel and any disagreements will be resolved by discussion or by another reviewer. Extracted measures will include setting and year of the study, duration of the study, population size, ethnicity, baseline age, baseline organ function, organ function measurements, number and frequency of measurements, any known risk factors or exposures, proportion of those exposed, average length of follow up and loss to follow up. A random sample of the extraction will also be cross-checked by a third reviewer. All the measured outcomes (functional parameters) will initially be charted to show how often they are used in studies. A group of geriatricians and primary care physicians will be recruited from Bond University and Gold Coast Hospital and Health Service. Using the modified Delphi approach, these clinicians will be asked to independently rank the organ function parameters that they deem to be the most clinically relevant marker of organ function. The survey will be performed online. The highest ranked outcomes will then be included in the data analysis.

### **Assessment of risk of bias in included studies**

Two authors will independently appraise the quality of the included studies, using the [Newcastle Ottawa Scale](#) (NOS) for assessing risk of bias in cohort studies. Disagreements will be resolved by discussion or a third reviewer. Factors that will be assessed include:

- Representativeness of the exposed cohort
- Selection of the non-exposed cohort
- Ascertainment of exposure
- Demonstration that the outcome of interest was not present at start of study
- Comparability of cohorts on the basis of design or analysis
- Assessment of outcome
- Adequate duration of follow up
- Adequate follow up of cohorts
- Other important biases

Risk of bias for randomised controlled trials will be assessed using the Cochrane Risk of Bias tool which assesses the following domains:

- Random sequence generation
- Allocation concealment
- Blinding of participants and personnel
- Blinding of outcome assessors
- Incomplete outcome data
- Selective reporting
- Other biases

### **Measures of treatment effect**

The data will first be extracted and analysed descriptively using graphs, to determine whether it is appropriate to pool the data. If deemed appropriate, RevMan will be used to pool the data. For continuous outcomes the mean difference (MD) (or standardized mean difference if studies use different measuring scales) and corresponding 95% confidence interval (95% CI) will be calculated. The data will be extracted and reported as an annual percentage decline. The overall rates of decline and corresponding



confidence intervals will be presented visually in a forest plot. If the data allow, we will also extract and stratify decade-specific decline rates. If this is not possible, then a descriptive synthesis will be presented.

### Subgroup analysis

We plan to re-analyse the data by organ function parameter if more than one marker is deemed appropriate as a useful measure of a certain organ's function (e.g. location of bone mineral density measurement). We will compare decline rates of different ethnicities and sex. As well as this we will separately analyse the data of those develop disease during the course of the study and those who had known risk factors. We will also look for birth cohort effects if the data allow (i.e. cohorts who have suffered deprivation early in life may show more functional decline later in life).

### Dealing with missing data

If data were missing from studies published within the last 5 years, we plan to contact authors via email to obtain the individual data set.

### Assessment of heterogeneity

Statistical heterogeneity may be assessed by calculating the chi squared score, as well as the  $I^2$  statistic. Studies will be judged to have significant heterogeneity if the P value for the chi squared test was  $<0.1$ . If using mixed models, we will report random effects as the measure of heterogeneity. The degree of heterogeneity will be determined by the  $I^2$  as follows (as specified in the Cochrane handbook):

- 0% to 40%: might not be important;
- 30% to 60%: may represent moderate heterogeneity;
- 50% to 90%: may represent substantial heterogeneity;
- 75% to 100%: considerable heterogeneity.

If there is considerable heterogeneity within the studies for the outcome, reasons for heterogeneity will be explored and results will not be pooled.

### Assessment of reporting biases

If available, outcomes reported in the protocol of the studies will be judged against the final publication to assess for any reporting bias. If there are any discrepancies, these will be reported. If study protocols are not available, the outcomes listed in the methodology of the study will compared to the final reported outcomes in the results. Authors will be contacted if there are any missing data or outcomes.

### Data synthesis

Where data are sufficiently similar and are thought to be clinically relevant by a group of geriatricians and primary care physicians, we will pool the study estimates of organ function. A random effects model will be used in the meta-analysis to allow for between study differences.

### Sensitivity analysis

Sensitivity analyses will be conducted to check whether heterogeneity in the overall outcomes can be explained by either of the following:

- the presence of low quality studies with high risk of bias (assessed as having one or more domains with a high risk of bias according to the NOS).
- duration of the study or time-points of measurement



## DISCUSSION

This review aims to provide an estimate of annual organ function decline across various organs that is part of normal aging in people without symptomatic disease. This will enable clinicians to distinguish age-appropriate laboratory test results from values which represent increased risk of disease. It is more reasonable to assess the health of individuals with reference to others in their age cohorts, not in comparison to healthy young individuals. Determining these 'normal' changes with aging will also avoid the psychological consequences of disease-labelling and side effects of unnecessary drug treatment. Researchers will be able to use this data to plan more longitudinal studies in different cohorts and investigate additional factors that affect changes in organ function. Further research will also be required to determine whether it is possible to regain function and if so, up until what point this is possible once a risk factor is removed.

## ABBREVIATIONS

**FEV<sub>1</sub>** – Forced expiratory volume in 1 second

**eGFR** - estimated glomerular filtration rate

**NOS**- Newcastle Ottawa Scale

**DECLARATIONS****ETHICS APPROVAL AND CONSENT TO PARTICIPATE**

Not applicable

**CONSENT FOR PUBLICATION**

Not applicable

**AVAILABILITY OF DATA AND MATERIAL**

Not applicable

**COMPETING INTERESTS**

The authors declare that they have no competing interests.

**FUNDING**

PG has received funding from the Australian National Health and Medical Research Council (Australia Fellowship No. 527500 and Program Grant No 633003). The funders had no role in design and conduct of the study; collection, management, analysis, and interpretation of the data; and preparation, review, or approval of the manuscript.

**AUTHORS' CONTRIBUTIONS**

ETT, SS and PG were involved in the conception and design of the review. ETT developed the search strategy. ETT drafted the manuscript, and MG, SS, KB and PG contributed to the drafting of the review protocol. All authors approved the final version of the article.

**ACKNOWLEDGEMENTS**

The authors would like to thank Justin Clark for his assistance with the literature search, as well as Richard Stevens and Ben Feakins for their advice on statistical analysis.

## SEARCH STRATEGY

| Query number | Medline Search                                                                                                                                                                                                                                                                                                                                                                                                                                                                                                                                                                                                                                                                                                                                                                                                                                                                                                                                                                                                                                                                                                                                                                                                                                                                                                             |
|--------------|----------------------------------------------------------------------------------------------------------------------------------------------------------------------------------------------------------------------------------------------------------------------------------------------------------------------------------------------------------------------------------------------------------------------------------------------------------------------------------------------------------------------------------------------------------------------------------------------------------------------------------------------------------------------------------------------------------------------------------------------------------------------------------------------------------------------------------------------------------------------------------------------------------------------------------------------------------------------------------------------------------------------------------------------------------------------------------------------------------------------------------------------------------------------------------------------------------------------------------------------------------------------------------------------------------------------------|
| 1            | ("Aging/ethnology"[Mesh] OR "Aging/physiology"[Mesh] OR "Age-related"[tiab] OR "Age related"[tiab] OR Function[tiab] OR Healthy[tiab])                                                                                                                                                                                                                                                                                                                                                                                                                                                                                                                                                                                                                                                                                                                                                                                                                                                                                                                                                                                                                                                                                                                                                                                     |
| 2            | (Decline[tiab] OR Declines[tiab] OR Declined[tiab] OR Decrease[tiab] OR Decreased[tiab])                                                                                                                                                                                                                                                                                                                                                                                                                                                                                                                                                                                                                                                                                                                                                                                                                                                                                                                                                                                                                                                                                                                                                                                                                                   |
| 3            | ("Middle Aged"[Mesh] OR "Aged"[Mesh] OR Aged[tiab] OR Elderly[tiab] OR Old[tiab] OR Older[tiab])                                                                                                                                                                                                                                                                                                                                                                                                                                                                                                                                                                                                                                                                                                                                                                                                                                                                                                                                                                                                                                                                                                                                                                                                                           |
| 4            | ("Longitudinal Studies"[Mesh] OR Longitudinal[tiab] OR Trend[tiab] OR Trends[tiab] OR Trajectories[tiab] OR Trajectory[tiab] OR "Follow-up"[tiab] OR "Follow up"[tiab] OR "Rate of"[tiab] OR "Rates of"[tiab])                                                                                                                                                                                                                                                                                                                                                                                                                                                                                                                                                                                                                                                                                                                                                                                                                                                                                                                                                                                                                                                                                                             |
| 5            | (Cohort[tiab] OR Observational[tiab] OR Prospective[tiab] OR Compared[tiab] OR Investigated[tiab] OR Evaluating[tiab] OR Analysis[tiab] OR Analyzed[tiab] OR Statistics[tiab] OR Data[tiab] OR Baseline[tiab])                                                                                                                                                                                                                                                                                                                                                                                                                                                                                                                                                                                                                                                                                                                                                                                                                                                                                                                                                                                                                                                                                                             |
| 6            | (Humans[Mesh] OR Humans[tiab] OR Human[tiab] OR Population[tiab])                                                                                                                                                                                                                                                                                                                                                                                                                                                                                                                                                                                                                                                                                                                                                                                                                                                                                                                                                                                                                                                                                                                                                                                                                                                          |
| 7            | 1 - 6                                                                                                                                                                                                                                                                                                                                                                                                                                                                                                                                                                                                                                                                                                                                                                                                                                                                                                                                                                                                                                                                                                                                                                                                                                                                                                                      |
| 8            | "Lung Volume Measurement"[tiab] OR "Lung Capacities"[tiab] OR "Respiratory Function Test"[tiab] OR "Pulmonary Function Tests"[tiab] OR "Lung Function Tests"[tiab] OR "Lung Function Test"[tiab] OR "Pulmonary Function Test"[tiab] OR "Airway Resistance"[tiab] OR "Blood Gas Analysis"[tiab] OR "Oximetry"[tiab] OR "Bronchial Provocation Tests"[tiab] OR "Capnography"[tiab] OR "Exercise Test"[tiab] OR "Lung Compliance"[tiab] OR "Lung Volume Measurements"[tiab] OR "Total Lung Capacity"[tiab] OR "Maximal Respiratory Pressures"[tiab] OR "Plethysmography, Whole Body"[tiab] OR "Pulmonary Gas Exchange"[tiab] OR "Pulmonary Diffusing Capacity"[tiab] OR "Ventilation-Perfusion Ratio"[tiab] OR "Pulmonary Ventilation"[tiab] OR "Forced Expiratory Flow Rates"[tiab] OR "Forced Expiratory Volume"[tiab] OR "Maximal Voluntary Ventilation"[tiab] OR "Spirometry"[tiab] OR "Bronchspirometry"[tiab] OR "Work of Breathing"[tiab] OR "Maximal Expiratory Flow Rate"[tiab] OR "Maximal Expiratory Flow-Volume Curves"[tiab] OR "Maximal Midexpiratory Flow Rate"[tiab] OR "Peak Expiratory Flow Rate"[tiab] OR "Expiratory Volume, Forced"[tiab] OR "Expiratory Volumes, Forced"[tiab] OR "FEVt"[tiab] OR "Forced Vital Capacity, Timed"[tiab] OR "Timed Vital Capacity"[tiab] OR "Capacity, Timed Vital"[tiab] |

|    |                                                                                                                                                                                                                                                                                                                                                                                                                                                                                                                                                                                                                                                                                                                                                                                                                                                                                                                                                                                                                                                                                                                                                                                                                                                                                                                                                                                                                                                                                                                                                                                                                                                                                   |
|----|-----------------------------------------------------------------------------------------------------------------------------------------------------------------------------------------------------------------------------------------------------------------------------------------------------------------------------------------------------------------------------------------------------------------------------------------------------------------------------------------------------------------------------------------------------------------------------------------------------------------------------------------------------------------------------------------------------------------------------------------------------------------------------------------------------------------------------------------------------------------------------------------------------------------------------------------------------------------------------------------------------------------------------------------------------------------------------------------------------------------------------------------------------------------------------------------------------------------------------------------------------------------------------------------------------------------------------------------------------------------------------------------------------------------------------------------------------------------------------------------------------------------------------------------------------------------------------------------------------------------------------------------------------------------------------------|
| 9  | <p>“Liver Function Test”[tiab] OR “Serum Albumin”[tiab] OR “Plasma Albumin”[tiab] OR “Bilirubin”[tiab] OR “Prothrombin Time”[tiab] OR “International Normalized Ratios”[tiab] OR “International Normalized Ratio”[tiab] OR “INR”[tiab] OR “Thrombotest”[tiab] OR “Quick Test”[tiab] OR “Transaminases”[tiab] OR “Aminotransferases”[tiab] OR “Alanine Transaminase”[tiab] OR “Aspartate Aminotransferases”[tiab] OR “Aspartate Aminotransferase, Cytoplasmic”[tiab] OR “Aspartate Aminotransferase, Mitochondrial”[tiab] OR “Liver/anatomy and histology”[Mesh] OR “Liver/diagnostic imaging”[Mesh] OR “Echography”[tiab] OR “Ultrasound Imaging”[tiab] OR “Ultrasonic Imaging”[tiab] OR “Medical Sonography”[tiab] OR “Diagnostic Ultrasound”[tiab] OR “Diagnostic Ultrasounds”[tiab] OR “Echotomography”[tiab] OR “Ultrasonic Diagnosis”[tiab] OR “Computer Echotomography”[tiab] OR “Ultrasonic Tomography”[tiab] OR “Organ Size”[tiab] OR “Organ Weight”[tiab] OR “Organ Volume”[tiab]</p>                                                                                                                                                                                                                                                                                                                                                                                                                                                                                                                                                                                                                                                                                    |
| 10 | <p>“Blood Sugar”[tiab] OR “Sugar, Blood”[tiab] OR “Glucose, Blood”[tiab] OR “Blood Glucose”[tiab] OR “Glucose Tolerance Test”[tiab] OR “Glucose Tolerance Tests”[tiab] OR “Oral Glucose Tolerance Test”[tiab] OR “OGTT”[tiab] OR “Oral Glucose Tolerance”[tiab] OR “Intravenous Glucose Tolerance Test”[tiab] OR “Intravenous Glucose Tolerance”[tiab] OR “Endocrine Diagnostic Technic”[tiab] OR “Endocrine Diagnostic Technique”[tiab] OR “Endocrine Diagnostic Techniques”[tiab] OR “Blood Glucose Self Monitoring”[tiab] OR “Blood Glucose Self-Monitoring”[tiab] OR “Blood Sugar Self Monitoring”[tiab] OR “Blood Sugar Self-Monitoring”[tiab] OR “Home Blood Glucose Monitoring”[tiab] OR “Glucose Clamp Technique”[tiab] OR “Glucose Clamp Techniques”[tiab] OR “Glucose Clamp Technic”[tiab] OR “Glucose Clamp Technics”[tiab] OR “Glucose Clamping”[tiab] OR “Euglycaemic Clamping”[tiab] OR “Euglycaemic Clamp”[tiab] OR “Euglycaemic Clamps”[tiab] OR “Glucose Clamp”[tiab] OR “Glucose Clamps”[tiab] OR “Hb A1a+b”[tiab] OR “Hb A1c”[tiab] OR “HbA1”[tiab] OR “Glycosylated Hemoglobin A”[tiab] OR “Hb A1”[tiab] OR “Glycohemoglobin A”[tiab] OR “Hemoglobin A(1)”[tiab] OR “Hemoglobin, Glycosylated A1b”[tiab] OR “Hb A1b”[tiab] OR “Hemoglobin, Glycosylated A1a-1”[tiab] OR “Hemoglobin, Glycosylated A1a 1”[tiab] OR “Hb A1a-1”[tiab] OR “Hb A1a-2”[tiab] OR “Glycosylated Hemoglobin”[tiab] OR “Glycated Hemoglobins”[tiab] OR “Insulin Resistance”[tiab] OR “Insulin Sensitivity”[tiab] OR “Langerhans Islets”[tiab] OR “Pancreatic Islets”[tiab] OR “Endocrine Pancreas”[tiab] OR “Langerhans Islands”[tiab] OR “Islet Cells”[tiab] OR “Islet Cell”[tiab]</p> |
| 11 | <p>“Bone Densities”[tiab] OR “Bone Density”[tiab] OR “Bone Mineral Density”[tiab] OR “Bone Mineral Densities”[tiab] OR “Bond Mineral Content”[tiab] OR “Bone Mineral Contents”[tiab] OR “Photon Absorptiometry”[tiab] OR X-Ray Densitometry”[tiab] OR “Single-Photon Absorptiometry”[tiab] OR “Dual Energy X-Ray Absorptiometry Scan”[tiab] OR “DXA Scan”[tiab] OR “DEXA Scan”[tiab] OR “Dual-Photon Absorptiometry”[tiab] OR “Dual Energy Radiographic Absorptiometry”[tiab] OR “X-Ray Absorptiometry”[tiab]</p>                                                                                                                                                                                                                                                                                                                                                                                                                                                                                                                                                                                                                                                                                                                                                                                                                                                                                                                                                                                                                                                                                                                                                                 |
| 12 | 7 AND 8                                                                                                                                                                                                                                                                                                                                                                                                                                                                                                                                                                                                                                                                                                                                                                                                                                                                                                                                                                                                                                                                                                                                                                                                                                                                                                                                                                                                                                                                                                                                                                                                                                                                           |
| 13 | 7 AND 9                                                                                                                                                                                                                                                                                                                                                                                                                                                                                                                                                                                                                                                                                                                                                                                                                                                                                                                                                                                                                                                                                                                                                                                                                                                                                                                                                                                                                                                                                                                                                                                                                                                                           |
| 14 | 7 AND 10                                                                                                                                                                                                                                                                                                                                                                                                                                                                                                                                                                                                                                                                                                                                                                                                                                                                                                                                                                                                                                                                                                                                                                                                                                                                                                                                                                                                                                                                                                                                                                                                                                                                          |
| 15 | 7 AND 11                                                                                                                                                                                                                                                                                                                                                                                                                                                                                                                                                                                                                                                                                                                                                                                                                                                                                                                                                                                                                                                                                                                                                                                                                                                                                                                                                                                                                                                                                                                                                                                                                                                                          |

## REFERENCES

1. Mathers C, Stevens G, Mahanani W, Ho J, Fat D, Hogan D. WHO methods and data sources for country-level causes of death 2000-2015. Geneva: Department of Information, Evidence and Research WHO; 2017.
2. Boss G, Seegmiller J. Age-Related Physiological Changes and their Clinical Significance. *West J Med* 1981;135:434-40.
3. Aalami O, Fang T, Song H, Nacamuli R. Physiological Features of Aging Persons. *Arch Surg* 2003;138:1068-76.
4. Rodríguez-Rodero S, Fernández-Morera J, Menéndez-Torre E, Calvanese V, Fernández A, Fraga M. Aging Genetics and Aging. *Aging and Disease* 2011;2:186-95. .
5. Vásárhelyi B, Debreczeni L. Lab test findings in the elderly. *J Int Fed Clin Chem* 2017;28:328-32.
6. Navaratnarajah A, Jackson S. The physiology of ageing. *Medicine* 2017;45:6-10.
7. Knudson R, Lebowitz M, Holberg C, Burrows B. Changes in the normal maximal expiratory flow-volume curve with growth and aging. *Am Rev Respir Dis* 1983;127:725-34.
8. Zaugg M, Lucchinetti E. Respiratory Function in the Elderly. *Anesthesiol Clin North America* 2000;18:47-58.
9. Vestal R, McGuire E, Tobin J, al e. Aging and ethanol metabolism *Clin Pharmacol Ther* 1977;21:343-54.
10. Adkins R, Marshall B. Anatomic and physiologic aspects of aging. . In: Adkins R, Scott H, eds. *Surgical Care for the Elderly*. 2nd ed. Philadelphia: Lippincott-Raven Publishers; 1998:xxi531.
11. Van Tongeren J, Cluysenaer O, Lamers C, De Mulder P, Yap S. Causes of hypoalbuminemia. In: Yap S, Majoor C, van Tongeren J, eds. *Clinical Aspects of Albumin*. Dordrecht: Springer; 1978.
12. George J, Byth K, Farrell G. Age but not gender selectively affects expression of individual cytochrome P450 proteins in human liver. . *Biochem Pharmacol* 1995;50:727-30.
13. Loi C, Parker B, Cusack B, Vestal R. Aging and drug interactions. III. Individual and combined effects of cimetidine and cimetidine and ciprofloxacin on theophylline metabolism in healthy male and female nonsmokers. *J Pharmacol Exp Ther* 1997;280:627-37.
14. McConnell J, Buchanan K, Ardill J, Stout R. Glucose tolerance in the elderly: the role of insulin and its receptor. *Eur J Clin Invest* 1982;12:55-61.
15. Meigs J, Muller D, Nathan D, Blake D, R A. The natural history of progression from normal glucose tolerance to type 2 diabetes in the Baltimore Longitudinal Study of Aging. *Diabetes* 2003;52:1475-84.
16. Pathy J, Sinclair A, Morley J, Vellas B. *Pathy's Principles and Practice of Geriatric Medicine*. Oxford: UK: John Wiley & Sons, Ltd; 2012.
17. Levey A, Stevens L, Coresh J. Conceptual model of CKD: applications and implications. *Am J Kidney Dis* 2009;53:S4-16.
18. Stevens L, Viswanathan G, Weiner D. CKD and ESRD in the Elderly: Current Prevalence, Future Projections and Clinical Significance. *Adv Chronic Kidney Dis* 2010;17:293-301.
19. Moynihan R, Glasscock R, Doust J. Chronic kidney disease controversy: how expanding definitions are unnecessarily labelling many people as diseased. *BMJ* 2013;347:f4298.

## SEARCH STRATEGY

| Query number | Medline Search                                                                                                                                                                                                                                                                                                                                                                                                                                                                                                                                                                                                                                                                                                                                                                                                                                                                                                                                                                                                                                                                                                                                                                                                                                                                                                             | Hits     |
|--------------|----------------------------------------------------------------------------------------------------------------------------------------------------------------------------------------------------------------------------------------------------------------------------------------------------------------------------------------------------------------------------------------------------------------------------------------------------------------------------------------------------------------------------------------------------------------------------------------------------------------------------------------------------------------------------------------------------------------------------------------------------------------------------------------------------------------------------------------------------------------------------------------------------------------------------------------------------------------------------------------------------------------------------------------------------------------------------------------------------------------------------------------------------------------------------------------------------------------------------------------------------------------------------------------------------------------------------|----------|
| 1            | ("Aging/ethnology"[Mesh] OR "Aging/physiology"[Mesh] OR "Age-related"[tiab] OR "Age related"[tiab] OR Function[tiab] OR Healthy[tiab])                                                                                                                                                                                                                                                                                                                                                                                                                                                                                                                                                                                                                                                                                                                                                                                                                                                                                                                                                                                                                                                                                                                                                                                     | 2500185  |
| 2            | (Decline[tiab] OR Declines[tiab] OR Declined[tiab] OR Decrease[tiab] OR Decreased[tiab])                                                                                                                                                                                                                                                                                                                                                                                                                                                                                                                                                                                                                                                                                                                                                                                                                                                                                                                                                                                                                                                                                                                                                                                                                                   | 2111642  |
| 3            | ("Middle Aged"[Mesh] OR "Aged"[Mesh] OR Aged[tiab] OR Elderly[tiab] OR Old[tiab] OR Older[tiab])                                                                                                                                                                                                                                                                                                                                                                                                                                                                                                                                                                                                                                                                                                                                                                                                                                                                                                                                                                                                                                                                                                                                                                                                                           | 5507544  |
| 4            | ("Longitudinal Studies"[Mesh] OR Longitudinal[tiab] OR Trend[tiab] OR Trends[tiab] OR Trajectories[tiab] OR Trajectory[tiab] OR "Follow-up"[tiab] OR "Follow up"[tiab] OR "Rate of"[tiab] OR "Rates of"[tiab])                                                                                                                                                                                                                                                                                                                                                                                                                                                                                                                                                                                                                                                                                                                                                                                                                                                                                                                                                                                                                                                                                                             | 1973987  |
| 5            | (Cohort[tiab] OR Observational[tiab] OR Prospective[tiab] OR Compared[tiab] OR Investigated[tiab] OR Evaluating[tiab] OR Analysis[tiab] OR Analyzed[tiab] OR Statistics[tiab] OR Data[tiab] OR Baseline[tiab])                                                                                                                                                                                                                                                                                                                                                                                                                                                                                                                                                                                                                                                                                                                                                                                                                                                                                                                                                                                                                                                                                                             | 9089651  |
| 6            | (Humans[Mesh] OR Humans[tiab] OR Human[tiab] OR Population[tiab])                                                                                                                                                                                                                                                                                                                                                                                                                                                                                                                                                                                                                                                                                                                                                                                                                                                                                                                                                                                                                                                                                                                                                                                                                                                          | 17712772 |
| 7            | 1 - 6                                                                                                                                                                                                                                                                                                                                                                                                                                                                                                                                                                                                                                                                                                                                                                                                                                                                                                                                                                                                                                                                                                                                                                                                                                                                                                                      | 22913    |
| 8            | "Lung Volume Measurement"[tiab] OR "Lung Capacities"[tiab] OR "Respiratory Function Test"[tiab] OR "Pulmonary Function Tests"[tiab] OR "Lung Function Tests"[tiab] OR "Lung Function Test"[tiab] OR "Pulmonary Function Test"[tiab] OR "Airway Resistance"[tiab] OR "Blood Gas Analysis"[tiab] OR "Oximetry"[tiab] OR "Bronchial Provocation Tests"[tiab] OR "Capnography"[tiab] OR "Exercise Test"[tiab] OR "Lung Compliance"[tiab] OR "Lung Volume Measurements"[tiab] OR "Total Lung Capacity"[tiab] OR "Maximal Respiratory Pressures"[tiab] OR "Plethysmography, Whole Body"[tiab] OR "Pulmonary Gas Exchange"[tiab] OR "Pulmonary Diffusing Capacity"[tiab] OR "Ventilation-Perfusion Ratio"[tiab] OR "Pulmonary Ventilation"[tiab] OR "Forced Expiratory Flow Rates"[tiab] OR "Forced Expiratory Volume"[tiab] OR "Maximal Voluntary Ventilation"[tiab] OR "Spirometry"[tiab] OR "Bronchspirometry"[tiab] OR "Work of Breathing"[tiab] OR "Maximal Expiratory Flow Rate"[tiab] OR "Maximal Expiratory Flow-Volume Curves"[tiab] OR "Maximal Midexpiratory Flow Rate"[tiab] OR "Peak Expiratory Flow Rate"[tiab] OR "Expiratory Volume, Forced"[tiab] OR "Expiratory Volumes, Forced"[tiab] OR "FEVt"[tiab] OR "Forced Vital Capacity, Timed"[tiab] OR "Timed Vital Capacity"[tiab] OR "Capacity, Timed Vital"[tiab] | 81312    |
| 9            | 7 AND 8                                                                                                                                                                                                                                                                                                                                                                                                                                                                                                                                                                                                                                                                                                                                                                                                                                                                                                                                                                                                                                                                                                                                                                                                                                                                                                                    | 1131     |

## MOOSE Checklist for Meta-analyses of Observational Studies

| Item No                                     | Recommendation                                                                                                                                                                                                                                                               | Reported on Page No    |
|---------------------------------------------|------------------------------------------------------------------------------------------------------------------------------------------------------------------------------------------------------------------------------------------------------------------------------|------------------------|
| Reporting of background should include      |                                                                                                                                                                                                                                                                              |                        |
| 1                                           | Problem definition                                                                                                                                                                                                                                                           | 4                      |
| 2                                           | Hypothesis statement                                                                                                                                                                                                                                                         | 4-5                    |
| 3                                           | Description of study outcome(s)                                                                                                                                                                                                                                              | 5-6                    |
| 4                                           | Type of exposure or intervention used                                                                                                                                                                                                                                        | 6                      |
| 5                                           | Type of study designs used                                                                                                                                                                                                                                                   | 6                      |
| 6                                           | Study population                                                                                                                                                                                                                                                             | 6                      |
| Reporting of search strategy should include |                                                                                                                                                                                                                                                                              |                        |
| 7                                           | Qualifications of searchers (eg, librarians and investigators)                                                                                                                                                                                                               | 5, Title page          |
| 8                                           | Search strategy, including time period included in the synthesis and key words                                                                                                                                                                                               | 5-6, Appendix 1        |
| 9                                           | Effort to include all available studies, including contact with authors                                                                                                                                                                                                      | 5-6                    |
| 10                                          | Databases and registries searched                                                                                                                                                                                                                                            | 5-6                    |
| 11                                          | Search software used, name and version, including special features used (eg, explosion)                                                                                                                                                                                      | 5-6                    |
| 12                                          | Use of hand searching (eg, reference lists of obtained articles)                                                                                                                                                                                                             | 5-6                    |
| 13                                          | List of citations located and those excluded, including justification                                                                                                                                                                                                        | 9, Figure 1            |
| 14                                          | Method of addressing articles published in languages other than English                                                                                                                                                                                                      | 6                      |
| 15                                          | Method of handling abstracts and unpublished studies                                                                                                                                                                                                                         | -                      |
| 16                                          | Description of any contact with authors                                                                                                                                                                                                                                      | 8                      |
| Reporting of methods should include         |                                                                                                                                                                                                                                                                              |                        |
| 17                                          | Description of relevance or appropriateness of studies assembled for assessing the hypothesis to be tested                                                                                                                                                                   | 5-9                    |
| 18                                          | Rationale for the selection and coding of data (eg, sound clinical principles or convenience)                                                                                                                                                                                | 6-8                    |
| 19                                          | Documentation of how data were classified and coded (eg, multiple raters, blinding and interrater reliability)                                                                                                                                                               | 6-7                    |
| 20                                          | Assessment of confounding (eg, comparability of cases and controls in studies where appropriate)                                                                                                                                                                             | 7-8                    |
| 21                                          | Assessment of study quality, including blinding of quality assessors, stratification or regression on possible predictors of study results                                                                                                                                   | 7-8                    |
| 22                                          | Assessment of heterogeneity                                                                                                                                                                                                                                                  | 8-9                    |
| 23                                          | Description of statistical methods (eg, complete description of fixed or random effects models, justification of whether the chosen models account for predictors of study results, dose-response models, or cumulative meta-analysis) in sufficient detail to be replicated | 8-9                    |
| 24                                          | Provision of appropriate tables and graphics                                                                                                                                                                                                                                 | Table 1-3, Figures 2-5 |
| Reporting of results should include         |                                                                                                                                                                                                                                                                              |                        |
| 25                                          | Graphic summarizing individual study estimates and overall estimate                                                                                                                                                                                                          | Figure 2,3             |
| 26                                          | Table giving descriptive information for each study included                                                                                                                                                                                                                 | Table 1                |
| 27                                          | Results of sensitivity testing (eg, subgroup analysis)                                                                                                                                                                                                                       | 15,16, Figure 2,3      |
| 28                                          | Indication of statistical uncertainty of findings                                                                                                                                                                                                                            | -                      |

| Item No                                 | Recommendation                                                                                                            | Reported on Page No |
|-----------------------------------------|---------------------------------------------------------------------------------------------------------------------------|---------------------|
| Reporting of discussion should include  |                                                                                                                           |                     |
| 29                                      | Quantitative assessment of bias (eg, publication bias)                                                                    | 18, Figure 4,5      |
| 30                                      | Justification for exclusion (eg, exclusion of non-English language citations)                                             | Figure 1            |
| 31                                      | Assessment of quality of included studies                                                                                 | 18,19               |
| Reporting of conclusions should include |                                                                                                                           |                     |
| 32                                      | Consideration of alternative explanations for observed results                                                            | 18-22               |
| 33                                      | Generalization of the conclusions (ie, appropriate for the data presented and within the domain of the literature review) | 21,22               |
| 34                                      | Guidelines for future research                                                                                            | 22                  |
| 35                                      | Disclosure of funding source                                                                                              | 23                  |

From: Stroup DF, Berlin JA, Morton SC, et al, for the Meta-analysis Of Observational Studies in Epidemiology (MOOSE) Group. Meta-analysis of Observational Studies in Epidemiology. A Proposal for Reporting. *JAMA*. 2000;283(15):2008-2012. doi: 10.1001/jama.283.15.2008.



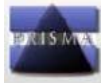

# PRISMA 2009 Checklist

| Section/topic                      | #  | Checklist item                                                                                                                                                                                                                                                                                              | Reported on page # |
|------------------------------------|----|-------------------------------------------------------------------------------------------------------------------------------------------------------------------------------------------------------------------------------------------------------------------------------------------------------------|--------------------|
| <b>TITLE</b>                       |    |                                                                                                                                                                                                                                                                                                             |                    |
| Title                              | 1  | Identify the report as a systematic review, meta-analysis, or both.                                                                                                                                                                                                                                         | 1                  |
| <b>ABSTRACT</b>                    |    |                                                                                                                                                                                                                                                                                                             |                    |
| Structured summary                 | 2  | Provide a structured summary including, as applicable: background; objectives; data sources; study eligibility criteria, participants, and interventions; study appraisal and synthesis methods; results; limitations; conclusions and implications of key findings; systematic review registration number. | 3,4                |
| <b>INTRODUCTION</b>                |    |                                                                                                                                                                                                                                                                                                             |                    |
| Rationale                          | 3  | Describe the rationale for the review in the context of what is already known.                                                                                                                                                                                                                              | 4,5                |
| Objectives                         | 4  | Provide an explicit statement of questions being addressed with reference to participants, interventions, comparisons, outcomes, and study design (PICOS).                                                                                                                                                  | 5                  |
| <b>METHODS</b>                     |    |                                                                                                                                                                                                                                                                                                             |                    |
| Protocol and registration          | 5  | Indicate if a review protocol exists, if and where it can be accessed (e.g., Web address), and, if available, provide registration information including registration number.                                                                                                                               | 5                  |
| Eligibility criteria               | 6  | Specify study characteristics (e.g., PICOS, length of follow-up) and report characteristics (e.g., years considered, language, publication status) used as criteria for eligibility, giving rationale.                                                                                                      | 5,6                |
| Information sources                | 7  | Describe all information sources (e.g., databases with dates of coverage, contact with study authors to identify additional studies) in the search and date last searched.                                                                                                                                  | 5,6                |
| Search                             | 8  | Present full electronic search strategy for at least one database, including any limits used, such that it could be repeated.                                                                                                                                                                               | Appendix 1         |
| Study selection                    | 9  | State the process for selecting studies (i.e., screening, eligibility, included in systematic review, and, if applicable, included in the meta-analysis).                                                                                                                                                   | 6                  |
| Data collection process            | 10 | Describe method of data extraction from reports (e.g., piloted forms, independently, in duplicate) and any processes for obtaining and confirming data from investigators.                                                                                                                                  | 7                  |
| Data items                         | 11 | List and define all variables for which data were sought (e.g., PICOS, funding sources) and any assumptions and simplifications made.                                                                                                                                                                       | 7                  |
| Risk of bias in individual studies | 12 | Describe methods used for assessing risk of bias of individual studies (including specification of whether this was done at the study or outcome level), and how this information is to be used in any data synthesis.                                                                                      | 7,8                |
| Summary measures                   | 13 | State the principal summary measures (e.g., risk ratio, difference in means).                                                                                                                                                                                                                               | 8                  |
| Synthesis of results               | 14 | Describe the methods of handling data and combining results of studies, if done, including measures of consistency (e.g., I <sup>2</sup> ) for each meta-analysis.                                                                                                                                          | 8,9                |

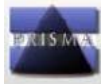

# PRISMA 2009 Checklist

Page 1 of 2

| Section/topic                 | #  | Checklist item                                                                                                                                                                                                                                                                  | Reported on page #          |
|-------------------------------|----|---------------------------------------------------------------------------------------------------------------------------------------------------------------------------------------------------------------------------------------------------------------------------------|-----------------------------|
| Risk of bias across studies   | 15 | Specify any assessment of risk of bias that may affect the cumulative evidence (e.g., publication bias, selective reporting within studies).                                                                                                                                    | 7,8                         |
| Additional analyses           | 16 | Describe methods of additional analyses (e.g., sensitivity or subgroup analyses, meta-regression), if done, indicating which were pre-specified.                                                                                                                                | 9                           |
| <b>RESULTS</b>                |    |                                                                                                                                                                                                                                                                                 |                             |
| Study selection               | 17 | Give numbers of studies screened, assessed for eligibility, and included in the review, with reasons for exclusions at each stage, ideally with a flow diagram.                                                                                                                 | 9, Figure 1                 |
| Study characteristics         | 18 | For each study, present characteristics for which data were extracted (e.g., study size, PICOS, follow-up period) and provide the citations.                                                                                                                                    | 9                           |
| Risk of bias within studies   | 19 | Present data on risk of bias of each study and, if available, any outcome level assessment (see item 12).                                                                                                                                                                       | 18, Figure 4                |
| Results of individual studies | 20 | For all outcomes considered (benefits or harms), present, for each study: (a) simple summary data for each intervention group (b) effect estimates and confidence intervals, ideally with a forest plot.                                                                        | 9-16, Table 2,3, Figure 2,3 |
| Synthesis of results          | 21 | Present results of each meta-analysis done, including confidence intervals and measures of consistency.                                                                                                                                                                         | N/A                         |
| Risk of bias across studies   | 22 | Present results of any assessment of risk of bias across studies (see Item 15).                                                                                                                                                                                                 | 18, Figure 5                |
| Additional analysis           | 23 | Give results of additional analyses, if done (e.g., sensitivity or subgroup analyses, meta-regression [see Item 16]).                                                                                                                                                           | 16                          |
| <b>DISCUSSION</b>             |    |                                                                                                                                                                                                                                                                                 |                             |
| Summary of evidence           | 24 | Summarize the main findings including the strength of evidence for each main outcome; consider their relevance to key groups (e.g., healthcare providers, users, and policy makers).                                                                                            | 18                          |
| Limitations                   | 25 | Discuss limitations at study and outcome level (e.g., risk of bias), and at review-level (e.g., incomplete retrieval of identified research, reporting bias).                                                                                                                   | 19,20                       |
| Conclusions                   | 26 | Provide a general interpretation of the results in the context of other evidence, and implications for future research.                                                                                                                                                         | 21-22                       |
| <b>FUNDING</b>                |    |                                                                                                                                                                                                                                                                                 |                             |
| Funding                       | 27 | Describe sources of funding for the systematic review and other support (e.g., supply of data); role of funders for the systematic review.<br>Review only - <a href="http://bmjopen.bmj.com/site/about/guidelines.xhtml">http://bmjopen.bmj.com/site/about/guidelines.xhtml</a> | 23                          |

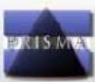

# PRISMA 2009 Checklist

1  
2  
3  
4  
5  
6  
7  
8  
9  
10  
11  
12  
13  
14  
15  
16  
17  
18  
19  
20  
21  
22  
23  
24  
25  
26  
27  
28  
29  
30  
31  
32  
33  
34  
35  
36  
37  
38  
39  
40  
41  
42  
43  
44  
45  
46  
47

*From:* Moher D, Liberati A, Tetzlaff J, Altman DG, The PRISMA Group (2009). Preferred Reporting Items for Systematic Reviews and Meta-Analyses: The PRISMA Statement. PLoS Med 6(7): e1000097. doi:10.1371/journal.pmed1000097

For more information, visit: [www.prisma-statement.org](http://www.prisma-statement.org).

Page 2 of 2

For peer review only

# BMJ Open

## The rate of normal lung function decline in ageing adults: a systematic review of prospective cohort studies

|                                 |                                                                                                                                                                                                                                                                                                                                                                                                                                                                                                                                                                                                                                                                                                                                                                       |
|---------------------------------|-----------------------------------------------------------------------------------------------------------------------------------------------------------------------------------------------------------------------------------------------------------------------------------------------------------------------------------------------------------------------------------------------------------------------------------------------------------------------------------------------------------------------------------------------------------------------------------------------------------------------------------------------------------------------------------------------------------------------------------------------------------------------|
| Journal:                        | <i>BMJ Open</i>                                                                                                                                                                                                                                                                                                                                                                                                                                                                                                                                                                                                                                                                                                                                                       |
| Manuscript ID                   | bmjopen-2018-028150.R1                                                                                                                                                                                                                                                                                                                                                                                                                                                                                                                                                                                                                                                                                                                                                |
| Article Type:                   | Research                                                                                                                                                                                                                                                                                                                                                                                                                                                                                                                                                                                                                                                                                                                                                              |
| Date Submitted by the Author:   | 01-Mar-2019                                                                                                                                                                                                                                                                                                                                                                                                                                                                                                                                                                                                                                                                                                                                                           |
| Complete List of Authors:       | Thomas, Elizabeth; Bond University Faculty of Health Sciences and Medicine, Centre for Research in Evidence-Based Practice; Gold Coast University Hospital<br>Guppy, Michelle; Bond University Faculty of Health Sciences and Medicine, Centre for Research in Evidence-Based Practice; University of New England, School of Rural Medicine<br>Straus, Sharon; University of Toronto Department of Medicine; St. Michael's Hospital, Li Ka Shing Knowledge Institute<br>Bell, Katy; University of Sydney, School of Public Health; Bond University Faculty of Health Sciences and Medicine, Centre for Research in Evidence-Based Practice<br>Glasziou, Paul; Bond University Faculty of Health Sciences and Medicine, Centre for Research in Evidence-Based Practice |
| <b>Primary Subject Heading</b>: | Respiratory medicine                                                                                                                                                                                                                                                                                                                                                                                                                                                                                                                                                                                                                                                                                                                                                  |
| Secondary Subject Heading:      | Geriatric medicine                                                                                                                                                                                                                                                                                                                                                                                                                                                                                                                                                                                                                                                                                                                                                    |
| Keywords:                       | Ageing, age-related decline, lung function tests, cohort studies, systematic review                                                                                                                                                                                                                                                                                                                                                                                                                                                                                                                                                                                                                                                                                   |
|                                 |                                                                                                                                                                                                                                                                                                                                                                                                                                                                                                                                                                                                                                                                                                                                                                       |

SCHOLARONE™  
Manuscripts

1  
2 **The rate of normal lung function decline in ageing adults: a systematic**  
3  
4  
5 **review of prospective cohort studies**  
6  
7  
8  
9  
10  
11  
12

13 **Authors**

14  
15 Dr. Elizabeth T Thomas<sup>1,2</sup>, Medical intern

16  
17 Dr. Michelle Guppy<sup>1,3</sup>, Associate Professor of General Practice, PhD candidate

18  
19 Prof. Sharon Straus<sup>4,5</sup>, Professor of Medicine, Director of Knowledge Translation Program

20  
21 Dr. Katy JL Bell<sup>1,6</sup> NHMRC Senior Research Fellow

22  
23 Prof. Paul Glasziou<sup>1</sup>, Professor of Evidence-Based Medicine, Director of the Centre for Research  
24  
25 in Evidence-Based Practice  
26  
27  
28  
29  
30  
31

32 **Author affiliations**

- 33  
34  
35 1. Centre for Research in Evidence-Based Practice, Bond University, Robina QLD 4226,  
36  
37 Australia  
38  
39 2. Gold Coast University Hospital, 1 Hospital Boulevard, Southport QLD 4215, Australia  
40  
41 3. School of Rural Medicine, University of New England, Armidale NSW 2351, Australia  
42  
43 4. Department of Medicine, University of Toronto, Toronto, Ontario, Canada  
44  
45 5. Li Ka Shing Knowledge Institute of St. Michael's Hospital, Toronto, Ontario, Canada  
46  
47 6. Sydney School of Public Health, Sydney Medical School, Edward Ford Building (A27),  
48  
49 University of Sydney, Sydney, Australia  
50  
51  
52

53 **Corresponding Author:** Elizabeth T Thomas. Email: ethomas@bond.edu.au  
54  
55  
56  
57  
58  
59  
60

1 **Word Count: 3825**  
2  
3  
4  
5  
6

7 **Key Words** Ageing, age-related decline, lung function tests, cohort studies, systematic review  
8  
9  
10  
11  
12  
13  
14  
15  
16  
17  
18  
19  
20  
21  
22  
23  
24  
25  
26  
27  
28  
29  
30  
31  
32  
33  
34  
35  
36  
37  
38  
39  
40  
41  
42  
43  
44  
45  
46  
47  
48  
49  
50  
51  
52  
53  
54  
55  
56  
57  
58  
59  
60

For peer review only

## ABSTRACT

**Objective** To conduct a systematic review investigating the normal age-related changes in lung function in adults without known lung disease.

**Design** Systematic review.

**Data sources** MEDLINE, Embase and CINAHL were searched for eligible studies from inception to February 12, 2019, supplemented by manual searches of reference lists and clinical trial registries.

**Eligibility criteria** We planned to include prospective cohort studies and randomised controlled trials (control arms) that measured changes in lung function over time in asymptomatic adults without known respiratory disease.

**Data Extraction and Synthesis** Two authors independently determined the eligibility of studies, extracted data, and assessed the risk of bias of included studies using the modified Newcastle Ottawa Scale.

**Results** From 4385 records screened, we identified 16 cohort studies with 31,099 participants. All included studies demonstrated decline in lung function - FEV<sub>1</sub>, FVC and peak expiratory flow rate (PEFR) with age. In studies with longer follow-up (>10 years), rates of FEV<sub>1</sub> decline ranged from 17.7 to 46.4 ml/year (median 22.4 ml/year).

1 Overall, men had faster absolute rates of decline (median 43.5ml/year) compared to  
2  
3  
4 women (median 30.5ml/year). Differences in relative FEV<sub>1</sub> change, however, were not  
5  
6  
7 observed between men and women. FEV<sub>1</sub>/FVC change was reported in only one study,  
8  
9  
10 declining by 0.29% per year. An age-specific analysis suggested the rate of FEV<sub>1</sub>  
11  
12  
13 function decline may accelerate with each decade of age.  
14  
15  
16

17  
18 **Conclusions** Lung function - FEV<sub>1</sub>, FVC and PEFV<sub>1</sub> - decline with age in individuals  
19  
20  
21 without known lung disease. The definition of chronic airway disease may need to be  
22  
23  
24 reconsidered to allow for normal ageing, and ensure that people likely to benefit from  
25  
26  
27 interventions are identified rather than healthy people who may be harmed by potential  
28  
29  
30 overdiagnosis and overtreatment. The first step would be to apply age, sex and  
31  
32  
33 ethnicity-adjusted FEV<sub>1</sub>/FVC thresholds to the disease definition of COPD.  
34  
35  
36  
37  
38  
39

40 **Registration** PROSPERO CRD42018087066  
41  
42  
43  
44  
45  
46  
47  
48  
49  
50  
51  
52  
53  
54  
55  
56  
57  
58  
59  
60



## Strengths and limitations

- This is the first review to provide estimates for the median decline in spirometry measures including the FEV<sub>1</sub>, FVC and the FEV<sub>1</sub>/FVC ratio based on longitudinal data.
- We used a modified version of the Newcastle-Ottawa Scale to assess risk of bias.
- The review may be prone to volunteer bias, and therefore may underestimate lung function decline among asymptomatic people.
- Only one study specifically reported the change of the FEV<sub>1</sub>/FVC ratio with age, and we did not have access to unpublished individual participant data to allow calculation of the FEV<sub>1</sub>/FVC ratio change where this was not reported.

## INTRODUCTION

In 2016, the World Health Organization estimated that chronic obstructive pulmonary disease (COPD) affected 251 million people worldwide, with its prevalence continuing to rise with an ageing population.<sup>1</sup> Current guidelines in UK<sup>2</sup>, Australasia<sup>3</sup>, Europe and the United States<sup>4</sup> recommend that COPD is diagnosed if an individual has symptoms such as dyspnoea or sputum production, if they have known risk factors such as smoking or biomass fuel exposure, and if they demonstrate post-bronchodilator airflow limitation on spirometry. Airflow limitation on spirometry is defined when the ratio of forced expiratory volume in one second (FEV<sub>1</sub>) to forced vital capacity (FVC) is less than 70% after bronchodilator administration.<sup>2,3</sup> However, this arbitrary diagnostic threshold has attracted criticism as it does not adjust for age or sex.<sup>5-10</sup>

Ageing is invariably accompanied by changes in lung function due to factors such as loss of lung elasticity, weakened muscles of respiration, and decreased surface area for alveolar gas exchange. Several published cross-sectional studies<sup>9 11-13</sup> and longitudinal studies<sup>14 15</sup> report that lung function parameters such as FEV<sub>1</sub> and FVC decline with age.

1  
2  
3  
4  
5 The 2018 update of the Global Initiative for Chronic Obstructive Lung Disease (GOLD)  
6  
7  
8 criteria<sup>16</sup> continues to suggest the use of the fixed ratio rather than an FEV<sub>1</sub> or FVC that  
9  
10  
11 lies outside of the lower limit of normal (LLN) range. While the fixed ratio threshold may  
12  
13  
14 be simple for clinicians to use, it does not consider that lung function measurements  
15  
16 may change with age and vary with gender and ethnicity. Many laboratory tests already  
17  
18  
19 have different reference range values for different ages and electronic spirometry  
20  
21  
22 machines do the same. The GOLD criteria acknowledge that this arbitrary fixed  
23  
24  
25 threshold may overdiagnose normal healthy older adults as diseased and  
26  
27  
28 underdiagnose some younger people with disease as healthy.<sup>17 18</sup>  
29  
30  
31  
32  
33  
34  
35  
36  
37  
38  
39  
40 Longitudinal studies need to be identified so that normal changes in lung function can  
41  
42  
43 be calculated for different ages. Monitoring change could be used in practice to  
44  
45  
46 complement a single time point measurement to identify people who are not within the  
47  
48  
49 expected normal range. We aimed to perform a systematic review of prospective cohort  
50  
51  
52  
53 studies and randomised controlled trials, that examined changes in lung function with  
54  
55  
56  
57 age in asymptomatic individuals with no known lung disease who have never smoked.  
58  
59

1 This knowledge would enable further work to develop age-, sex- and ethnicity-specific  
2  
3  
4  
5 estimates that may be especially useful in a primary care setting. This implies that  
6  
7  
8 people are only diagnosed with COPD if their spirometry measurements fall outside of  
9  
10  
11 the normal range for their age, sex and ethnicity, rather than on the basis of a fixed  
12  
13  
14  
15 value.  
16  
17  
18  
19  
20  
21

## 22 **METHODS**

### 23 **Protocol registration**

24  
25  
26 The protocol for this review was drafted in accordance with the PRISMA statement and  
27  
28  
29 the Meta-analyses of Observational Studies in Epidemiology (MOOSE) reporting  
30  
31  
32 guidelines. It was registered on PROSPERO (CRD42018087066) and is available from  
33  
34  
35  
36  
37  
38  
39 [http://www.crd.york.ac.uk/PROSPERO/display\\_record.php?ID=CRD42018087066](http://www.crd.york.ac.uk/PROSPERO/display_record.php?ID=CRD42018087066), see  
40  
41  
42  
43 Supplementary File 1.  
44  
45  
46  
47  
48  
49

### 50 **Search strategy and inclusion criteria**

51  
52  
53 We conducted electronic searches of MEDLINE, EMBASE and CINAHL databases from  
54  
55  
56 inception through to February 2019, using the search strategy specified in Supplementary File 2.  
57  
58  
59

1 This was developed with an information specialist. Electronic searches were complemented by  
2  
3 manual searching through reference lists of studies that were identified for potential inclusion as  
4  
5 well as backwards and forward searching. We also searched the WHO Clinical Trials registry  
6  
7 and ClinicalTrials.gov registries using the key words “normal ageing”, “lung function decline”,  
8  
9 “FEV1 decline”, “FVC decline” and “lung decline”.  
10  
11  
12  
13  
14

15 We included cohort studies and also planned to include the control arms of randomised  
16  
17 controlled trials that measured the decline of lung function in an ageing population. The  
18  
19 inclusion criteria were:  
20  
21

- 22 • Longitudinal studies that followed some or all of the adult participants past the  
23  
24 age of 65 years;  
25  
26  
27
- 28 • Three or more measurements of lung function undertaken;  
29  
30
- 31 • Studies with a follow-up period of three years or longer; and  
32  
33
- 34 • Studies that measure lung function (i.e. FEV<sub>1</sub>, FVC, peak expiratory flow rate  
35  
36 [PEFR]).  
37  
38  
39  
40  
41  
42

43 We excluded studies if the participants did not meet the pre-specified age criteria; if the  
44  
45 population of interest were reported to include smokers or those with risk factors such  
46  
47 as occupational inhalation; if participants were reported to have respiratory symptoms  
48  
49 such as wheeze, dyspnea or chronic cough; or if the study included participants with  
50  
51 known respiratory disease such as asthma or COPD.  
52  
53  
54  
55  
56  
57  
58  
59  
60

## Study selection and data extraction

Two authors (ETT, MG) independently screened the titles and abstracts of studies identified in the initial search for eligibility. Prior to commencing screening, a small subset of 50 titles were screened by the two reviewers as a calibration exercise to check for >80% agreement. Similarly, after screening, a calibration exercise was conducted for screening the full texts of the studies and targeting >80% agreement. The remaining full texts were retrieved and reviewed independently by the authors to determine eligibility for inclusion. Non-English publications were translated using Google Translate or with the assistance of a translator. Disagreements were resolved by consensus through discussion or with a third reviewer (PG). If there were multiple reports of the same study, the most recent publication with longest length of follow up was selected for inclusion, and if the two studies had a similar length of follow up then the study with the largest sample size was included. Two authors independently extracted data from the studies. The Excel data extraction form was piloted using ten studies prior to data extraction as a calibration exercise to check for adequate agreement (>80%) between the reviewers. Any disagreements were resolved by

1 consensus or with a third reviewer. Extracted measures included study setting, year and  
2  
3  
4 duration, participant eligibility criteria, sample size, participants demographics (ethnicity,  
5  
6  
7  
8 gender, baseline age), any known risk factors or exposures, baseline lung function, lung  
9  
10  
11 function measurements, number and frequency of measurements, average length of  
12  
13  
14 follow up and loss to follow up. We also aimed to report the proportion of the cohort that  
15  
16  
17  
18 subsequently developed symptoms or disease during follow-up.  
19  
20  
21  
22  
23  
24  
25

26 We assessed risk of bias of included studies using the six items of the Newcastle  
27  
28  
29 Ottawa Scale (NOS)<sup>19</sup> for assessing quality of included cohort studies. Disagreements  
30  
31  
32 were resolved by discussion or a third reviewer.  
33  
34  
35

36 Assessed factors included:

- 37  
38  
39 • Representativeness of the exposed cohort (e.g. low risk: random selection; high  
40  
41  
42 risk: non-random selection e.g. volunteer sampling)  
43  
44  
45
- 46  
47 • Ascertainment of exposure – age (e.g. low risk: from medical records; high risk:  
48  
49  
50 self-reported)  
51  
52  
53  
54  
55  
56  
57  
58  
59  
60

- Demonstration that the outcome of interest was not present at start of study (e.g. low risk: participants were excluded on the basis of demonstrated airflow limitation; high risk: if participants were not screened)
- Assessment of outcome (e.g. low risk: spirometry; high risk: subjective measure of lung function)
- Adequate duration of follow up (e.g. low risk: equal to or greater than three years follow-up; high risk: less than three years of follow-up)
- Adequate follow up of cohorts (e.g. low risk: less than 20% attrition, loss to follow-up explained; high risk: greater than 20% attrition, unexplained loss to follow-up)

Studies were assessed as good quality if they had low risk of bias in all six domains, moderate quality if they had low risk of bias in four or five domains and low quality if they had low risk of bias for three or fewer domains.

## Statistical analysis



1 For each study cohort, we extracted the annual decline rates for each lung function  
2  
3  
4  
5 measure. If these were not reported, we calculated crude decline rates for all reported  
6  
7  
8 lung function measure by subtracting the final measure from the initial measure and  
9  
10  
11 dividing the result by the duration of follow up. If these data were not available, we  
12  
13  
14 determined crude rates of decline from the graphs provided or contacted the study  
15  
16  
17 authors for original data. The data were first analysed descriptively using graphs to  
18  
19  
20 determine whether it was appropriate to pool the data. For continuous outcomes, the  
21  
22  
23 mean difference (MD) (or standardized mean difference if studies used different  
24  
25  
26 measuring scales) and standard deviations were calculated. The data were reported as  
27  
28  
29 an annual decline (unit/year). The overall rates of decline and corresponding 95%  
30  
31  
32 confidence intervals were presented in a forest plot. We planned to perform a meta-  
33  
34  
35 analysis to pool the estimates of decline.  
36  
37  
38  
39  
40  
41  
42  
43  
44  
45  
46

47 We presented the data by functional parameter ( $FEV_1$ ,  $FEV_{0.75}$ , FVC, PEF), and  
48  
49  
50 planned to compare annual decline rates by sex and ethnicity in absolute and relative  
51  
52  
53 terms, where data were available. We also extracted and presented age-specific decline  
54  
55  
56 rates by decade of age if studies reported these data. We planned to separately analyse  
57  
58  
59

1 the data of those who developed disease during follow-up. We also planned to examine  
2  
3  
4  
5 for birth cohort effects if the data were available. Sensitivity analyses were planned for  
6  
7  
8 study duration greater than ten years.  
9

## 10 11 12 13 14 15 **Patient and Public Involvement**

16  
17  
18 Patients were not involved in the design, data extraction or data analysis of this review.  
19  
20  
21  
22  
23  
24

## 25 26 **RESULTS**

### 27 28 29 **Study characteristics**

30  
31  
32 From searches of Medline, Embase and CINAHL performed on February 12 2019, we  
33  
34  
35 identified 4331 records. An additional 54 records were identified from clinical trials  
36  
37  
38 registries and reference list searches. From these, we retrieved 143 papers for full text  
39  
40  
41 review; 115 of these did not meet our selection criteria and a further twelve were  
42  
43  
44 removed as duplicates. In total, 16 studies<sup>20-35</sup> were included in the systematic review  
45  
46  
47  
48  
49 (with one study contributing two data sets<sup>29</sup>) (Figure 1). The studies included 31,099  
50  
51  
52 participants and were conducted between 1959 and 2014 ranging from five to thirty  
53  
54  
55 years in duration (Table 1).  
56  
57  
58  
59  
60

1  
2  
3  
4  
5  
6  
7  
8  
9  
10  
11  
12  
13  
14  
15  
16  
17  
18  
19  
20  
21  
22  
23  
24  
25  
26  
27  
28  
29  
30  
31  
32  
33  
34  
35  
36  
37  
38  
39  
40  
41  
42  
43  
44  
45  
46  
47  
48  
49  
50  
51  
52  
53  
54  
55  
56  
57  
58  
59  
60

For peer review only

**Table 1. Characteristics of included studies**

| Source ID          | Cohort                                                            | Study duration (years) | Study centres | Study setting | Study period | Sample Size | Mean age of sample (years, SD) | %Male  | Outcome                                  | Time points of measurement                                                                        |
|--------------------|-------------------------------------------------------------------|------------------------|---------------|---------------|--------------|-------------|--------------------------------|--------|------------------------------------------|---------------------------------------------------------------------------------------------------|
| Ahmadi-Abhari 2014 | EPIC-Norfolk                                                      | 13                     | 1             | England       | 1993 - 2011  | 8062        | 58.5** (9.2)                   | 45     | FEV <sub>1</sub> , FVC                   | 3 (0, 4, 13 years)                                                                                |
| Bartholomew 1998   | Busselton Population Health Surveys                               | 6                      | 1             | Australia     | 1966 - 1981  | 1499        | 41.6 (16.1)                    | 29.7   | FEV <sub>1</sub> , FVC                   | 3 (0, 3, 6 years)                                                                                 |
| Burchfiel 1995     | Kuakini Honolulu Heart Program                                    | 6                      | 1             | USA           | 1965 - 1975  | 1248        | 54.6*                          | 100    | FEV <sub>1</sub>                         | 3 (0, 2, 6 years)                                                                                 |
| Burrows 1986       | Tucson Epidemiological study of obstructive Lung Disease (TESOLD) | 9.6                    | 1             | USA           | 1972 - 1983  | 466         | 48.3 (19.1)                    | 33.9   | FEV <sub>1</sub>                         | mean 5.2                                                                                          |
| Griffith 2001      | Cardiovascular Health Study                                       | 7                      | 4             | USA           | 1989 - 1997  | 5242        | 73.5 / 72.7 (5.5)/ (5.2)       | 42.4   | FEV <sub>1</sub> , FVC                   | 3 (0, 4, 7 years)                                                                                 |
| Lange 1998         | Copenhagen City Heart Study                                       | 15                     | 1             | Denmark       | 1976 - 1994  | 4305        | 51.7^                          | 37     | FEV <sub>1</sub>                         | 3- Cycle 1: 1976 - 1978, Cycle 2: 1981-1983, Cycle 3: 1991-1994                                   |
| Liao 2015          | Framingham Heart Study                                            | 17                     | 1             | USA           | 1983 - 2007  | 543         | 47.6** (10.5)                  | 38.1** | FEV <sub>1</sub> , FEV <sub>1</sub> /FVC | 5 - Cycle 1: 1983-1987, Cycle 2: 1987-1991, Cycle 3: 1991-1995, Cycle 4: 1995-1998, Cycle 5: 2007 |
| Luoto 2018         | Good Aging in Skåne                                               | 13.5                   | 1             | Sweden        | 2001 – 2014  | 387         | 70.6** (10.6)                  | 44.2** | FEV <sub>1</sub> , FVC                   | Aged <80: every 6 years<br>Aged 80 or over: every 3 years                                         |
| Maselko 2006       | MacArthur Successful Aging study                                  | 7                      | 3             | USA           | 1988-1995    | 544         | 74                             | 31.8   | PEFR                                     | 3 (0, 3, 7 years),                                                                                |

|    |               |                                                                                 |                                |   |                                                                                     |             |      |                                          |      |                        |                                                                    |
|----|---------------|---------------------------------------------------------------------------------|--------------------------------|---|-------------------------------------------------------------------------------------|-------------|------|------------------------------------------|------|------------------------|--------------------------------------------------------------------|
| 1  |               |                                                                                 |                                |   |                                                                                     |             |      |                                          |      |                        |                                                                    |
| 2  |               |                                                                                 |                                |   |                                                                                     |             |      |                                          |      |                        |                                                                    |
| 3  |               |                                                                                 |                                |   |                                                                                     |             |      |                                          |      |                        |                                                                    |
| 4  | Pearson 1998  | Baltimore<br>Longitudinal<br>Study of Aging                                     | Males: 11.5<br>Females:<br>5.7 | 1 | USA                                                                                 | 1962 - 1991 | 173  | 42.4                                     | 52.6 | FEV <sub>1</sub>       | 4.6 / 3 (every 2 years)                                            |
| 5  |               |                                                                                 |                                |   |                                                                                     |             |      |                                          |      |                        |                                                                    |
| 6  |               |                                                                                 |                                |   |                                                                                     |             |      |                                          |      |                        |                                                                    |
| 7  | Pelkonen 2001 | Seven<br>Countries<br>Study                                                     | 30                             | 2 | Finland                                                                             | 1959 - 1989 | 200  | 47.6<br>(30 years)<br>49.4<br>(15 years) | 100  | FEV <sub>0.75</sub>    | 6 (0,5,10,15,20,25,30 years)                                       |
| 8  |               |                                                                                 |                                |   |                                                                                     |             |      |                                          |      |                        |                                                                    |
| 9  |               |                                                                                 |                                |   |                                                                                     |             |      |                                          |      |                        |                                                                    |
| 10 |               |                                                                                 |                                |   |                                                                                     |             |      |                                          |      |                        |                                                                    |
| 11 | Proctor 2006  | Origins of<br>Variance in the<br>Old-Old<br>(OCTO-Twin)                         | 8                              | 1 | Sweden                                                                              | 1991 – 2003 |      | 83.2<br>(2.8)                            | 33.0 | PEFR                   | 5 (0,2,4,6,8 years)                                                |
| 12 |               |                                                                                 |                                |   |                                                                                     |             |      |                                          |      |                        |                                                                    |
| 13 |               |                                                                                 |                                |   |                                                                                     |             |      |                                          |      |                        |                                                                    |
| 14 |               |                                                                                 |                                |   |                                                                                     |             |      |                                          |      |                        |                                                                    |
| 15 | Sherman 1992  | Six Cities study<br>of Air Pollution<br>and Health                              | 12                             | 6 | USA                                                                                 | 1974-1989   | 1486 | 47.2 / 48.2**<br>(12.3) / (12.5)         | 32.0 | FEV <sub>1</sub> , FVC | 4 (0,3,6,12 years)                                                 |
| 16 |               |                                                                                 |                                |   |                                                                                     |             |      |                                          |      |                        |                                                                    |
| 17 |               |                                                                                 |                                |   |                                                                                     |             |      |                                          |      |                        |                                                                    |
| 18 | Triebner 2017 | European<br>Community<br>Respiratory<br>Health Survey                           | 19.7 <sup>^</sup>              | 8 | Denmark;<br>Germany;<br>Spain; France;<br>Iceland;<br>Norway;<br>Sweden;<br>Estonia | 1991-2012   | 648  | 36.2** <sup>^</sup>                      | 0    | FEV <sub>1</sub> , FVC | 3 - Cycle 1: 1991-1994<br>Cycle 2: 1998-2002<br>Cycle 3: 2010-2012 |
| 19 |               |                                                                                 |                                |   |                                                                                     |             |      |                                          |      |                        |                                                                    |
| 20 |               |                                                                                 |                                |   |                                                                                     |             |      |                                          |      |                        |                                                                    |
| 21 |               |                                                                                 |                                |   |                                                                                     |             |      |                                          |      |                        |                                                                    |
| 22 |               |                                                                                 |                                |   |                                                                                     |             |      |                                          |      |                        |                                                                    |
| 23 |               |                                                                                 |                                |   |                                                                                     |             |      |                                          |      |                        |                                                                    |
| 24 | Wang 2004     | -                                                                               | 5                              | 1 | USA                                                                                 | 1985 - 1992 | 71   | 37 <sup>^</sup> **<br>(19-65)            | 100  | FEV <sub>1</sub>       | 3-11; every 6 months                                               |
| 25 |               |                                                                                 |                                |   |                                                                                     |             |      |                                          |      |                        |                                                                    |
| 26 | Xu 1995       | Dutch Study on<br>Asthma and<br>Chronic<br>Obstructive<br>Pulmonary<br>Diseases | 24                             | 2 | The<br>Netherlands                                                                  | 1965-1990   | 6293 | 35.06 / 44.5<br>(10.5) / (11.4)          | 22.5 | FEV <sub>1</sub>       | 9 (every 3 years)                                                  |
| 27 |               |                                                                                 |                                |   |                                                                                     |             |      |                                          |      |                        |                                                                    |
| 28 |               |                                                                                 |                                |   |                                                                                     |             |      |                                          |      |                        |                                                                    |
| 29 |               |                                                                                 |                                |   |                                                                                     |             |      |                                          |      |                        |                                                                    |
| 30 |               |                                                                                 |                                |   |                                                                                     |             |      |                                          |      |                        |                                                                    |
| 31 |               |                                                                                 |                                |   |                                                                                     |             |      |                                          |      |                        |                                                                    |

32 \*Calculated from taking the midpoint of each age group and averaging according to number of people in each age group

33 \*\* estimates include smokers

34 <sup>^</sup> Median (Range)

35 # / # indicates Males / Females

36

37

38

39

40

41

42

43

44

45

46

## Overall age-related lung function decline

A meta-analysis was not performed due to substantial heterogeneity across the included studies, and a narrative synthesis was undertaken instead. Thirteen studies reported changes in FEV<sub>1</sub> as an outcome. All studies demonstrated a decline with age, with overall rates of decline from each study ranging from 9.9 to 56.0ml/year (median 29.2ml/year). Seven of these studies examined the differences in rates of decline between males and females, showing greater absolute FEV<sub>1</sub> decline in males (median 43.5ml/year) than females (median 30.5ml/year) (Table 2, Figure 2). Relative rates of FEV<sub>1</sub> decline were calculated for men in eight studies and women in six studies that reported baseline FEV<sub>1</sub> values. There was no statistically significant difference between men and women's relative change of FEV<sub>1</sub> from baseline (p=0.7). FEV<sub>0.75</sub> decline was reported in one study.<sup>29</sup> This study provided two data sets (follow up after 15 years, 30 years) provided in Table 2.

Five studies reported changes in FVC, with rate of decline estimates ranging from 14.1ml/year in the youngest cohort<sup>32</sup> (median age 36.2 years) to 65.6ml/year in the older cohort<sup>24</sup> (mean age 73.0 years). In studies that measured both FEV<sub>1</sub> and FVC over

1  
2 time, there was a greater decline in FEV<sub>1</sub> than FVC in two studies, and greater decline  
3  
4  
5 in FVC than FEV<sub>1</sub> in three studies. These measures are average estimates across study  
6  
7  
8 participants and do not enable calculation of individuals' FEV<sub>1</sub>/FVC ratios. In the one  
9  
10  
11  
12 study where individuals' FEV<sub>1</sub>/FVC ratios were reported as an outcome<sup>26</sup>, there was a  
13  
14  
15 decline by 0.29% per year.  
16

17  
18  
19 PEFR was reported as an outcome in two studies,<sup>27 30</sup> which showed decline rates  
20  
21  
22 ranging from -6.6L/min/year in females to -11.5L/min/year in males.  
23  
24  
25  
26  
27  
28  
29  
30  
31  
32  
33  
34  
35  
36  
37  
38  
39  
40  
41  
42  
43  
44  
45  
46  
47  
48  
49  
50  
51  
52  
53  
54  
55  
56  
57  
58  
59  
60

Table 2. Reported annual rates of absolute and relative lung function decline (FEV<sub>1</sub>, FVC, PEF, FEV<sub>0.75</sub>) in 16 prospective cohort

| Source ID                   | Mean age of sample (years, SD) | Duration          | Sample size |        | Mean absolute unit decline/yr (SD) |                             | Overall relative decline (%) |        | Variables reported to alter the rate of change                                               |
|-----------------------------|--------------------------------|-------------------|-------------|--------|------------------------------------|-----------------------------|------------------------------|--------|----------------------------------------------------------------------------------------------|
|                             |                                |                   | MALE        | FEMALE | MALE                               | FEMALE                      | MALE                         | FEMALE |                                                                                              |
| <b>FEV<sub>1</sub> (mL)</b> |                                |                   |             |        |                                    |                             |                              |        |                                                                                              |
| Ahmadi 2014                 | 58.5**<br>(9.2)                | 13                | 3621        | 4441   | -17.7<br>(78.6)                    |                             |                              |        | Smoking; CRP categories                                                                      |
| Bartholomew 1998            | 41.6<br>(16.1)                 | 6                 | 445         | 1054   | -43.5<br>(100.4)                   | -30.5<br>(144.8)            | 1.1                          | 1.2    | Smoking; Increased BMI                                                                       |
| Burchfiel 1995              | 54.6^                          | 6                 | 1248        |        | -21.6°                             |                             | 0.7                          |        | Smoking status                                                                               |
| Burrows 1986                | 48.3<br>(19.1)                 | 9.6               | 158         | 308    | -10.3°<br>(6.3)                    | -9.1°<br>(5.7)              |                              |        | -                                                                                            |
| Griffith 2001               | 73.0**<br>(5.3)                | 7                 | 1976**      | 2604** | -52.3<br>(3.1) <sup>a</sup>        | -47.0<br>(2.8) <sup>a</sup> | 1.9                          | 1.7    | Caucasian vs African American (only 2 measurements), Smoking                                 |
| Lange 1998                  | 51.7^                          | 15                | 1592        | 2713   | -23.5<br>(10.4)                    | -18.3<br>(10.0)             | 0.8                          | 0.8    | Asthmatics vs non-asthmatic, Smoker vs non smoker                                            |
| Liao 2015                   | 47.4**<br>(10.6)               | 17                | 207***      | 336*** | -25.8<br>(14.0)**                  |                             |                              |        | Smoking, Height, Less vs more likely dust exposure                                           |
| Luoto 2018                  | 70.6**<br>(10.6)               | 13                | 171***      | 216*** | -46.4°<br>(47.7)                   |                             | 2.2°                         |        | Smoking, female sex (relative), male sex (absolute), elevated CRP (relative), BMI (absolute) |
| Pearson 1998                | 42.4                           | 11.5/5.7          | 91          | 82     | -43.5                              | -35.1                       | 1.0                          | 1.3    | -                                                                                            |
| Sherman 1992                | 47.9<br>(12.4)                 | 12                | 475         | 1011   | -32.8<br>(29.5)                    | -27.5<br>(20.4)             | 1.0                          | 1.1    | Smoking                                                                                      |
| Triebner 2017               | 36.2 <sup>†</sup>              | 19.7 <sup>†</sup> |             | 648    |                                    | -22.4<br>(36.4)             |                              |        | Menopausal status, BMI                                                                       |
| Wang 2004                   | 37 <sup>†</sup><br>(19-65)     | 5                 | 71          |        | -56.0<br>(45.0)                    |                             | 1.3                          |        |                                                                                              |



|    |                                |                   |                   |        |        |                    |                    |     |     |                                                                                                     |
|----|--------------------------------|-------------------|-------------------|--------|--------|--------------------|--------------------|-----|-----|-----------------------------------------------------------------------------------------------------|
| 1  |                                |                   |                   |        |        |                    |                    |     |     |                                                                                                     |
| 2  |                                |                   |                   |        |        |                    |                    |     |     |                                                                                                     |
| 3  | <b>Xu 1995*</b>                | 42.4 <sup>^</sup> | 24                | 1418   | 4875   | -28.3              | -16.0              | 0.7 | 0.5 |                                                                                                     |
| 4  |                                | (11.9)            |                   |        |        | (138.5)            | (135.5)            |     |     |                                                                                                     |
| 5  |                                |                   |                   |        |        |                    |                    |     |     |                                                                                                     |
| 6  | <b>FVC (mL)</b>                |                   |                   |        |        |                    |                    |     |     |                                                                                                     |
| 7  | <b>Ahmadi 2014</b>             | 58.5**            | 13                | 3621   | 4441   | -31.1              |                    |     |     | Smoking; CRP categories                                                                             |
| 8  |                                | (9.2)             |                   |        |        | (118.1)            |                    |     |     |                                                                                                     |
| 9  | <b>Bartholomew 1998</b>        | 41.6              | 6                 | 445    | 1054   | -47.2              | -36.0              | 1.0 | 1.1 | Smoking                                                                                             |
| 10 |                                | (16.1)            |                   |        |        | (104.0)            | (154.5)            |     |     |                                                                                                     |
| 11 |                                |                   |                   |        |        |                    |                    |     |     |                                                                                                     |
| 12 | <b>Griffith 2001</b>           | 73.0**            | 7                 | 1976** | 2604** | -78.4 <sup>a</sup> | -65.6 <sup>a</sup> | 2.9 | 2.4 | Caucasian vs African American (only 2 measurements), Smoking                                        |
| 13 |                                | (5.3)             |                   |        |        | (4.2)              | (3.8)              |     |     |                                                                                                     |
| 14 |                                |                   |                   |        |        |                    |                    |     |     |                                                                                                     |
| 15 | <b>Luoto 2018</b>              | 70.6**            | 13                | 171*** | 216*** | -43.7 <sup>°</sup> |                    | 1.7 |     | Smoking, female sex (relative), male sex (absolute), low educational level, elevated CRP (relative) |
| 16 |                                | (10.6)            |                   |        |        | (67.2)             |                    |     |     |                                                                                                     |
| 17 |                                |                   |                   |        |        |                    |                    |     |     |                                                                                                     |
| 18 |                                |                   |                   |        |        |                    |                    |     |     |                                                                                                     |
| 19 | <b>Triebner 2017</b>           | 36.2 <sup>†</sup> | 19.7 <sup>†</sup> |        | 648    |                    | -14.1              |     |     | Menopausal status, BMI                                                                              |
| 20 |                                |                   |                   |        |        |                    | (42.8)             |     |     |                                                                                                     |
| 21 | <b>FEV<sub>1</sub>/FVC</b>     |                   |                   |        |        |                    |                    |     |     |                                                                                                     |
| 22 | <b>Liao 2015</b>               | 47.4**            | 17                | 207**  | 336**  | -0.0029            |                    |     |     | Smoking, Less vs more likely dust exposure                                                          |
| 23 |                                | (10.6)            |                   |        |        | (0.0023)**         |                    |     |     |                                                                                                     |
| 24 |                                |                   |                   |        |        |                    |                    |     |     |                                                                                                     |
| 25 | <b>FEV<sub>0.75</sub> (mL)</b> |                   |                   |        |        |                    |                    |     |     |                                                                                                     |
| 26 | <b>Pelkonen 2001(a)</b>        | 47.6              | 30                | 100    |        | -34.8              |                    | 1.0 |     | Smoking                                                                                             |
| 27 |                                |                   |                   |        |        |                    |                    |     |     |                                                                                                     |
| 28 | <b>Pelkonen 2001(b)</b>        | 49.4              | 15                | 200    |        | -46.4              |                    | 1.4 |     | Smoking                                                                                             |
| 29 |                                |                   |                   |        |        |                    |                    |     |     |                                                                                                     |
| 30 | <b>PEFR (L/min)</b>            |                   |                   |        |        |                    |                    |     |     |                                                                                                     |
| 31 | <b>Maselko 2006</b>            | 74                | 7                 | 173    | 371    | -8.6               | -8.6               | 2.0 | 2.3 | Smoking                                                                                             |
| 32 |                                |                   |                   |        |        | (30.3)             | (34.7)             |     |     |                                                                                                     |
| 33 |                                |                   |                   |        |        |                    |                    |     |     |                                                                                                     |
| 34 |                                |                   |                   |        |        |                    |                    |     |     |                                                                                                     |
| 35 | <b>Proctor 2006*</b>           | 83.2              | 8                 | 191    | 388    | -11.5              | -6.6               | 2.9 | 2.4 |                                                                                                     |
| 36 |                                | (2.8)             |                   |        |        | (2.2) <sup>a</sup> | (1.1) <sup>a</sup> |     |     |                                                                                                     |
| 37 |                                |                   |                   |        |        |                    |                    |     |     |                                                                                                     |

\*A non-linear relationship was also reported in the authors' data analysis.

\*\* Based on estimates including smokers

\*\*\*Estimates based on the assumption that there was an equal proportion of non-smokers and smokers who were male/female.

<sup>^</sup>Average derived from taking the midpoint value of each age group and calculating the overall mean age according to proportion in each group.

1  
2  
3 † median

4 SDs were calculated from 95% CI by subtracting the highest from the lowest confidence interval and dividing the result by 3.92.

5 ## indicates Male/Female

6 °Estimates adjust for covariates including height and age

7 ªmean (Standard error)  
8  
9  
10  
11  
12  
13  
14  
15  
16  
17  
18  
19  
20  
21  
22  
23  
24  
25  
26  
27  
28  
29  
30  
31  
32  
33  
34  
35  
36  
37  
38  
39  
40  
41  
42  
43  
44  
45  
46  
47

For peer review only

## Age-specific lung function decline by decade of age

The age-specific rates of FEV<sub>1</sub> change by decade of age were extracted or calculated from three studies.<sup>22 23 28 35</sup> In all but one study, estimates of decline increased from the fourth (age 30-40 years) to eighth decades of life (Table 3). One study could not be included in this comparative analysis as they included smokers and reported decline rates at the end of study follow up (rather than baseline age).<sup>35</sup> This study reported that the rates of relative decline increase from the seventh (-1.7%/year) through to the tenth decade (-3.1%/year), though absolute rates of decline varied. Another study also

| Study ID        | Sample Size (n) | Absolute mean decade-specific FEV <sub>1</sub> function decline rates (ml/year) |         |       |        |        |
|-----------------|-----------------|---------------------------------------------------------------------------------|---------|-------|--------|--------|
|                 |                 | Baseline age (years)                                                            |         |       |        |        |
|                 |                 | 30-39                                                                           | 40-49   | 50-59 | 60-69  | 70-79  |
| Burchfiel 1995* | Male (1248)     |                                                                                 | -19.5** | -21.6 | -25.0  |        |
| Burrows 1986    | Male (158)      | +2.83                                                                           | -3.01   | -8.85 | -14.69 | -20.53 |
|                 | Female (308)    | +2.73                                                                           | -2.51   | -7.76 | -13.01 | -18.26 |
| Pearson 1998    | Female (82)     | -23.8                                                                           | -33.4   | -30   | -23.4  | -25.8  |
|                 | Male (91)       | -34                                                                             | -34     | -34   | -34    | -34    |

reported that the rate of decline may be non-linear in multiple regression models of

1  
2 FEV<sub>1</sub> and FVC decline (where age squared was also a statistically significant  
3  
4  
5 variable).<sup>34</sup>  
6  
7  
8  
9  
10

### 11 12 **Table 3. Age-specific lung function decline by decade of age as reported in four cohorts** 13

14  
15 \*Estimates adjust for covariates including height and age

16 \*\*Includes participants 45-49.

17 The estimates from Burrows were derived from formulae modelling change in FEV<sub>1</sub> with age. See  
18 Supplementary File 3 for calculations.  
19

20 Two studies examined lung function change within age brackets that did not conform to  
21

22  
23 our decade-specific analysis. Bartholomew 1998<sup>21</sup> reported greater decline rates in  
24

25  
26 never smokers aged above 45 years (females: -30.7ml/year, males -45.8ml/year)  
27

28  
29 compared to those aged below 45 years (females: -24.3ml/year, males: -36.8ml/year).  
30

31  
32 Lange 1998<sup>25</sup> compared decline rates in both male and female non-smokers in 20-year  
33

34  
35 age groups. Females aged 60-79 years had the greatest decline rates (-31.7 ±  
36

37  
38 2.1ml/year) compared to the 40-59 age group (-17.7 ± 1.4ml/year) and the 20-39 age  
39

40  
41 group which reported an increase of 5.0 ± 2.7ml/year. Similarly, males aged 60-79  
42

43  
44 years had the greatest decline rates (-37.1 ± 3.7ml/year) compared to the 40-59 year  
45

46  
47 age group (-24.2 ± 2.6ml/year) and the 20-39 year age group (-4.6 ± 4.2ml/year).  
48  
49  
50  
51  
52  
53  
54  
55  
56  
57  
58  
59  
60

## Overall rates of mortality/symptom/disease development

Few studies reported these outcomes in an initially asymptomatic, non-smoking population. One study (Proctor)<sup>30</sup> reported 85% mortality rate in the elderly cohort (age range 79 – 96) over eight years. Another study (Lange 1998)<sup>25</sup> reported that in their study of non-asthmatics, 364 (2%) patients who did not report having asthma at the beginning of the study, later reported it in follow up. However, this estimate included smokers. One study (Wang)<sup>33</sup> performed their analyses on a highly screened population, meaning they excluded participants from all analyses who developed disease or symptoms during study follow up. No studies reported the rates of lung function change in those who developed disease during the course of the study compared with those who did not.

## Sensitivity analyses

Heterogeneity in study duration was explored in Figure 3. After removing studies with a follow up of less than ten years, the median rate of decline of FEV<sub>1</sub> was 22.4ml/year (Figure 4).

## Predictors of the rate of decline in lung function in people without known lung disease

### *Smoking*

Although smokers were not included in our main analysis, some studies did compare non-smokers and smokers which we report here. The decline rates were compared in non-smokers or former smokers with current smokers in nine studies<sup>21 22 24-27 29 31 35</sup>. In the seven studies measuring FEV<sub>1</sub> decline, current smokers were observed to have a faster rate of decline.<sup>21 22 24-26 31 35</sup> In the three studies measuring FVC, smoking increased FVC decline<sup>21 24 35</sup>. FEV<sub>1</sub>/FVC decline was greater in smokers than nonsmokers in one study<sup>26</sup> and FEV<sub>0.75</sub> in another study<sup>29</sup>.

### *BMI*

Three studies reported the association of BMI with FEV<sub>1</sub> change. In Bartholomew 1998<sup>21</sup>, increased BMI significantly affected FEV<sub>1</sub> decline (p = 0.008 for females; p=0.007 for males). However, an estimate for this association was not provided. In Triebner 2017<sup>32</sup>, obese individuals reported greater declines of FEV<sub>1</sub> (29ml/year) and FVC (25ml/year) compared to individuals with normal BMI (FEV<sub>1</sub> 22ml/year, FVC 10ml/year). In Luoto 2018<sup>35</sup>, having a BMI greater than 35 was significantly associated

1 with a slower decline of FEV<sub>1</sub> (32ml/year compared to 46ml/year, p = 0.04), but it did not  
2  
3  
4  
5 significantly affect FVC decline.  
6  
7

### 8 *Ethnicity*

9  
10  
11 Griffith<sup>24</sup> was the only study that assessed ethnicity, specifically comparing African-  
12  
13  
14  
15  
16 American participants to White participants. We did not include the African-American  
17  
18  
19 cohort in our analysis as only two measurements were performed on this population.  
20  
21  
22  
23 However, FEV<sub>1</sub> and FVC declines were greater in Whites compared to African-  
24  
25  
26 Americans.  
27

### 28 *Systolic blood pressure*

29  
30  
31  
32  
33 Griffith<sup>24</sup> examined the correlation of systolic blood pressure greater than 160mmHg  
34  
35  
36 with FEV<sub>1</sub> and FVC decline and found that declines were on average 5.6ml/year and  
37  
38  
39  
40 10.9ml/year greater respectively (p <0.01).  
41  
42

### 43 *Dust exposure*

44  
45  
46  
47 Liao<sup>26</sup> explored the effects of dust exposure on FEV<sub>1</sub> and FEV<sub>1</sub>/FVC decline.  
48  
49  
50  
51 Participants with more dust exposure experienced a mean FEV<sub>1</sub> decline that was  
52  
53  
54 4.5ml/year greater than participants with less dust exposure (p= 0.007). Dust exposure  
55  
56  
57  
58  
59  
60

1  
2 did not significantly affect FEV<sub>1</sub>/FVC ratio decline, suggesting that FVC declined in  
3  
4  
5 parallel to FEV<sub>1</sub>.  
6  
7

### 8 *Menopausal status*

9  
10  
11  
12 Triebner<sup>32</sup> reported that menopausal status affected the rate of decline, with rates of  
13  
14  
15 FEV<sub>1</sub> decline on average 3.8ml/year greater in peri-menopausal women, and 5.2ml/year  
16  
17  
18 greater in postmenopausal women. FVC decline was 10.2ml/year greater in peri-  
19  
20  
21 menopausal women, and 12.5ml/year greater in post-menopausal women, compared to  
22  
23  
24 pre-menopausal women.  
25  
26  
27  
28  
29  
30  
31  
32

### 33 **Risk of bias**

34  
35  
36 Risk of bias was determined using a modified version of the Newcastle-Ottawa Scale<sup>19</sup>  
37  
38  
39 (Figures 5, 6). No studies received low risk of bias in all domains, but four studies had a  
40  
41  
42 low risk of bias in all but one domain.<sup>23 28 31</sup> Thirteen studies (81%) were graded as  
43  
44  
45 having low risk of bias for representativeness of the population. Six studies (38%) were  
46  
47  
48 judged as low risk of bias on how they ascertained the age of the participants (from  
49  
50  
51 Medicare eligibility lists or health records). Four cohort studies (25%) clearly  
52  
53  
54 demonstrated that pulmonary impairment was not present in participants at the  
55  
56  
57  
58  
59  
60



1 beginning of the study. All studies (100%) used a spirometer to measure lung function  
2  
3  
4  
5 which is a validated objective instrument. All studies (100%) had adequate duration of  
6  
7  
8 follow-up (three years or longer). Eight studies (50%) had a high risk of bias for having  
9  
10  
11  
12 high attrition rates in their studies (>20%).  
13  
14  
15  
16  
17  
18

## 19 DISCUSSION

### 22 Statement of principal findings

23  
24  
25  
26 This systematic review of sixteen prospective cohort studies conducted in thirteen  
27  
28  
29 countries provides a summary of all the available evidence looking at lung function  
30  
31  
32 change with age. Lung function declines with age in normal, asymptomatic adults with  
33  
34  
35 higher rates of decline in absolute lung function parameters in men compared to  
36  
37  
38 women. However, the relative rates of decline from baseline between men and women  
39  
40  
41  
42 do not differ significantly. The decline in absolute and relative lung function parameters  
43  
44  
45 may accelerate with age and is also exacerbated by smoking. We were unable to  
46  
47  
48  
49 compare lung function decline rates of different ethnicities due to insufficient data. There  
50  
51  
52  
53 was a paucity of longitudinal studies that reported changes in FEV<sub>1</sub>/FVC rather than  
54  
55  
56  
57 reporting the two parameters separately.  
58  
59  
60

## Strengths and weaknesses of the study

This systematic review examined all the available primary studies to allow an examination of the consistency of estimates of decline in FEV<sub>1</sub>, FVC, FEV<sub>1</sub>/FVC ratio and PEF. This review particularly focused on older adults; this group is relatively understudied and yet more prone to overdiagnosis and misdiagnosis.<sup>6 8 18</sup> While the majority of current prediction equations of lung function are based on cross-sectional studies<sup>36-39</sup> our review searched for longitudinal studies as they change in lung function may provide a complement to measurement at one time point in predicting future lung function.<sup>37</sup> Our review included participants who were ageing normally, but may have had non-pulmonary co-morbidities such as hypertension and diabetes mellitus. This enabled us to investigate a population that was more representative of a normal ageing population.

Our review has some limitations. We did not have access to unpublished individual participant data to allow calculation of FEV<sub>1</sub>/FVC for the majority of studies, where this were not reported. Five studies separately measured changes in both FEV<sub>1</sub> and FVC,

1  
2 however is difficult to conclude whether the rate of decline in FEV<sub>1</sub> and FVC is  
3  
4  
5 proportional. Out of the five studies that reported both FEV<sub>1</sub> and FVC decline, two  
6  
7  
8 studies<sup>32</sup> demonstrated that FEV<sub>1</sub> declines faster than FVC, but in the three remaining  
9  
10  
11 studies<sup>20 21 24</sup>, the FVC declined at a faster rate (See Table 2). Longitudinal studies that  
12  
13  
14 specifically measure the FEV<sub>1</sub>/FVC would provide the most reliable measure of this  
15  
16  
17 decline. Individual patient data would also allow a more robust analysis of changes in  
18  
19  
20 lung function between individuals in the studies.  
21  
22  
23  
24  
25  
26  
27  
28  
29

30 We were unable to pool the results due to significant heterogeneity across the  
31  
32  
33 populations. This review's findings are also limited by the quality of the included studies,  
34  
35  
36 all of which were judged moderate or low quality. Since this review is based on limited  
37  
38  
39 populations, the findings may not be generalisable to all individuals, especially those of  
40  
41  
42 non-Caucasian ethnicities or from less economically developed countries where  
43  
44  
45 smoking and air pollution may be more prevalent for example. The review's findings  
46  
47  
48 may underestimate lung function decline among asymptomatic people, as volunteer  
49  
50  
51 bias may be present with cohort studies where healthier individuals may be more likely  
52  
53  
54 to participate. Our study aimed to examine the rate of lung function change in the  
55  
56  
57  
58  
59  
60

1 elderly, however the majority of included studies did not focus on this age group. COPD  
2  
3  
4  
5 misdiagnosis particularly affects those older than 80 years of age, therefore more  
6  
7  
8  
9 studies are required in the elderly.

10  
11  
12  
13  
14  
15 Our review did not consider the extent of short term within-person variation, or “noise”,  
16  
17  
18  
19 in lung function measurements, which is likely to be considerable.<sup>40 41</sup> Any observed  
20  
21  
22  
23 change in measurement is a combination of the true change, or “signal”, and the  
24  
25  
26  
27 random background “noise”. The clinical utility of monitoring lung function to decide  
28  
29  
30 whether or not COPD is present, is in part determined by the ratio of signal to noise in  
31  
32  
33 the measurements.<sup>42</sup> Changes in measured lung function over a longer period of time  
34  
35  
36  
37 may be more likely to indicate some true change rather than just background noise<sup>43</sup>,  
38  
39  
40 therefore we specified in our inclusion criteria that eligible studies should measure lung  
41  
42  
43  
44 function on a minimum of three occasions.

45  
46  
47 We observed substantial heterogeneity across all of the included studies and results.

48  
49  
50 This may be due to inherent differences within the populations studied (including  
51  
52  
53  
54 distribution of ages, proportion of men vs women and ethnicities) or the duration of  
55  
56  
57  
58 follow up, or that decline in normal healthy people may vary across individuals without  
59  
60

1 causing disease. We explored differences in duration of follow-up as a potential source  
2  
3  
4  
5 of heterogeneity in a sensitivity analysis excluding studies with less than ten years of  
6  
7  
8 follow up, but found that this did not change the median estimate substantially.  
9

10  
11  
12  
13  
14  
15 Quality of spirometry, as well as properly maintained and calibrated equipment, causing  
16  
17  
18 measurement error and contributing to the “noise” in measurement discussed above, is  
19  
20  
21  
22 likely to have contributed to variation in the results. Only nine of the included studies  
23  
24  
25 specifically reported that the spirometers used in their studies were calibrated and the  
26  
27  
28 measurements had to be acceptable and reproducible, following the American Thoracic  
29  
30  
31  
32 Society guidelines on the standardization of spirometry.<sup>44</sup> Two studies used peak flow  
33  
34  
35 meters to measure PEF. These instruments are well known to vary in consistency and  
36  
37  
38 accuracy. Maselko et al, used a Mini-Wright meter, but the second study by Proctor et  
39  
40  
41  
42 al, did not specify which peak flow meter they used.  
43  
44  
45  
46  
47  
48  
49

50 The majority of studies specified that they excluded patients with known disease or  
51  
52  
53 symptoms at the commencement of the study. However most of the studies did not  
54  
55  
56  
57 report whether any of the participants in their study sample developed symptoms or  
58  
59

1  
2 respiratory disease in the course of follow-up. Thus, undiagnosed COPD or other  
3  
4  
5 respiratory, cardiac, renal or other diseases that cause decline in lung function, may  
6  
7  
8 have contributed to heterogeneity in the results.  
9

10  
11  
12  
13  
14  
15 Variation within the results may be also explained by the “horse-racing effect”, where an  
16  
17 initially low FEV<sub>1</sub> measurement may reflect a greater loss of function in the preceding  
18  
19 years and hence predicts faster decline in subsequent years (just as the position of the  
20  
21 horse in halfway through the race is related to its speed in the early part of the race and  
22  
23 hence speed for the final part of the race).<sup>45 46</sup> Regression to the mean, due to inclusion  
24  
25 of people with randomly high (or low) measured lung function in the primary studies,  
26  
27 may also have contributed to heterogeneity of the results.<sup>47</sup> A simple way that primary  
28  
29 studies may assess for a horse racing effect, while allowing for regression to the mean,  
30  
31 is by constructing Bland-Altman plots of change vs mean FEV<sub>1</sub> level<sup>48</sup> (or substituting  
32  
33 PEFR for mean FEV<sub>1</sub> as these are highly correlated.<sup>49</sup>)  
34  
35  
36  
37  
38  
39  
40  
41  
42  
43  
44  
45  
46  
47  
48  
49  
50  
51  
52  
53

#### 54 **Comparison with previous research**

55  
56  
57  
58  
59  
60

1 To date, there have been no systematic reviews or meta-analyses examining the rate  
2  
3  
4  
5 of lung function decline with age, to assess the potential impact of the fixed threshold on  
6  
7  
8 COPD misdiagnosis. Cross-sectional studies have compared people diagnosed with  
9  
10  
11 COPD using a fixed threshold and the lower limit of normal (LLN) definition, reporting  
12  
13  
14 that the GOLD criteria leads to misdiagnosis of COPD.<sup>5-8 50</sup> A prospective cohort study  
15  
16  
17  
18 found that the fixed threshold of the GOLD criteria overdiagnosed a large proportion of  
19  
20  
21  
22 elderly people over the age of 70, and the LLN criteria tended to under-diagnose COPD,  
23  
24  
25  
26 when compared to the reference standard which consisted of an expert panel who used  
27  
28  
29  
30 all available diagnostic information including spirometry.<sup>18</sup>  
31  
32  
33  
34  
35  
36  
37  
38  
39  
40  
41  
42  
43  
44  
45  
46  
47  
48  
49  
50  
51  
52  
53  
54  
55  
56  
57  
58  
59  
60

### **Meaning of the study: possible explanations and implications for clinicians and policymakers**

43 This review has found that lung function declines with age in all studied populations.  
44  
45  
46  
47 The rate of decline appears to accelerate with age, and age-specific estimates of FEV<sub>1</sub>,  
48  
49  
50  
51 FVC and FEV<sub>1</sub>/FVC ratio may be more appropriate for diagnosis of COPD than the fixed  
52  
53  
54  
55 threshold currently used across all ages. Currently, prediction equations for calculating  
56  
57  
58  
59  
60 mean lung function values as well as the lower-limit of normal (LLN) for all ages are

1 based on data from cross-sectional studies, however it is argued that this is problematic  
2  
3  
4  
5 as they do not factor in the important dimension of time.<sup>51 52</sup> Spirometers used in practice  
6  
7  
8 commonly derive their reference values from the National Health and Nutrition  
9  
10  
11 Examination Survey (NHANES), a cross-sectional study which was conducted in the  
12  
13  
14  
15 USA between 1988 – 1994. Though the predicted values do reflect a decline in FEV<sub>1</sub>  
16  
17  
18 and FEV<sub>1</sub>/FVC with age, these decline rates may not be as reliable as the estimates  
19  
20  
21 from longitudinal studies included in our review. According to the NHANES III, the  
22  
23  
24  
25 median rate of FEV<sub>1</sub> decline for a Caucasian male of 1.75m aged between 30-80 is  
26  
27  
28  
29 32ml/year and a female with an average height of 1.6m has an FEV<sub>1</sub> that declines a  
30  
31  
32  
33 median of 25ml/year. Both of these estimates are lower than the median FEV<sub>1</sub> decline  
34  
35  
36 of the studies in our review, which was 43.5ml/year and 30.5ml/year for men and  
37  
38  
39 women respectively. Therefore the predicted age-specific lung function used in  
40  
41  
42  
43  
44  
45  
46  
47  
48  
49  
50  
51  
52  
53  
54  
55  
56  
57  
58  
59  
60  
61  
62  
63  
64  
65  
66  
67  
68  
69  
70  
71  
72  
73  
74  
75  
76  
77  
78  
79  
80  
81  
82  
83  
84  
85  
86  
87  
88  
89  
90  
91  
92  
93  
94  
95  
96  
97  
98  
99  
100  
101  
102  
103  
104  
105  
106  
107  
108  
109  
110  
111  
112  
113  
114  
115  
116  
117  
118  
119  
120  
121  
122  
123  
124  
125  
126  
127  
128  
129  
130  
131  
132  
133  
134  
135  
136  
137  
138  
139  
140  
141  
142  
143  
144  
145  
146  
147  
148  
149  
150  
151  
152  
153  
154  
155  
156  
157  
158  
159  
160  
161  
162  
163  
164  
165  
166  
167  
168  
169  
170  
171  
172  
173  
174  
175  
176  
177  
178  
179  
180  
181  
182  
183  
184  
185  
186  
187  
188  
189  
190  
191  
192  
193  
194  
195  
196  
197  
198  
199  
200  
201  
202  
203  
204  
205  
206  
207  
208  
209  
210  
211  
212  
213  
214  
215  
216  
217  
218  
219  
220  
221  
222  
223  
224  
225  
226  
227  
228  
229  
230  
231  
232  
233  
234  
235  
236  
237  
238  
239  
240  
241  
242  
243  
244  
245  
246  
247  
248  
249  
250  
251  
252  
253  
254  
255  
256  
257  
258  
259  
260  
261  
262  
263  
264  
265  
266  
267  
268  
269  
270  
271  
272  
273  
274  
275  
276  
277  
278  
279  
280  
281  
282  
283  
284  
285  
286  
287  
288  
289  
290  
291  
292  
293  
294  
295  
296  
297  
298  
299  
300  
301  
302  
303  
304  
305  
306  
307  
308  
309  
310  
311  
312  
313  
314  
315  
316  
317  
318  
319  
320  
321  
322  
323  
324  
325  
326  
327  
328  
329  
330  
331  
332  
333  
334  
335  
336  
337  
338  
339  
340  
341  
342  
343  
344  
345  
346  
347  
348  
349  
350  
351  
352  
353  
354  
355  
356  
357  
358  
359  
360  
361  
362  
363  
364  
365  
366  
367  
368  
369  
370  
371  
372  
373  
374  
375  
376  
377  
378  
379  
380  
381  
382  
383  
384  
385  
386  
387  
388  
389  
390  
391  
392  
393  
394  
395  
396  
397  
398  
399  
400  
401  
402  
403  
404  
405  
406  
407  
408  
409  
410  
411  
412  
413  
414  
415  
416  
417  
418  
419  
420  
421  
422  
423  
424  
425  
426  
427  
428  
429  
430  
431  
432  
433  
434  
435  
436  
437  
438  
439  
440  
441  
442  
443  
444  
445  
446  
447  
448  
449  
450  
451  
452  
453  
454  
455  
456  
457  
458  
459  
460  
461  
462  
463  
464  
465  
466  
467  
468  
469  
470  
471  
472  
473  
474  
475  
476  
477  
478  
479  
480  
481  
482  
483  
484  
485  
486  
487  
488  
489  
490  
491  
492  
493  
494  
495  
496  
497  
498  
499  
500  
501  
502  
503  
504  
505  
506  
507  
508  
509  
510  
511  
512  
513  
514  
515  
516  
517  
518  
519  
520  
521  
522  
523  
524  
525  
526  
527  
528  
529  
530  
531  
532  
533  
534  
535  
536  
537  
538  
539  
540  
541  
542  
543  
544  
545  
546  
547  
548  
549  
550  
551  
552  
553  
554  
555  
556  
557  
558  
559  
560  
561  
562  
563  
564  
565  
566  
567  
568  
569  
570  
571  
572  
573  
574  
575  
576  
577  
578  
579  
580  
581  
582  
583  
584  
585  
586  
587  
588  
589  
590  
591  
592  
593  
594  
595  
596  
597  
598  
599  
600  
601  
602  
603  
604  
605  
606  
607  
608  
609  
610  
611  
612  
613  
614  
615  
616  
617  
618  
619  
620  
621  
622  
623  
624  
625  
626  
627  
628  
629  
630  
631  
632  
633  
634  
635  
636  
637  
638  
639  
640  
641  
642  
643  
644  
645  
646  
647  
648  
649  
650  
651  
652  
653  
654  
655  
656  
657  
658  
659  
660  
661  
662  
663  
664  
665  
666  
667  
668  
669  
670  
671  
672  
673  
674  
675  
676  
677  
678  
679  
680  
681  
682  
683  
684  
685  
686  
687  
688  
689  
690  
691  
692  
693  
694  
695  
696  
697  
698  
699  
700  
701  
702  
703  
704  
705  
706  
707  
708  
709  
710  
711  
712  
713  
714  
715  
716  
717  
718  
719  
720  
721  
722  
723  
724  
725  
726  
727  
728  
729  
730  
731  
732  
733  
734  
735  
736  
737  
738  
739  
740  
741  
742  
743  
744  
745  
746  
747  
748  
749  
750  
751  
752  
753  
754  
755  
756  
757  
758  
759  
760  
761  
762  
763  
764  
765  
766  
767  
768  
769  
770  
771  
772  
773  
774  
775  
776  
777  
778  
779  
780  
781  
782  
783  
784  
785  
786  
787  
788  
789  
790  
791  
792  
793  
794  
795  
796  
797  
798  
799  
800  
801  
802  
803  
804  
805  
806  
807  
808  
809  
810  
811  
812  
813  
814  
815  
816  
817  
818  
819  
820  
821  
822  
823  
824  
825  
826  
827  
828  
829  
830  
831  
832  
833  
834  
835  
836  
837  
838  
839  
840  
841  
842  
843  
844  
845  
846  
847  
848  
849  
850  
851  
852  
853  
854  
855  
856  
857  
858  
859  
860  
861  
862  
863  
864  
865  
866  
867  
868  
869  
870  
871  
872  
873  
874  
875  
876  
877  
878  
879  
880  
881  
882  
883  
884  
885  
886  
887  
888  
889  
890  
891  
892  
893  
894  
895  
896  
897  
898  
899  
900  
901  
902  
903  
904  
905  
906  
907  
908  
909  
910  
911  
912  
913  
914  
915  
916  
917  
918  
919  
920  
921  
922  
923  
924  
925  
926  
927  
928  
929  
930  
931  
932  
933  
934  
935  
936  
937  
938  
939  
940  
941  
942  
943  
944  
945  
946  
947  
948  
949  
950  
951  
952  
953  
954  
955  
956  
957  
958  
959  
960  
961  
962  
963  
964  
965  
966  
967  
968  
969  
970  
971  
972  
973  
974  
975  
976  
977  
978  
979  
980  
981  
982  
983  
984  
985  
986  
987  
988  
989  
990  
991  
992  
993  
994  
995  
996  
997  
998  
999  
1000



1 Clinicians need to consider whether 'abnormal' spirometry results may in fact represent  
2  
3  
4  
5 normal ageing. This is especially true for making a formal diagnosis of COPD. If a  
6  
7  
8 patient is symptomatic and has airflow obstruction as defined by GOLD criteria, it may  
9  
10  
11  
12 be necessary to consider alternative diagnoses such as a dyspnoea of cardiac origin.  
13

14  
15 One proposal for identifying individuals who are experiencing greater loss of lung  
16  
17 function than expected, is to develop 'decline charts' that predict FEV<sub>1</sub> or FEV<sub>1</sub>/FVC  
18  
19 loss for different ages. This can allow clinicians to monitor lung function over time and  
20  
21  
22 assess whether individuals are tracking along expected decline curves. These would  
23  
24  
25  
26 also need to account for noise in measurement.  
27  
28  
29  
30

31  
32  
33  
34  
35  
36 Future research should focus on conducting long-term longitudinal studies in less-  
37  
38  
39 studied populations, with emphasis on older adults. These studies should examine the  
40  
41  
42 rates of decline in people who eventually become symptomatic or develop disease. This  
43  
44  
45  
46 information can guide clinicians to predict what rate of lung function decline may be a  
47  
48  
49 prognostic indicator of COPD onset and progression. Further well-designed prospective  
50  
51  
52  
53 studies that investigate changes in FEV<sub>1</sub>/FVC may allow for the development of  
54  
55  
56  
57 algorithms that predict individuals' expected lung function over time according to their  
58  
59  
60

1 sex, smoking history, age, BMI and ethnicity. The observed change in lung function  
2  
3  
4  
5 parameters might then be compared to the expected change to help the clinician  
6  
7  
8  
9 determine whether this is extreme enough to warrant diagnosis of disease.  
10  
11  
12  
13  
14

## 15 **ACKNOWLEDGEMENTS**

16  
17  
18  
19 The authors would like to thank Mr. Justin Clark for his assistance with the literature  
20  
21  
22 search, Miss Mari Tashiro for her help with the translation of Japanese studies, Dr Mark  
23  
24  
25 Jones for his advice on statistical analysis and Dr Claudia Dobler for her specialist input  
26  
27  
28  
29 on this review.  
30  
31  
32  
33  
34  
35  
36

## 37 **MANUSCRIPT PREPARATION**

38  
39  
40 This manuscript was prepared in accordance with the PRISMA statement and the Meta-  
41  
42  
43 analyses of Observational Studies in Epidemiology (MOOSE) reporting guidelines.  
44  
45  
46  
47  
48  
49

## 50 **DETAILS OF FUNDING**

51  
52  
53  
54 KJLB and PG have received funding from the Australian National Health and Medical  
55  
56  
57 Research Council (Centre for Research Excellence Grant No 1104136, Australia  
58  
59  
60

1 Fellowship No. 527500 and Program Grant No 633003). The funders had no role in  
2  
3  
4  
5 design and conduct of the study; collection, management, analysis, and interpretation of  
6  
7  
8 the data; and preparation, review, or approval of the manuscript.  
9  
10  
11  
12  
13  
14

## 15 **ETHICAL APPROVAL**

16  
17  
18  
19 Ethical approval was not required for this study.  
20  
21  
22  
23  
24  
25

## 26 **DATA SHARING STATEMENT**

27  
28  
29 No additional data available.  
30  
31  
32  
33  
34  
35

## 36 **CONTRIBUTOR STATEMENT**

37  
38  
39  
40 ETT was involved with devising the review methods, conducting electronic searches,  
41  
42  
43 screening of abstracts, data extraction, data analysis and interpretation, and co-drafting  
44  
45  
46 of the review. MG was involved with devising the review methods, screening of  
47  
48  
49 abstracts, data extraction, data analysis and interpretation and co-drafting the review.  
50  
51  
52  
53  
54 KJLB was involved with devising the review methods, data analysis and interpretation,  
55  
56  
57 and co-drafting the review. SS was involved with devising the review methods, data  
58  
59  
60

1  
2 analysis and interpretation, and co-drafting the review. PG was involved with devising  
3  
4  
5 the review methods, data analysis and interpretation, and co-drafting the review.  
6  
7  
8  
9  
10

## 11 12 **COPYRIGHT / EXCLUSIVE LICENCE FOR PUBLICATION**

13  
14  
15 The Corresponding Author has the right to grant on behalf of all authors and does grant  
16  
17  
18 on behalf of all authors, an exclusive licence (or non exclusive for government  
19  
20  
21 employees) on a worldwide basis to the BMJ Publishing Group Ltd to permit this article  
22  
23  
24 (if accepted) to be published in BMJ editions and any other BMJ PGL products and  
25  
26  
27  
28  
29 sublicences such use and exploit all subsidiary rights, as set out in our licence.  
30  
31  
32  
33  
34  
35

## 36 37 **COMPETING INTERESTS**

38  
39  
40 All authors have completed the ICMJE uniform disclosure form at  
41  
42  
43 [http://www.icmje.org/coi\\_disclosure.pdf](http://www.icmje.org/coi_disclosure.pdf) and declare: no support from any organization  
44  
45  
46  
47 for the submitted work; no financial relationships with any organizations that might have  
48  
49  
50 an interest in the submitted work in the previous three years, no other relationships or  
51  
52  
53  
54 activities that could appear to have influenced the submitted work.  
55  
56  
57  
58  
59  
60

## TRANSPARENCY DECLARATION

The lead author (ETT) affirms that the manuscript is an honest, accurate, and transparent account of the study being reported; that no important aspects of the study have been omitted; and that any discrepancies from the study as originally planned have been explained.

## REFERENCES

1. Chronic obstructive pulmonary disease (COPD): World Health Organization; 2017 [Available from: [http://www.who.int/news-room/fact-sheets/detail/chronic-obstructive-pulmonary-disease-\(copd\)](http://www.who.int/news-room/fact-sheets/detail/chronic-obstructive-pulmonary-disease-(copd)) accessed 5 Aug 2018.
2. Chronic obstructive pulmonary disease in over 16s: diagnosis and management: National Institute for Health and Care Excellence; 2010 [Available from: <https://www.nice.org.uk/guidance/cg101> accessed 5 Aug 2018.
3. The COPD-X Plan: Australian and New Zealand Guidelines for the management of Chronic Obstructive Pulmonary disease 2018: Lung Foundation Australia; 2018 [Available from: [https://copdx.org.au/wp-content/uploads/2018/06/COPDX-V2-53-March-2018\\_2.pdf](https://copdx.org.au/wp-content/uploads/2018/06/COPDX-V2-53-March-2018_2.pdf) accessed 5 Aug 2018.
4. Qaseem A, Wilt T, Weinberger S, et al. Diagnosis and Management of Stable Chronic Obstructive Pulmonary Disease: A Clinical Practice Guideline Update from the American College of Physicians, American College of Chest Physicians, American Thoracic Society, and European Respiratory Society. *Ann Int Med* 2011;155:179-91. doi: 10.7326/0003-4819-155-3-201108020-00008
5. Schermer T, Smeele I, Thoonen B, et al. Current clinical guideline definitions for airflow obstruction leads to substantial overdiagnosis of COPD in primary care. *Eur Respir J* 2008;52(2) doi: 10.1183/09031936.00170307

- 1  
2  
3  
4  
5  
6  
7  
8  
9  
10  
11  
12  
13  
14  
15  
16  
17  
18  
19  
20  
21  
22  
23  
24  
25  
26  
27  
28  
29  
30  
31  
32  
33  
34  
35  
36  
37  
38  
39  
40  
41  
42  
43  
44  
45  
46  
47  
48  
49  
50  
51  
52  
53  
54  
55  
56  
57  
58  
59  
60
6. Swanney M, Ruppel G, Enright P, et al. Using the lower limit of normal for the FEV1/FVC ratio reduces the misclassification of airway obstruction. *Thorax* 2008;63(12):1046-51. doi: 10.1136/thx.2008.098483 [published Online First: Sep 11 2018]
7. Shirtcliffe P, Weatherall M, Marsh S, et al. COPD prevalence in a random population survey: a matter of definition. *Eur Respir J* 2007;30:232-9.
8. Hardie J, Buist A, Vollmer W, et al. Risk of over-diagnosis of COPD in asymptomatic elderly never-smokers. *Eur Respir J* 2002;20:1117-22.
9. Medbø A, Melbye H. Lung function testing in the elderly—Can we still use FEV1/FVC<70% as a criterion of COPD? *Respir Med* 2007;101(6):1097-105. doi: <https://doi.org/10.1016/j.rmed.2006.11.019>
10. Miller M, Levy M. Chronic obstructive pulmonary disease: missed diagnosis versus misdiagnosis. *BMJ* 2015;351:h3021. doi: 10.1136/bmj.h3021
11. Morris J, Temple W, Koski A. Normal Values for The Ratio of One-Second Forced Expiratory Volume to Forced Vital Capacity. *Am Rev Respir Dis* 1973;108(4)
12. Hankinson J, Odencrantzm J, Fedan K. Spirometric Reference Values from a Sample of the General U.S. Population. *Am J Respir Crit Care Med* 1999;159:179-87.
13. Glindmeyer H, Lefante J, McColloster C, et al. Blue-collar normative spirometric values for Caucasian and African-American men and women aged 18 to 65. *Am J Respir Crit Care Med* 1995;151(2) doi: <https://doi.org/10.1164/ajrccm.151.2.7842200>
14. Bossé R, Sparrow D, Garvey A, et al. Cigarette smoking, aging and decline in pulmonary function: A longitudinal study. *Arch Environ Health* 1980;35:247-52.
15. Huhti E, Ikkala J. A 10-year follow-up study of respiratory symptoms and ventilatory function in a middle-age rural population. *Eur J Resp Dis* 1980;61:33-45.
16. Pocket Guide to COPD Diagnosis, Management and Prevention: a guide for health care professionals: Global Initiative for Chronic Obstructive Lung Disease; 2018 [Available from: <https://goldcopd.org/wp-content/uploads/2018/02/WMS-GOLD-2018-Feb-Final-to-print-v2.pdf> accessed 5 Aug 2018.
17. Van Dijk W, Tan W, Li P, et al. Clinical relevance of fixed ratio vs lower limit of normal of FEV1/FVC in COPD: patient-reported outcomes from the CanCOLD cohort. *Ann Fam Med* 2015;13(1):41-8.

- 1  
2 18. Güder G, Brenner S, Angermann C, et al. GOLD or lower limit of normal definition?  
3 a comparison with expert-based diagnosis of chronic obstructive pulmonary  
4 disease in a prospective cohort-study. *Respir Res* 2012;13(1):13. doi:  
5 10.1186/1465-9921-13-13  
6  
7
- 8  
9 19. Wells G, Shea B, O'Connell D, et al. The Newcastle-Ottawa Scale (NOS) for  
10 assessing the quality of nonrandomised studies in meta-analyses: The Ottawa  
11 Hospital; [Available from:  
12 [http://www.ohri.ca/programs/clinical\\_epidemiology/oxford.asp](http://www.ohri.ca/programs/clinical_epidemiology/oxford.asp) accessed 12 Aug  
13 2018.  
14  
15
- 16  
17 20. Ahmadi-Abhari S, Kaptoge S, Luben R, et al. Longitudinal Association of C-Reactive  
18 Protein and Lung Function Over 13 Years: The EPIC-Norfolk Study. *Am J*  
19 *Epidemiol* 2014;179(1):48-56. doi: 10.1093/aje/kwt208  
20  
21
- 22 21. Bartholomew H, Knuiman M. Longitudinal analysis of the effect of smoking  
23 cessation on cardiovascular risk factors in a community sample: the Busselton  
24 Study. *J Cardiovasc Risk* 1998;5:263-71.  
25  
26
- 27 22. Burchfiel C, Marcus E, Curb J, et al. Effects of Smoking and Smoking Cessation on  
28 Longitudinal Decline in Pulmonary Function. *Am J Respir Crit Care Med*  
29 1995;151:1778-85.  
30  
31
- 32 23. Burrows B, Lebowitz M, Camilli A, et al. Longitudinal Changes in Forced Expiratory  
33 Volume in One Second in Adults: Methodologic Considerations and Findings in  
34 Healthy Nonsmokers. *Am Rev Respir Dis* 1986;133:974-80.  
35  
36
- 37 24. Griffith K, Sherrill D, Siegel E, et al. Predictors of Loss of Lung Function in the  
38 Elderly: The Cardiovascular Health Study. *Am J Respir Crit Care Med*  
39 2001;163:61-8.  
40  
41
- 42 25. Lange P, Parner J, Vestbo J, et al. A 15-year follow-up study of ventilatory function  
43 in adults with asthma. *N Engl J Med* 1998;339:1194-200.  
44  
45
- 46 26. Liao S, Lin X, Christiani D. Occupational Exposures and Longitudinal Lung Function  
47 Decline. *Am J Ind Med* 2015;58:14-20.  
48  
49
- 50 27. Maselko J, Kubzansky L, Kawachi I, et al. Religious Service Attendance and Decline  
51 in Pulmonary Function in a High-Functioning Elderly Cohort. *Ann Behav Med*  
52 2006;32(3):245-53.  
53  
54  
55  
56  
57  
58  
59  
60

- 1  
2  
3  
4  
5  
6  
7  
8  
9  
10  
11  
12  
13  
14  
15  
16  
17  
18  
19  
20  
21  
22  
23  
24  
25  
26  
27  
28  
29  
30  
31  
32  
33  
34  
35  
36  
37  
38  
39  
40  
41  
42  
43  
44  
45  
46  
47  
48  
49  
50  
51  
52  
53  
54  
55  
56  
57  
58  
59  
60
28. Pearson J, Kao S, Brant L, et al. Longitudinal Change in Forced Expiratory Volume in Healthy, Non-smoking Men and Women: The Baltimore Longitudinal Study of Aging. *Am J Hum Biol* 1998;10:471-81.
29. Pelkonen M, Notkola I, Tukiainen H, et al. Smoking cessation, decline in pulmonary function and total mortality: a 30 year follow up study among the Finnish cohorts of the Seven Countries Study. *Thorax* 2001;56:703-7.
30. Proctor D, Fauth E, Hoffman L, et al. Longitudinal changes in physical functional performance among the oldest old: insight from a study of Swedish twins. *Aging Clin Exp Res* 2006;18:517-30.
31. Sherman C, Xu X, Speizer F, et al. Longitudinal Lung Function Decline in Subjects with Respiratory Symptoms. *Am Rev Respir Dis* 1992;148:855-9.
32. Triebner K, Matulonga B, Johannessen A, et al. Menopause Is Associated with Accelerated Lung Function Decline. *Am J Respir Crit Care Med* 2017;195(8):1058-65.
33. Wang M, Petsonk E. Repeated Measures of FEV1 Over Six to Twelve Months: What Change is Abnormal? *J Occup Environ Med* 2004;46:591-95.
34. Xu X, Laird N, Dockery D, et al. Age, Period, and Cohort Effects on Pulmonary Function in a 24-Year Longitudinal Study. *Am J Epidemiol* 1995;141:554-66.
35. Luoto J, Pihlsgard M, Wollmer P, et al. Relative and absolute lung function change in a general population aged 60-102 years. *Eur Respir J* 2018 doi: 10.1183/13993003.01812-2017 [published Online First: 2018/12/24]
36. Cherniack R, Raber M. Normal Standards for Ventilatory Function Using an Automated Wedge Spirometer. *Am Rev Respir Dis* 1971;106(1) doi: <https://doi.org/10.1164/arrd.1972.106.1.38>
37. Lung Function Testing: selection of reference values and interpretative strategies. *Am Rev Respir Dis* 1991;144:1202-18.
38. Morris J, Koski A, Johnson L. Spirometric Standards for Healthy Nonsmoking Adults. *Am Rev Respir Dis* 1971;103(1)
39. Paoletti P, Pistelli G, Fazzi P, et al. Reference values for vital capacity and flow-volume curves from a general population study. *Bull Eur Physiopathol Respir* 1986;22:451-9.
40. MacIntyre N. Finding Signals Amidst the Noise in Pulmonary Function Testing. *Chest* 2007;132(2):367-8.



- 1  
2 41. Becklake M, White N. Sources of variation in spirometric measurements. Identifying  
3 the signal and dealing with noise. *Occup Med* 1993;8(2):241-64.
- 4  
5 42. Bell K, Glasziou P, Hayen A, et al. Criteria for monitoring tests were described:  
6 validity, responsiveness, detectability of long-term change, and practicality. *J Clin*  
7 *Epidemiol* 2014;67(2):152-9. doi: 10.1016/j.jclinepi.2013.07.015
- 8  
9 43. Pellegrino R, Viegi G, Brusasco V, et al. Interpretative strategies for lung function  
10 tests. *Eur Respir J* 2005;26:948-68.
- 11  
12 44. Miller M, Hankinson J, Brusasco V, et al. Standardisation of spirometry. *Eur J Resp*  
13 2005;26:319-38.
- 14  
15 45. Fletcher C, Peto R, Tinker C, et al. The natural history of chronic bronchitis and  
16 emphysema. Oxford: Oxford University Press 1970.
- 17  
18 46. Peto R. The horse-racing effect. *Lancet* 1981;2(8244):467-8.
- 19  
20 47. Bland J, Altman D. Statistics Notes: Some examples of regression towards the  
21 mean. *BMJ* 1994;309:780. doi: <https://doi.org/10.1136/bmj.309.6957.780>
- 22  
23 48. Bland J, Altman D. Statistics Notes: Measurement error proportional to the mean.  
24 *BMJ* 1996;313:106. doi: <https://doi.org/10.1136/bmj.313.7049.106>
- 25  
26 49. Gautrin D, D'Aquino L, Gagnon G, et al. Comparison Between Peak Expiratory Flow  
27 Rates (PEFR) and FEV1 in the Monitoring of Asthmatic Subjects at an Outpatient  
28 Clinic. *Chest* 1994;106(5):1419-26.
- 29  
30 50. Wang Y, Xiao W, Ma D, et al. Predicted lower limit of normal reduces  
31 misclassification risk of airflow limitation in asymptomatic elderly never-smokers.  
32 *Chin Med J* 2013;126(18):3486-92.
- 33  
34 51. Brändli O, Schindler C, Künzli N, et al. Lung function in healthy never smoking  
35 adults: reference values and lower limits of normal of a Swiss population. *Thorax*  
36 1996;51:277-83.
- 37  
38 52. Marks G. Are reference equations for spirometry an appropriate criterion for  
39 diagnosing disease and predicting prognosis? *Thorax* 2012;67:85-7. doi:  
40 10.1136/thoraxjnl-2011-200584
- 41  
42 53. NHANES - Normal values: Vitalograph; 2019 [Available from:  
43 <https://vitalograph.com/resources/nhanes-normal-values>] accessed February 9,  
44 2019.

1  
2  
3  
4  
5  
6  
7  
8  
9  
10  
11  
12  
13  
14  
15  
16  
17  
18  
19  
20  
21  
22  
23  
24  
25  
26  
27  
28  
29  
30  
31  
32  
33  
34  
35  
36  
37  
38  
39  
40  
41  
42  
43  
44  
45  
46  
47  
48  
49  
50  
51  
52  
53  
54  
55  
56  
57  
58  
59  
60

For peer review only

## Figure Legends

**Figure 1.** Study flow diagram showing the process for inclusion of prospective RCTs and cohort studies for estimating the rate of lung function decline with age.

**Figure 2.** The rate of FEV<sub>1</sub> decline in thirteen study populations, grouped by sex.

**Figure 3.** The rate of FEV<sub>1</sub> decline in thirteen study populations by years of follow-up. The size of the circle corresponds to individual study sample size.

**Figure 4.** Sensitivity analysis, excluding studies with less than ten years of follow-up. The size of the circle corresponds to individual study sample size.

**Figure 5.** Risk of bias summary for prospective cohort studies estimating the rate of lung function decline with age, assessed using a modified form of the Newcastle-Ottawa Scale.

**Figure 6.** Graphical representation of the risk of bias in prospective cohort studies estimating the rate of lung function decline with age.

**Figure 1.** Study flow diagram showing the process for inclusion of prospective RCTs and cohort studies for estimating the rate of lung function decline with age.

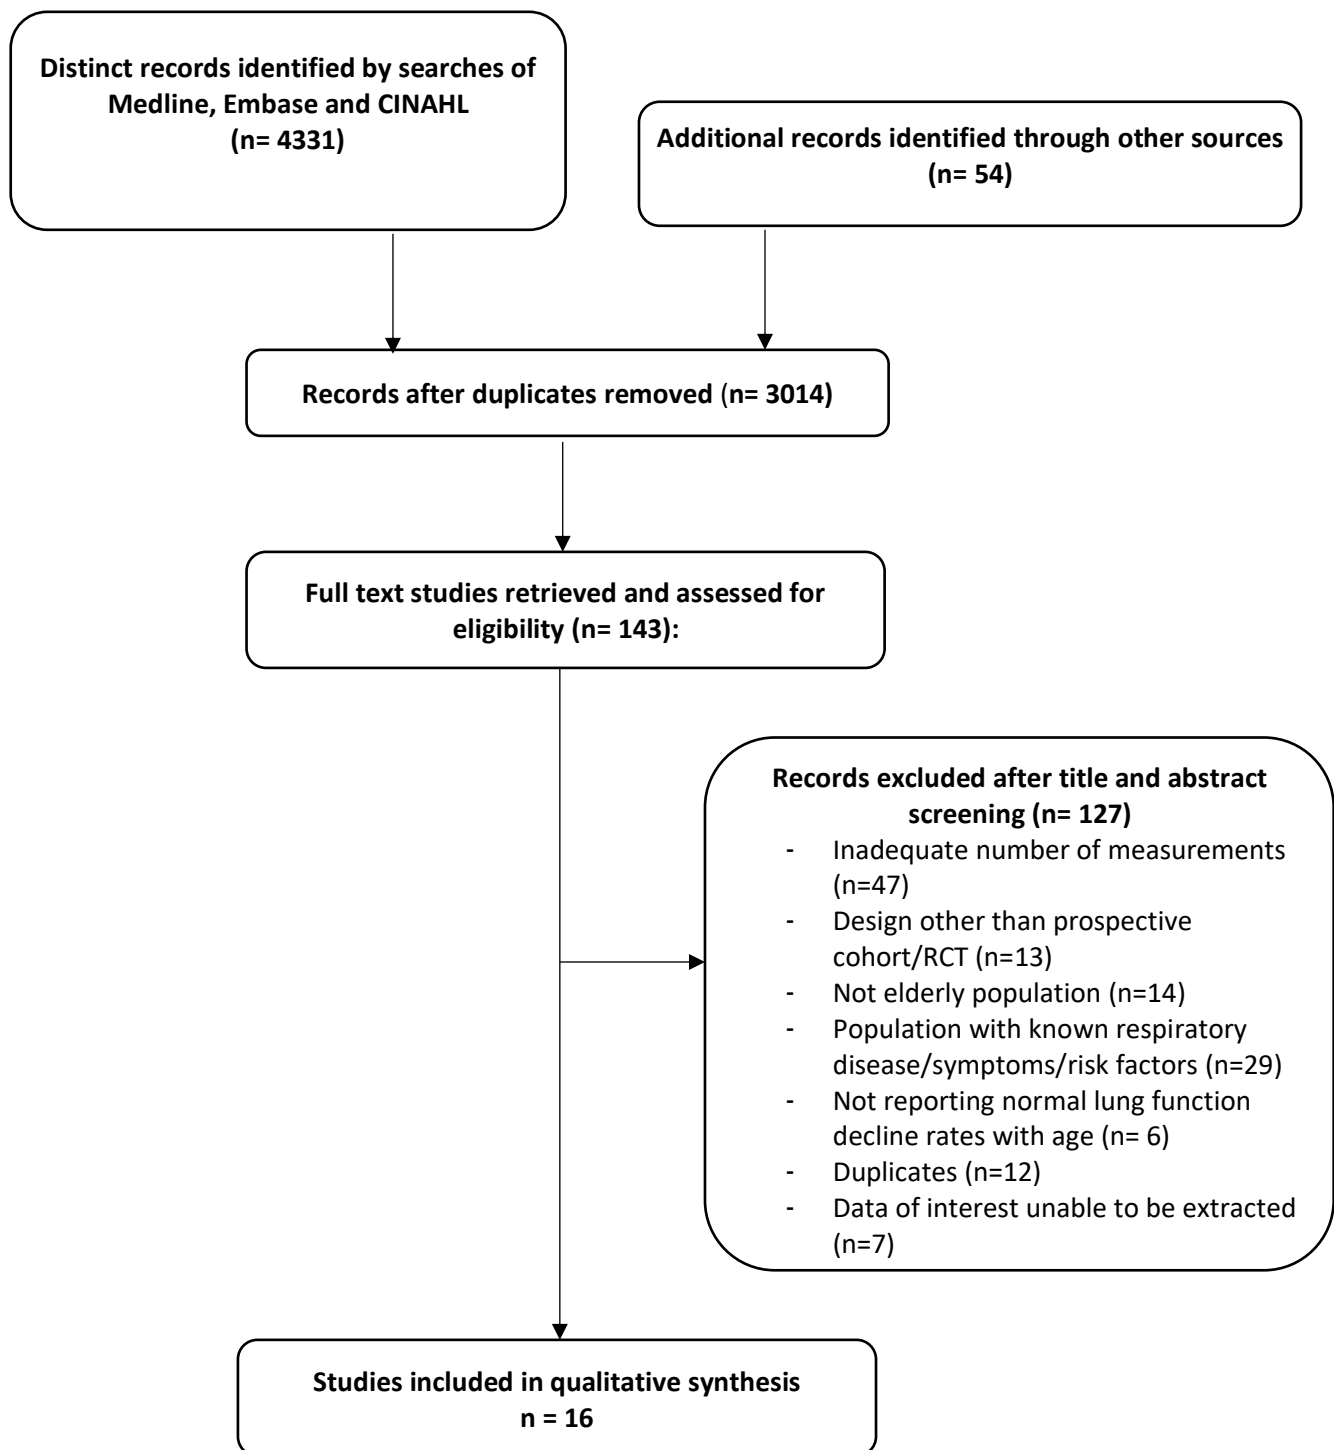

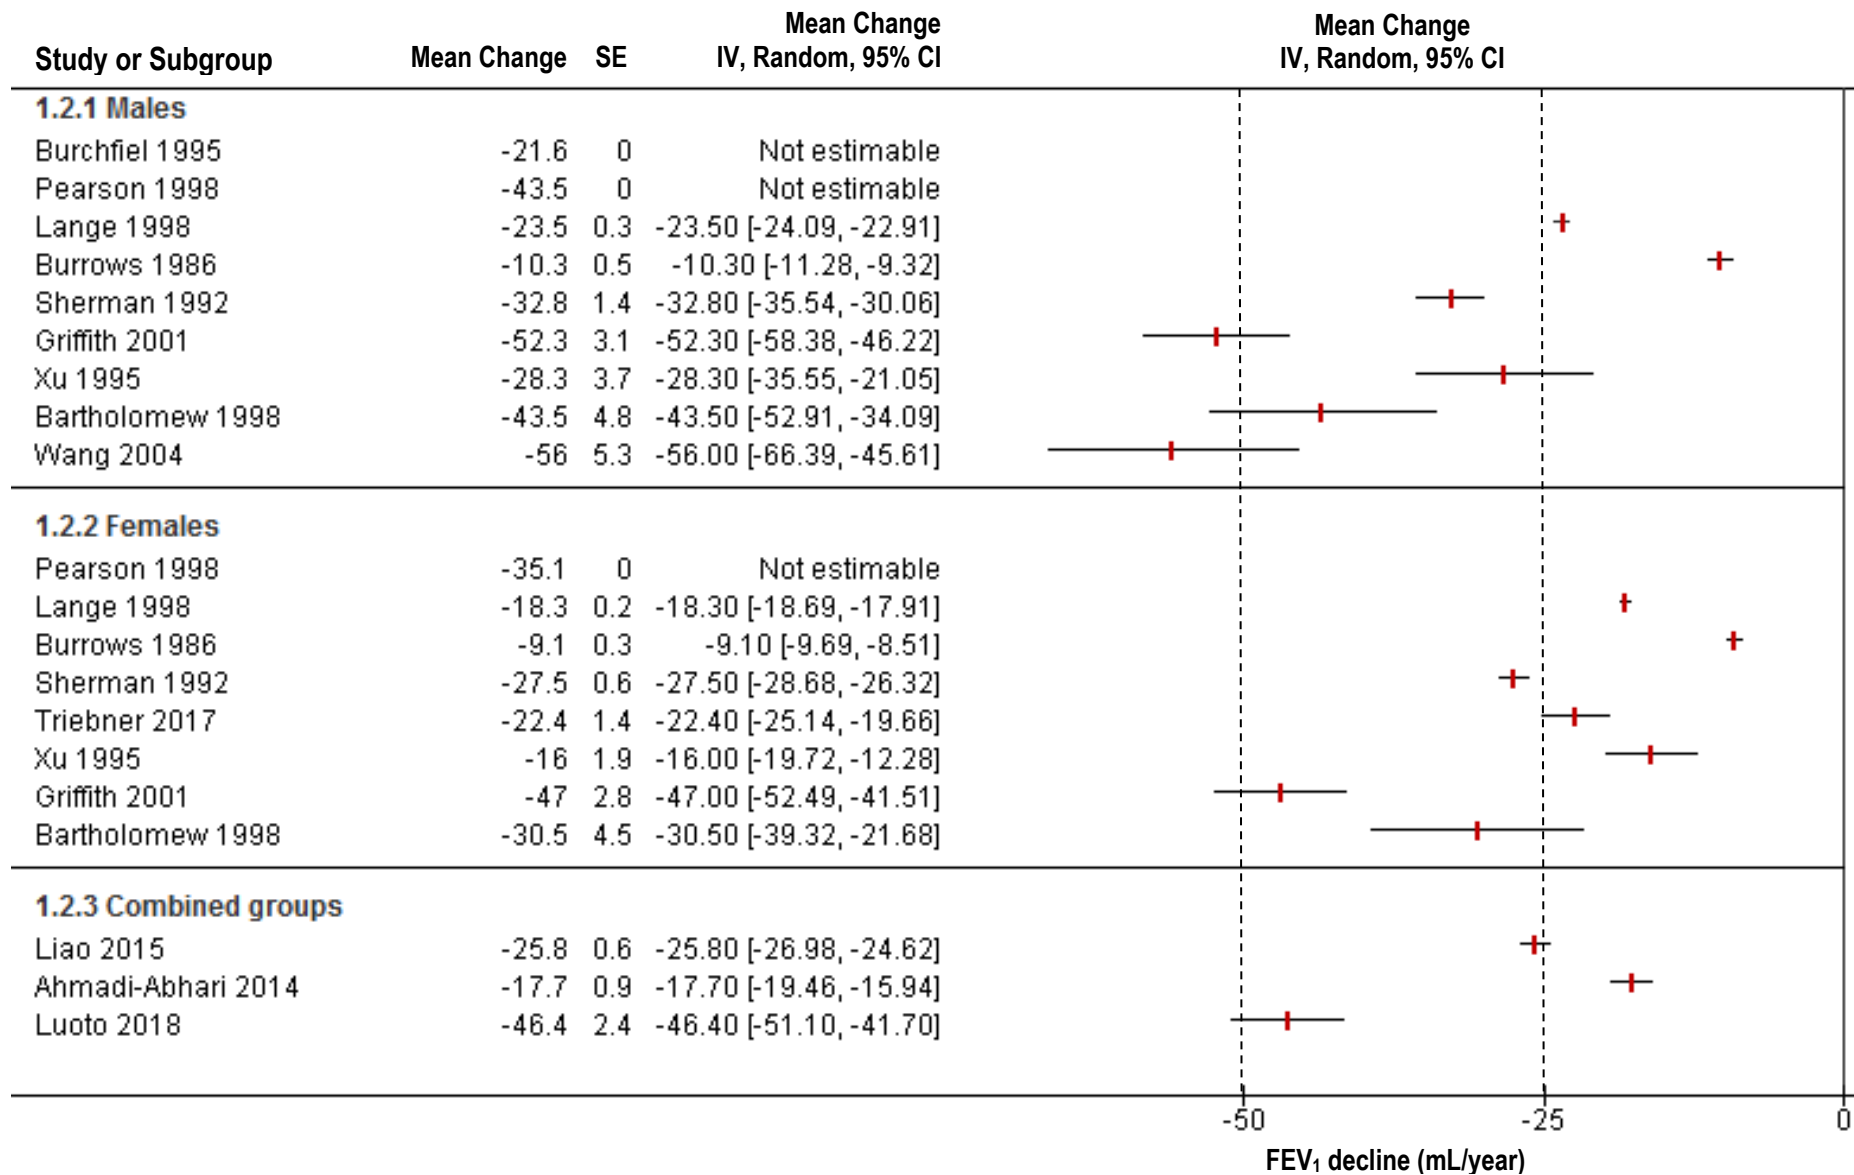

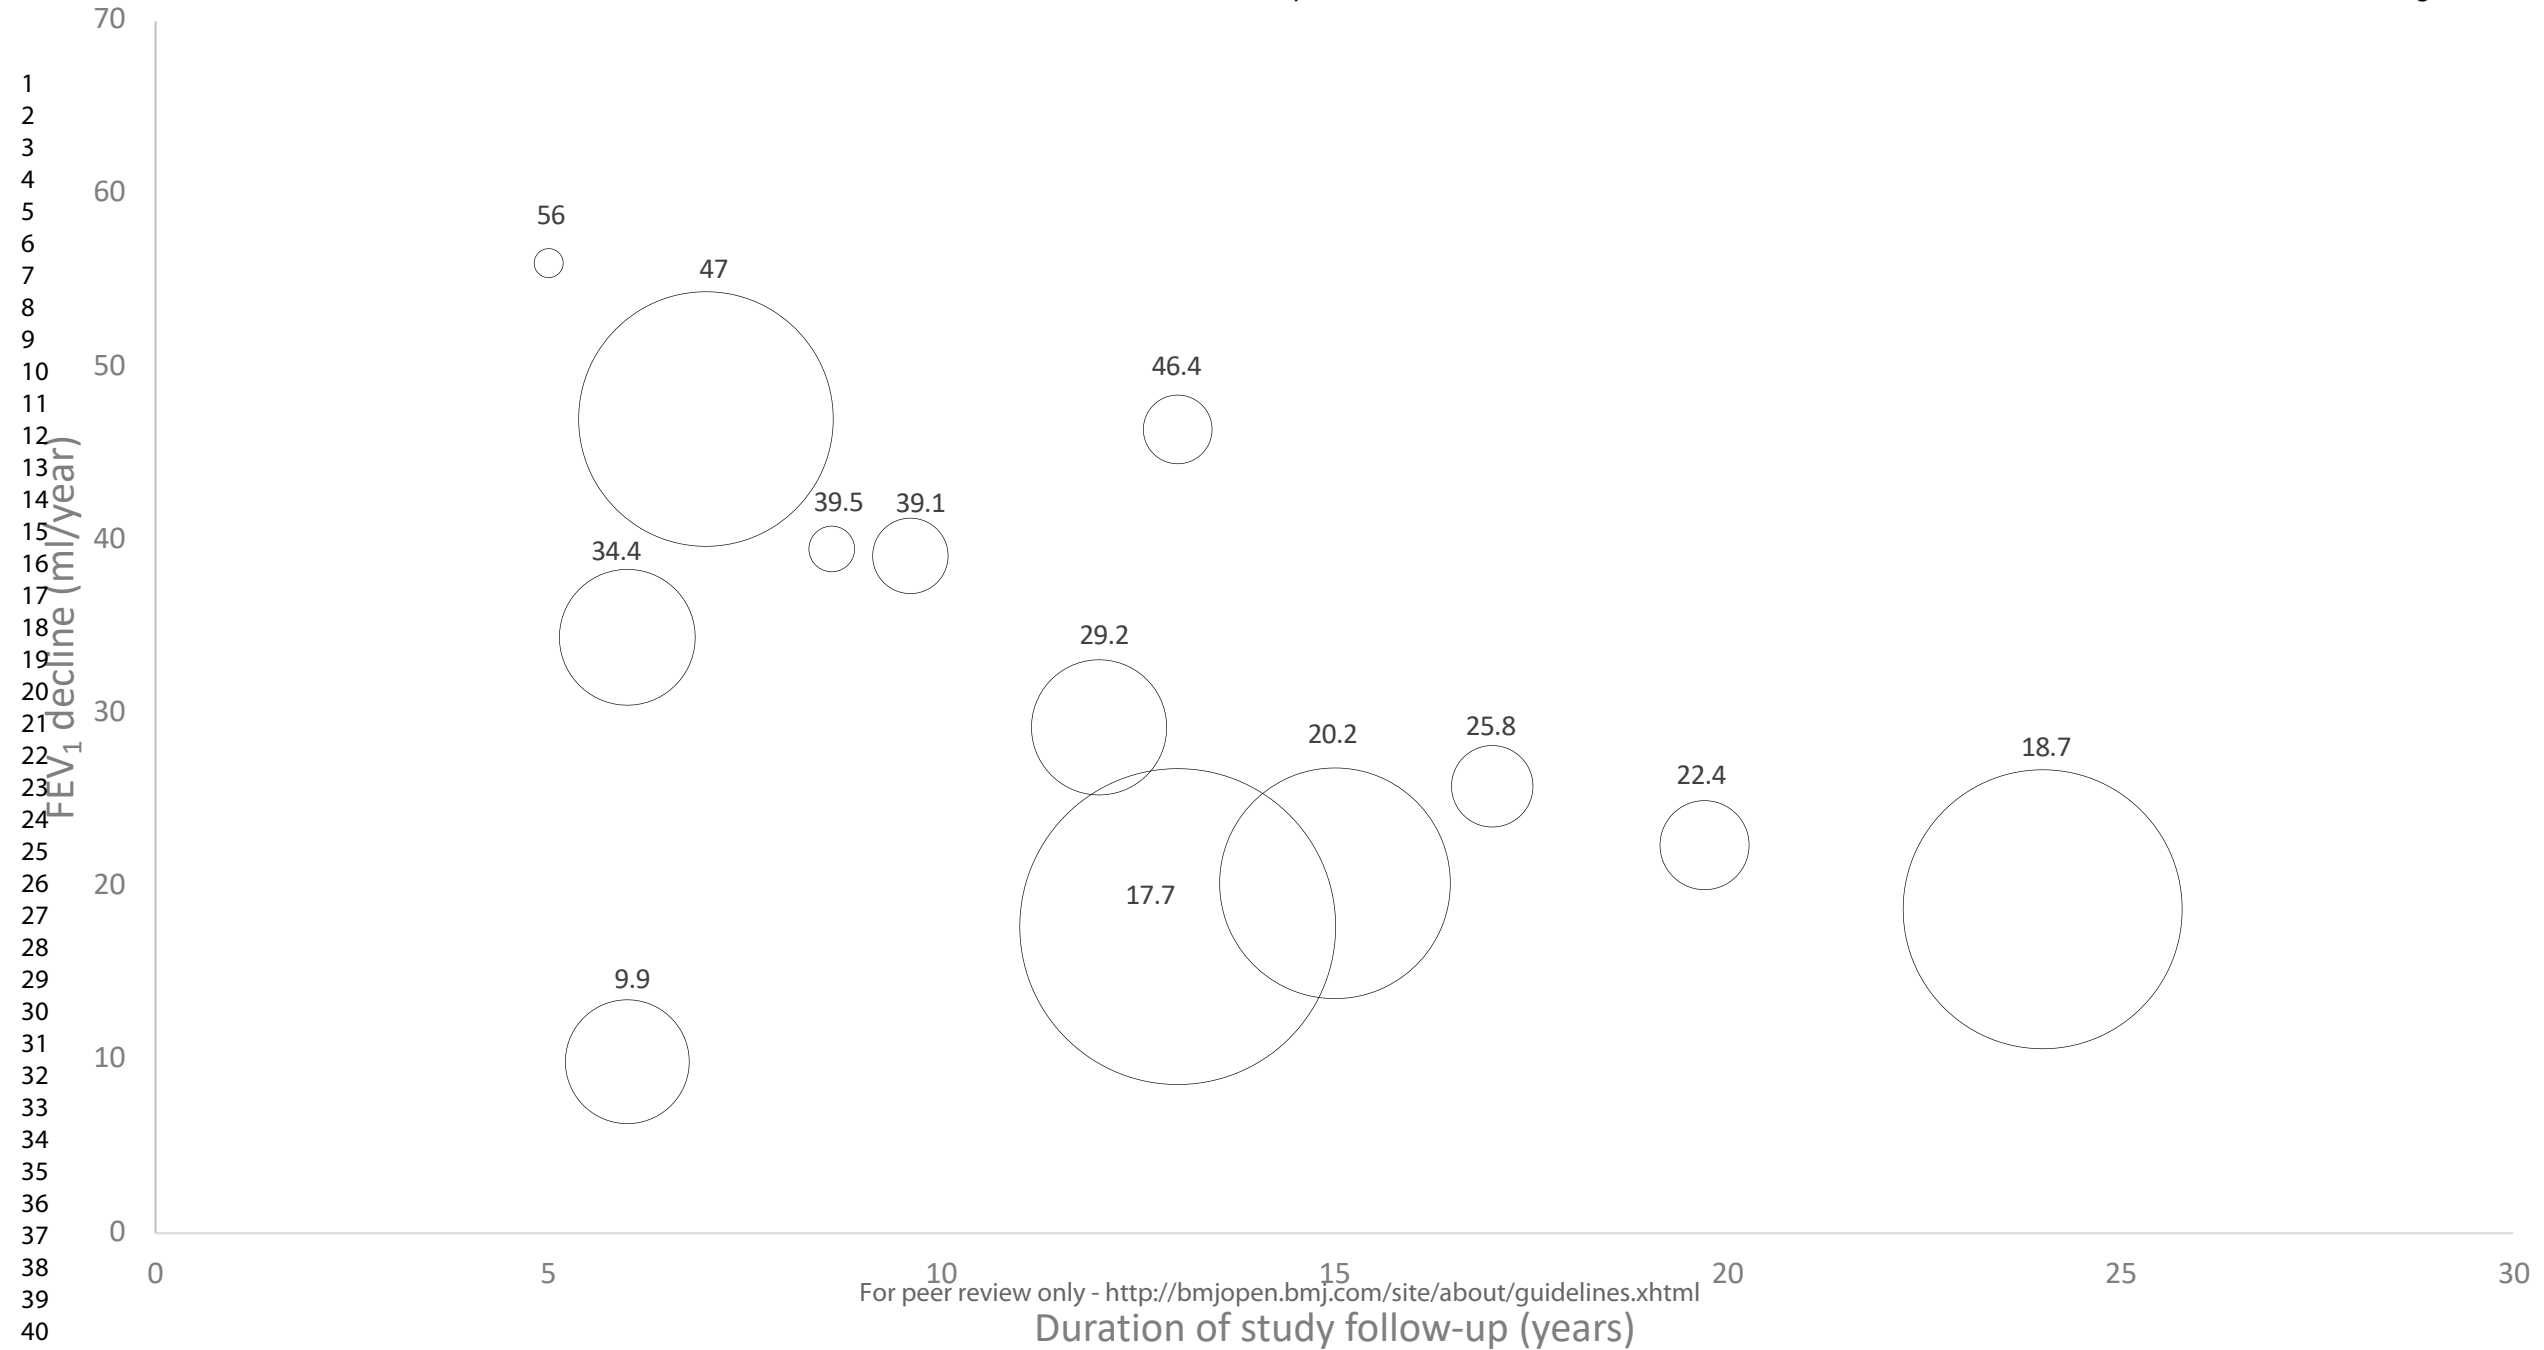

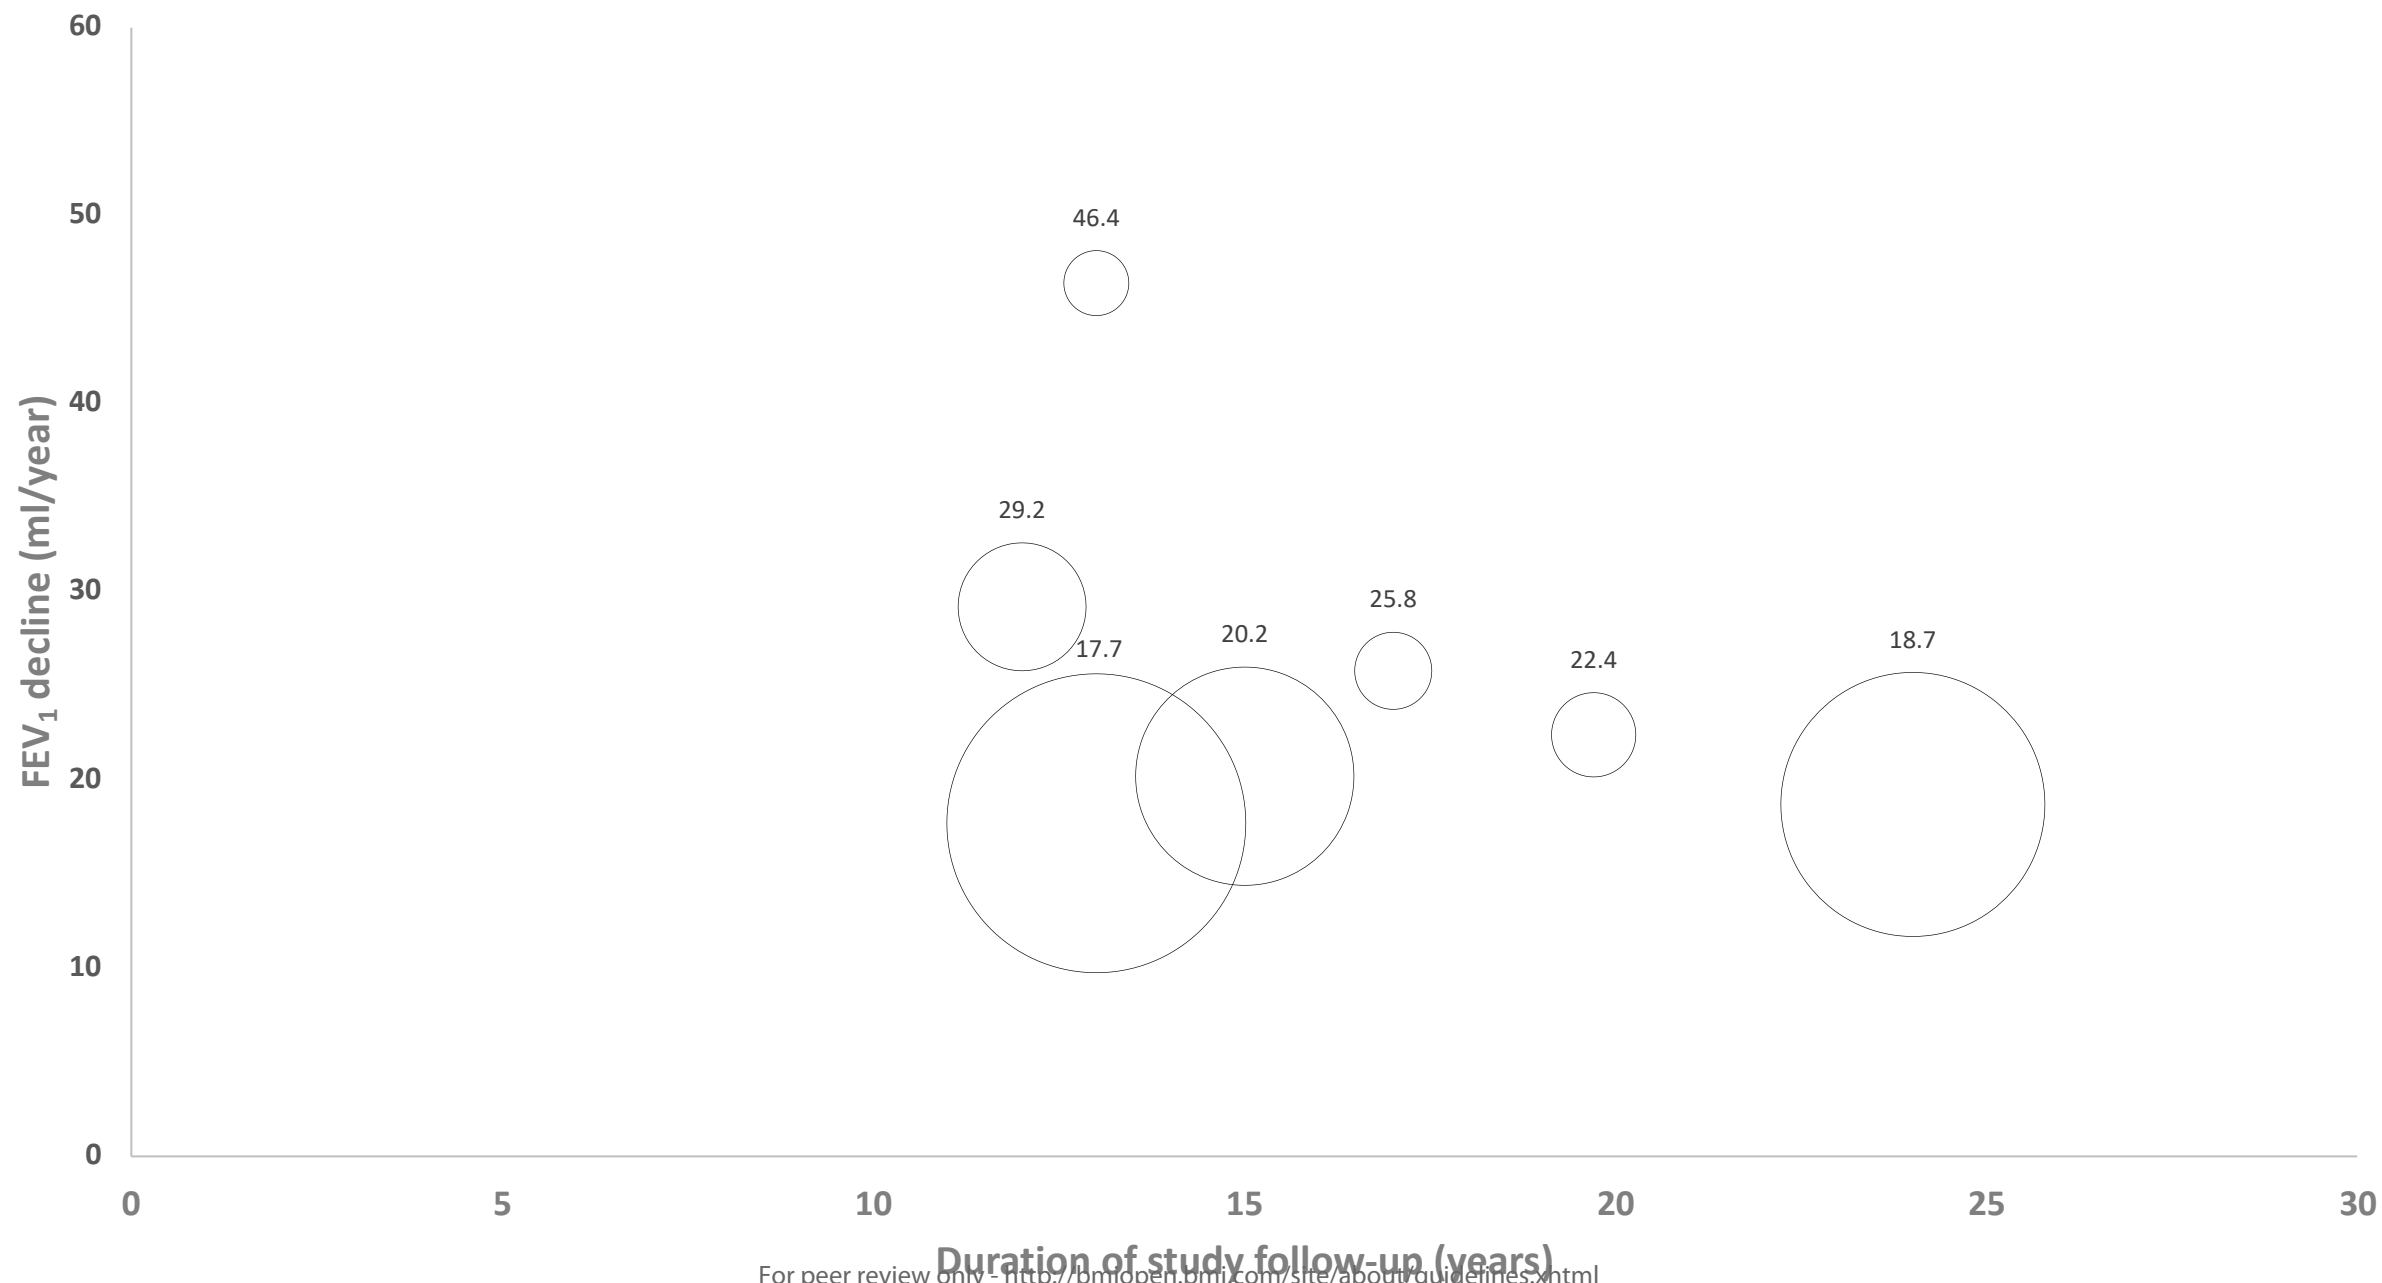

1  
2  
3  
4  
5  
6  
7  
8  
9  
10  
11  
12  
13  
14  
15  
16  
17  
18  
19  
20  
21  
22  
23  
24  
25  
26  
27  
28  
29  
30  
31  
32  
33  
34  
35  
36  
37  
38  
39  
40  
41

1  
2  
3  
4  
5  
6  
7  
8  
9  
10  
11  
12  
13  
14  
15  
16  
17  
18  
19  
20  
21  
22  
23  
24  
25  
26  
27  
28  
29  
30  
31  
32  
33  
34  
35  
36  
37  
38  
39  
40  
41  
42  
43  
44  
45  
46  
47  
48  
49  
50  
51  
52  
53  
54  
55  
56  
57  
58  
59  
60

|                    | Representativeness of the exposed cohort | Ascertainment of exposure | Demonstration that outcome of interest was not present at start of study | Assessment of outcome | Duration of follow up | Adequacy of follow up of cohorts |
|--------------------|------------------------------------------|---------------------------|--------------------------------------------------------------------------|-----------------------|-----------------------|----------------------------------|
| Ahmadi-Abhari 2014 | +                                        | +                         | ?                                                                        | +                     | +                     | -                                |
| Bartholomew 1998   | +                                        | -                         | ?                                                                        | +                     | +                     | ?                                |
| Burchfiel 1995     | -                                        | -                         | -                                                                        | +                     | +                     | -                                |
| Burrows 1986       | +                                        | -                         | +                                                                        | +                     | +                     | +                                |
| Griffith 2001      | +                                        | +                         | -                                                                        | +                     | +                     | ?                                |
| Lange 1998         | +                                        | +                         | -                                                                        | +                     | +                     | -                                |
| Liao 2015          | +                                        | ?                         | -                                                                        | +                     | +                     | ?                                |
| Luoto 2018         | +                                        | +                         | ?                                                                        | +                     | +                     | -                                |
| Maselko 2006       | +                                        | +                         | ?                                                                        | +                     | +                     | -                                |
| Pearson 1998       | +                                        | ?                         | +                                                                        | +                     | +                     | +                                |
| Pelkonen 2001      | +                                        | ?                         | ?                                                                        | +                     | +                     | -                                |
| Proctor 2006       | +                                        | ?                         | ?                                                                        | +                     | +                     | -                                |
| Sherman 1992       | +                                        | +                         | +                                                                        | +                     | +                     | -                                |
| Triebner 2017      | +                                        | -                         | ?                                                                        | +                     | +                     | ?                                |
| Wang 2004          | -                                        | ?                         | +                                                                        | +                     | +                     | ?                                |
| Xu 1995            | -                                        | ?                         | ?                                                                        | +                     | +                     | ?                                |



1  
2  
3  
4  
5  
6  
7  
8  
9  
10  
11  
12  
13  
14  
15  
16  
17  
18  
19  
20  
21  
22  
23  
24  
25  
26  
27  
28  
29  
30  
31  
32  
33  
34  
35  
36  
37  
38  
39  
40  
41  
42  
43  
44  
45  
46  
47  
48  
49  
50  
51  
52  
53  
54  
55  
56  
57  
58  
59  
60

For p

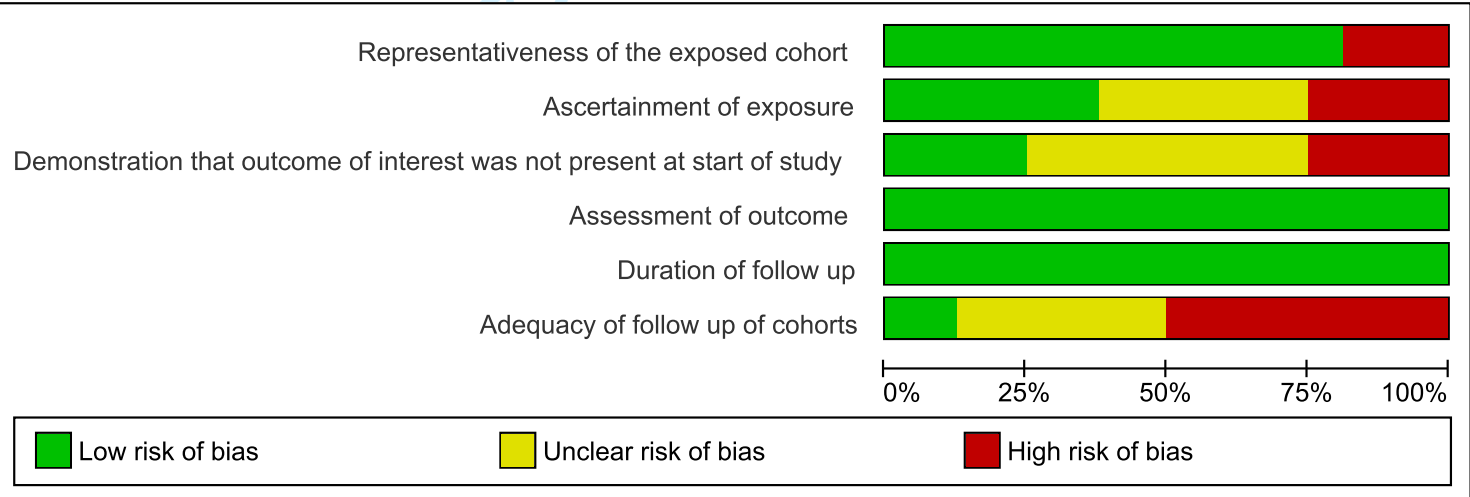

## Supplementary File 1. The rate of normal organ function decline with advancing age: protocol for a systematic review.

### Authors

Elizabeth T Thomas<sup>1</sup>

Michelle Guppy<sup>2,3</sup>

Sharon Straus<sup>4</sup>

Katy Bell<sup>2,5</sup>

Paul Glasziou<sup>2</sup>

### Author affiliations

1. Faculty of Health Sciences and Medicine, Bond University, Robina QLD 4226, Australia
2. Centre for Research in Evidence-based Practice, Bond University, Robina QLD 4226, Australia
3. School of Rural Medicine, University of New England, Armidale NSW 2351, Australia
4. Department of Medicine, University of Toronto, Toronto, Ontario, Canada
5. Sydney School of Public Health, Sydney Medical School, Edward Ford Building (A27), University of Sydney, Sydney, Australia

**Corresponding Author:** Elizabeth T Thomas. Email: elizabeth.thomas@student.bond.edu.au

### Key Words

Normal ageing, organ function, age-related decline

### ABSTRACT

**Background** The unprecedented rise in life expectancy in the last few decades has led to an increasing proportion of elderly people. Elderly individuals present a particularly complex challenge to health care due to their multiple comorbidities, frailty as well as their functional decline. In order to better understand and guide the care of geriatric patients, it is necessary to understand the natural rate of decline of various organ functions, so as not to inappropriately label them as having disease. This protocol is for a systematic review, which aims to calculate the rate of annual decline of lung, liver and pancreatic function as well as bone mineral density.

**Methods** An electronic literature search will be conducted in MEDLINE, EMBASE AND CINAHL from inception. Reference lists of included studies will also be searched for relevant prospective cohort studies and randomized controlled trials, which meet the pre-specified inclusion and exclusion criteria. The article selection and risk of bias of included studies will be determined independently by two reviewers. If possible, a meta-analysis will be conducted to pool estimates on the overall rate as well as the decade-specific rates of decline of the specified organ functions in a healthy aging cohort, and compare these estimates with cohorts that are exposed to risk factors.

**Discussion** This review aims to determine the rate of decline of organ function with age, and determine any predictors of decline. The results from this review will enable clinicians to better differentiate

1  
2  
3 between physiological age-related decline and pathological decline when interpreting laboratory test  
4 results. This will prevent the overdiagnosis of elderly people with diseases that in fact represent normal  
5 ageing.  
6

7 **Systematic review registration** PROSPERO CRD42018087066  
8

## 9 **BACKGROUND**

### 10 **Description of the condition**

11  
12  
13 Advances in modern medicine have resulted in unprecedented rise in life expectancy. The average  
14 person's life expectancy has risen by 5 years in the last fifteen years alone, the fastest rate of growth  
15 since the 1960s<sup>1</sup>. This has led to a rise in the number and proportion of persons aged 65 years and older  
16 with multiple chronic conditions and frailty, posing a complex social and economic challenge to  
17 healthcare systems.  
18

19  
20 Ageing is accompanied by physiological changes in the function of most (if not all) organs and senses.  
21 The physiological functions of some organs, including the lungs and kidneys, have been documented to  
22 reach a peak in early adulthood and then decline thereafter with age<sup>2</sup>. The rates of age-related  
23 functional decline are dependent on a number of factors, including genetics and environmental  
24 factors<sup>3,4</sup>.  
25

26  
27 Measured lung function parameters decrease with age, due to factors such as loss of elasticity,  
28 weakened muscles of respiration and decreased surface area for alveolar gas exchange<sup>6</sup>. Several  
29 longitudinal studies have been performed to monitor and calculate the rate of FEV<sub>1</sub> (Forced expiratory  
30 volume in 1 second) decline, and highlight those who are at risk of developing disease<sup>3,7,8</sup>.  
31

32  
33 The liver also demonstrates measurable changes with age, with liver weight reported to decrease by as  
34 much as 20% after the age of 50 years<sup>2</sup>. Although some studies show that liver function tests do not  
35 change with age<sup>2,9,10</sup>, it is also established that albumin, - which is a marker of synthetic liver function,  
36 decreases with age (though this may in part, be due to other factors such as malnutrition or renal  
37 losses<sup>11</sup>). It has also been shown that the liver metabolises drugs slower in aged cohorts compared to  
38 younger cohorts<sup>2,12,13</sup>.  
39

40  
41  
42 With advancing age, there is a progressive loss in number and function of insulin-producing beta-cells in  
43 the pancreas. This, coupled with increasing systemic insulin resistance in glucose receptors can result in  
44 the development of diabetes mellitus in the elderly<sup>14</sup>. Few studies have demonstrated this by  
45 monitoring healthy individuals for the development of impaired glucose tolerance or fasting glucose<sup>15</sup>.  
46

47  
48 Bone mineral density measurements also exhibits change with age, resulting in an increased risk of  
49 developing osteoporosis, which predisposes older people to minimal trauma fractures. Females have an  
50 accelerated decline of bone mass after the onset of menopause, due to declining oestrogen levels.  
51 Other factors, such as vitamin D, calcium levels, parathyroid gland function, renal function and  
52 gastrointestinal absorption also play a role in maintaining bone mass and skeletal function<sup>16</sup>.  
53  
54  
55  
56  
57  
58  
59  
60

1  
2  
3 Normal ageing may result in changes in laboratory test values and biomarkers, but these changes do not  
4 necessarily represent clinical impairment.<sup>5</sup> Even if laboratory tests show values that lie outside the  
5 reference ranges, organs have functional reserves that cannot easily be measured by standard  
6 laboratory testing. Laboratory test results should not be used as the sole basis for which a diagnosis of  
7 disease is made; rather, these values should be integrated with the patient's clinical symptoms in order  
8 to make a diagnosis.<sup>5</sup> A measured decrease in organ function also may not represent clinically significant  
9 decline, instead demonstrating the normal process of ageing. One explanation for this may be that the  
10 demands of the elderly cohorts' activities of daily living are no longer the same as their younger  
11 counterparts.  
12  
13  
14

### 15 **Why it is important to do this review**

16  
17 Elderly people have increasingly been labelled with conditions such as prediabetes, chronic airways  
18 disease, osteopenia or liver disease as a result of laboratory testing. Although these conditions may  
19 represent a risk of progression to serious disease, which causes premature death, in many cases they  
20 may never progress to symptomatic disease and may even represent an expected level of function at  
21 that age.  
22  
23  
24

25 A commonly-reported example is in chronic kidney disease, which is arbitrarily diagnosed by an eGFR  
26 (estimated glomerular filtration rate) threshold less than 60ml/min/1.73<sup>2</sup> for more than 3 months. There  
27 are no adjustments to this eGFR threshold for age, race or gender. Over 45% of the population over the  
28 age of 70 years have a diagnosis of chronic kidney disease according to this threshold<sup>17,18</sup>. Many of these  
29 individuals, however, never develop kidney failure or end stage renal disease, and have been  
30 inappropriately labeled (overdiagnosed) as having disease<sup>19</sup>.  
31  
32

33 It is important to distinguish pathological aging from physiological decline. Some measures of organ  
34 function (such as eGFR) are not calibrated by age or gender, causing overdiagnosis of healthy individuals  
35 with disease, which may never manifest or cause harm, and subsequent overtreatment. It is therefore  
36 important to clarify what constitutes normal for healthy, aging individuals. To our knowledge, no  
37 systematic review has been done to identify and compare the rates of functional decline across organs,  
38 and whether there are risk factors/predictors that are in common.  
39  
40  
41

### 42 **OBJECTIVE**

43  
44 This review aims to determine the average rate of decline of lung function, liver function, pancreatic  
45 endocrine function and bone mineral density in healthy individuals with advancing age.  
46  
47

### 48 **METHODS**

#### 49 **Eligibility criteria**

#### 50 **Types of studies**

51 This review will consider prospective cohort studies or randomised controlled trials, which employ  
52 longitudinal designs (only if they include a control arm that does not receive treatment) with a minimum  
53  
54  
55  
56  
57  
58  
59

1  
2  
3 duration of three years and three separate measurements. Studies that report the age-related decline of  
4 the specified organ functions will be eligible for inclusion, irrespective of publication status and language  
5 of publication.  
6  
7

### 8 **Types of participants**

9 Studies will be considered eligible for inclusion if they follow a cohort of adults to the age of 65 years or  
10 more. Participants who have a known risk factor, medical illness or pre-disease specific to the outcome  
11 being studied (i.e. participants with diabetes when investigating pancreatic function decline) will be  
12 excluded. Appropriate participants will be included irrespective of sex or ethnicity. Studies including  
13 pregnant women or children will be excluded.  
14  
15

### 16 **Type of exposure**

17 We will include studies involving ageing adults with no known comorbidities. Studies will be eligible for  
18 inclusion if they follow a normal cohort. Studies that only followed cohorts with risk factors or known  
19 exposures and did not compare them to a normal cohort will be excluded. We plan to assess whether  
20 there are certain predictors of decline that organs have in common. Examples of risk factors may  
21 include:  
22  
23

- 24 - Smoking
  - 25 - Symptomatic hypertension
  - 26 - High BMI
  - 27 - Hyperlipidemia
  - 28 - Diabetes mellitus
  - 29 - Alcohol consumption
- 30  
31  
32  
33

### 34 **Types of outcome measures**

35 We will include studies which report annual decline, or repeated measurements of organ function over  
36 time, to at least the age of 65 years. Studies should record a minimum of three measurements of organ  
37 function. Examples of these parameters include:  
38

- 39 - Forced expiratory volume in 1 second (FEV<sub>1</sub>) for lung function
  - 40 - Albumin as a marker of synthetic liver function
  - 41 - Fasting blood sugar levels for pancreatic endocrine function
  - 42 - Bone mineral density
- 43  
44  
45

## 46 **SEARCH METHODS FOR IDENTIFICATION OF STUDIES**

### 47 **Electronic searches**

48 We conducted electronic searches of MEDLINE, EMBASE and CINAHL databases from inception through  
49 to October 2017, using the search strategy at the end of this document. This was developed with the  
50 assistance of an information specialist.  
51  
52  
53

### 54 **Searching other resources**

1  
2  
3 Electronic searches were complemented by manual searching through reference lists of studies that  
4 were identified for potential inclusion as well as backwards and forward searching.  
5

## 6 7 **DATA COLLECTION AND ANALYSIS**

### 8 9 **Selection of studies**

10 Two authors will independently screen titles and abstracts of all studies identified by the searches for  
11 potential inclusion. Prior to commencing screening, a small subset of 50 titles will be screened by the  
12 two reviewers as a calibration exercise to check for >80% agreement. After screening, a calibration  
13 exercise will be conducted screening the full texts of the studies targeting >80% agreement. The  
14 remaining full texts will then be retrieved and reviewed independently by the authors to determine  
15 eligibility for inclusion. Disagreements will be resolved by discussion or with another reviewer. If there  
16 are multiple reports of the same study, the most recent publication with longest length of follow up will  
17 be included.  
18  
19  
20  
21

### 22 23 **Data extraction and management**

24 Two authors will independently extract data from the studies using a data extraction form. This form will  
25 be piloted using ten studies prior to data extraction as a calibration exercise to check for adequate  
26 agreement (>80%) between the reviewers. Data extraction will be performed using Excel and any  
27 disagreements will be resolved by discussion or by another reviewer. Extracted measures will include  
28 setting and year of the study, duration of the study, population size, ethnicity, baseline age, baseline  
29 organ function, organ function measurements, number and frequency of measurements, any known risk  
30 factors or exposures, proportion of those exposed, average length of follow up and loss to follow up. A  
31 random sample of the extraction will also be cross-checked by a third reviewer. All the measured  
32 outcomes (functional parameters) will initially be charted to show how often they are used in studies. A  
33 group of geriatricians and primary care physicians will be recruited from Bond University and Gold Coast  
34 Hospital and Health Service. Using the modified Delphi approach, these clinicians will be asked to  
35 independently rank the organ function parameters that they deem to be the most clinically relevant  
36 marker of organ function. The survey will be performed online. The highest ranked outcomes will then  
37 be included in the data analysis.  
38  
39  
40  
41  
42

### 43 44 **Assessment of risk of bias in included studies**

45 Two authors will independently appraise the quality of the included studies, using the [Newcastle Ottawa](#)  
46 [Scale](#) (NOS) for assessing risk of bias in cohort studies. Disagreements will be resolved by discussion or a  
47 third reviewer. Factors that will be assessed include:

- 48 ● Representativeness of the exposed cohort
- 49 ● Selection of the non-exposed cohort
- 50 ● Ascertainment of exposure
- 51 ● Demonstration that the outcome of interest was not present at start of study
- 52 ● Comparability of cohorts on the basis of design or analysis
- 53 ● Assessment of outcome
- 54 ● Adequate duration of follow up
- 55
- 56
- 57
- 58
- 59
- 60

- Adequate follow up of cohorts
- Other important biases

Risk of bias for randomised controlled trials will be assessed using the Cochrane Risk of Bias tool which assesses the following domains:

- Random sequence generation
- Allocation concealment
- Blinding of participants and personnel
- Blinding of outcome assessors
- Incomplete outcome data
- Selective reporting
- Other biases

### **Measures of treatment effect**

The data will first be extracted and analysed descriptively using graphs, to determine whether it is appropriate to pool the data. If deemed appropriate, RevMan will be used to pool the data. For continuous outcomes the mean difference (MD) (or standardized mean difference if studies use different measuring scales) and corresponding 95% confidence interval (95% CI) will be calculated. The data will be extracted and reported as an annual percentage decline. The overall rates of decline and corresponding confidence intervals will be presented visually in a forest plot. If the data allow, we will also extract and stratify decade-specific decline rates. If this is not possible, then a descriptive synthesis will be presented.

### **Subgroup analysis**

We plan to re-analyse the data by organ function parameter if more than one marker is deemed appropriate as a useful measure of a certain organ's function (e.g. location of bone mineral density measurement). We will compare decline rates of different ethnicities and sex. As well as this we will separately analyse the data of those develop disease during the course of the study and those who had known risk factors. We will also look for birth cohort effects if the data allow (i.e. cohorts who have suffered deprivation early in life may show more functional decline later in life).

### **Dealing with missing data**

If data were missing from studies published within the last 5 years, we plan to contact authors via email to obtain the individual data set.

### **Assessment of heterogeneity**

Statistical heterogeneity may be assessed by calculating the chi squared score, as well as the  $I^2$  statistic. Studies will be judged to have significant heterogeneity if the P value for the chi squared test was  $<0.1$ . If using mixed models, we will report random effects as the measure of heterogeneity. The degree of heterogeneity will be determined by the  $I^2$  as follows (as specified in the Cochrane handbook):

- 0% to 40%: might not be important;
- 30% to 60%: may represent moderate heterogeneity;

- 50% to 90%: may represent substantial heterogeneity;
- 75% to 100%: considerable heterogeneity.

If there is considerable heterogeneity within the studies for the outcome, reasons for heterogeneity will be explored and results will not be pooled.

### **Assessment of reporting biases**

If available, outcomes reported in the protocol of the studies will be judged against the final publication to assess for any reporting bias. If there are any discrepancies, these will be reported. If study protocols are not available, the outcomes listed in the methodology of the study will be compared to the final reported outcomes in the results. Authors will be contacted if there are any missing data or outcomes.

### **Data synthesis**

Where data are sufficiently similar and are thought to be clinically relevant by a group of geriatricians and primary care physicians, we will pool the study estimates of organ function. A random effects model will be used in the meta-analysis to allow for between study differences.

### **Sensitivity analysis**

Sensitivity analyses will be conducted to check whether heterogeneity in the overall outcomes can be explained by either of the following:

- the presence of low quality studies with high risk of bias (assessed as having one or more domains with a high risk of bias according to the NOS).
- duration of the study or time-points of measurement

## **DISCUSSION**

This review aims to provide an estimate of annual organ function decline across various organs that is part of normal aging in people without symptomatic disease. This will enable clinicians to distinguish age-appropriate laboratory test results from values which represent increased risk of disease. It is more reasonable to assess the health of individuals with reference to others in their age cohorts, not in comparison to healthy young individuals. Determining these 'normal' changes with aging will also avoid the psychological consequences of disease-labelling and side effects of unnecessary drug treatment. Researchers will be able to use this data to plan more longitudinal studies in different cohorts and investigate additional factors that affect changes in organ function. Further research will also be required to determine whether it is possible to regain function and if so, up until what point this is possible once a risk factor is removed.

### **ABBREVIATIONS**

**FEV<sub>1</sub>** – Forced expiratory volume in 1 second

**eGFR** - estimated glomerular filtration rate

**NOS**- Newcastle Ottawa Scale



**DECLARATIONS****ETHICS APPROVAL AND CONSENT TO PARTICIPATE**

Not applicable

**CONSENT FOR PUBLICATION**

Not applicable

**AVAILABILITY OF DATA AND MATERIAL**

Not applicable

**COMPETING INTERESTS**

The authors declare that they have no competing interests.

**FUNDING**

PG has received funding from the Australian National Health and Medical Research Council (Australia Fellowship No. 527500 and Program Grant No 633003). The funders had no role in design and conduct of the study; collection, management, analysis, and interpretation of the data; and preparation, review, or approval of the manuscript.

**AUTHORS' CONTRIBUTIONS**

ETT, SS and PG were involved in the conception and design of the review. ETT developed the search strategy. ETT drafted the manuscript, and MG, SS, KB and PG contributed to the drafting of the review protocol. All authors approved the final version of the article.

**ACKNOWLEDGEMENTS**

The authors would like to thank Justin Clark for his assistance with the literature search, as well as Richard Stevens and Ben Feakins for their advice on statistical analysis.

**PUBMED SEARCH STRATEGY**

1. ("forced expiratory volume"[tiab] OR FEV[tiab] OR "forced vital capacity"[tiab] OR FVC[tiab] OR spirometry[Mesh] OR spirometry[tiab] OR "lung function"[tiab] OR "pulmonary function"[tiab] OR "Expiratory Flow"[tiab])  
AND
2. ("Aging/ethnology"[Mesh] OR "Aging/physiology"[Mesh] OR "Age-related"[tiab] OR "Age related"[tiab] OR Function[tiab] OR Healthy[tiab])  
AND
3. (Decline[tiab] OR Declines[tiab] OR Declined[tiab] OR Decrease[tiab] OR Decreased[tiab])  
AND
4. ("Middle Aged"[Mesh] OR "Aged"[Mesh] OR Aged[tiab] OR Elderly[tiab] OR Old[tiab] OR Older[tiab])  
AND
5. ("Longitudinal Studies"[Mesh] OR "Follow-Up Studies"[Mesh] OR Longitudinal[tiab] OR Trend[tiab] OR Trends[tiab] OR Trajectories[tiab] OR Trajectory[tiab] OR "Follow-up"[tiab] OR "Follow up"[tiab] OR "Rate of"[tiab] OR "Rates of"[tiab])  
AND
6. (Cohort[tiab] OR Observational[tiab] OR Prospective[tiab] OR Compared[tiab] OR Investigated[tiab] OR Evaluating[tiab] OR Analysis[tiab] OR Analyzed[tiab] OR Statistics[tiab] OR Data[tiab] OR Baseline[tiab])  
AND
7. (Humans[Mesh] OR Humans[tiab] OR Human[tiab] OR Population[tiab])

## REFERENCES

1. Mathers C, Stevens G, Mahanani W, Ho J, Fat D, Hogan D. WHO methods and data sources for country-level causes of death 2000-2015. Geneva: Department of Information, Evidence and Research WHO; 2017.
2. Boss G, Seegmiller J. Age-Related Physiological Changes and their Clinical Significance. *West J Med* 1981;135:434-40.
3. Aalami O, Fang T, Song H, Nacamuli R. Physiological Features of Aging Persons. *Arch Surg* 2003;138:1068-76.
4. Rodríguez-Rodero S, Fernández-Morera J, Menéndez-Torre E, Calvanese V, Fernández A, Fraga M. Aging Genetics and Aging. *Aging and Disease* 2011;2:186-95. .
5. Vásárhelyi B, Debreczeni L. Lab test findings in the elderly. *J Int Fed Clin Chem* 2017;28:328-32.
6. Navaratnarajah A, Jackson S. The physiology of ageing. *Medicine* 2017;45:6-10.
7. Knudson R, Lebowitz M, Holberg C, Burrows B. Changes in the normal maximal expiratory flow-volume curve with growth and aging. *Am Rev Respir Dis* 1983;127:725-34.
8. Zaugg M, Lucchinetti E. Respiratory Function in the Elderly. *Anesthesiol Clin North America* 2000;18:47-58.
9. Vestal R, McGuire E, Tobin J, al e. Aging and ethanol metabolism *Clin Pharmacol Ther* 1977;21:343-54.
10. Adkins R, Marshall B. Anatomic and physiologic aspects of aging. . In: Adkins R, Scott H, eds. *Surgical Care for the Elderly*. 2nd ed. Philadelphia: Lippincott-Raven Publishers; 1998:xxi531.
11. Van Tongeren J, Cluysenaer O, Lamers C, De Mulder P, Yap S. Causes of hypoalbuminemia. In: Yap S, Majoor C, van Tongeren J, eds. *Clinical Aspects of Albumin*. Dordrecht: Springer; 1978.
12. George J, Byth K, Farrell G. Age but not gender selectively affects expression of individual cytochrome P450 proteins in human liver. . *Biochem Pharmacol* 1995;50:727-30.
13. Loi C, Parker B, Cusack B, Vestal R. Aging and drug interactions. III. Individual and combined effects of cimetidine and cimetidine and ciprofloxacin on theophylline metabolism in healthy male and female nonsmokers. *J Pharmacol Exp Ther* 1997;280:627-37.
14. McConnell J, Buchanan K, Ardill J, Stout R. Glucose tolerance in the elderly: the role of insulin and its receptor. *Eur J Clin Invest* 1982;12:55-61.
15. Meigs J, Muller D, Nathan D, Blake D, R A. The natural history of progression from normal glucose tolerance to type 2 diabetes in the Baltimore Longitudinal Study of Aging. *Diabetes* 2003;52:1475-84.
16. Pathy J, Sinclair A, Morley J, Vellas B. *Pathy's Principles and Practice of Geriatric Medicine*. Oxford: UK: John Wiley & Sons, Ltd; 2012.
17. Levey A, Stevens L, Coresh J. Conceptual model of CKD: applications and implications. *Am J Kidney Dis* 2009;53:S4-16.
18. Stevens L, Viswanathan G, Weiner D. CKD and ESRD in the Elderly: Current Prevalence, Future Projections and Clinical Significance. *Adv Chronic Kidney Dis* 2010;17:293-301.
19. Moynihan R, Glasscock R, Doust J. Chronic kidney disease controversy: how expanding definitions are unnecessarily labelling many people as diseased. *BMJ* 2013;347:f4298.

**Supplementary File 2. Medline Search Strategy, performed 12<sup>th</sup> February 2019**

1. ("forced expiratory volume"[tiab] OR FEV[tiab] OR "forced vital capacity"[tiab] OR FVC[tiab] OR spirometry[Mesh] OR spirometry[tiab] OR "lung function"[tiab] OR "pulmonary function"[tiab] OR "Expiratory Flow"[tiab])  
AND
2. ("Aging/ethnology"[Mesh] OR "Aging/physiology"[Mesh] OR "Age-related"[tiab] OR "Age related"[tiab] OR Function[tiab] OR Healthy[tiab])  
AND
3. (Decline[tiab] OR Declines[tiab] OR Declined[tiab] OR Decrease[tiab] OR Decreased[tiab])  
AND
4. ("Middle Aged"[Mesh] OR "Aged"[Mesh] OR Aged[tiab] OR Elderly[tiab] OR Old[tiab] OR Older[tiab])  
AND
5. ("Longitudinal Studies"[Mesh] OR "Follow-Up Studies"[Mesh] OR Longitudinal[tiab] OR Trend[tiab] OR Trends[tiab] OR Trajectories[tiab] OR Trajectory[tiab] OR "Follow-up"[tiab] OR "Follow up"[tiab] OR "Rate of"[tiab] OR "Rates of"[tiab])  
AND
6. (Cohort[tiab] OR Observational[tiab] OR Prospective[tiab] OR Compared[tiab] OR Investigated[tiab] OR Evaluating[tiab] OR Analysis[tiab] OR Analyzed[tiab] OR Statistics[tiab] OR Data[tiab] OR Baseline[tiab])  
AND
7. (Humans[Mesh] OR Humans[tiab] OR Human[tiab] OR Population[tiab])

### Supplementary File 3. Sample calculations of decline rates for each study

#### Ahmadi-Abhari 2014

Mean FEV1 decline of people with baseline CRP ≤ 10mg/L who are never smokers

| CRP              | n                                                                                                                            | Annual change (multivariable adjusted) |
|------------------|------------------------------------------------------------------------------------------------------------------------------|----------------------------------------|
| ≤ 1              | 3430                                                                                                                         | -17.16                                 |
| 1.1 – 3          | 3012                                                                                                                         | -18.53                                 |
| 3.1 – 10         | 1620                                                                                                                         | =17.15                                 |
| Mean FEV1 change | $= \frac{(3430 \times 17.16) + (3012 \times 18.53) + (1620 \times 17.15)}{(3430 + 3012 + 1620)}$ $= -17.7 \text{ ml / year}$ |                                        |

Mean FVC decline of people with baseline CRP ≤ 10mg/L who are never smokers

| CRP              | n                                                                                                                            | Annual change (multivariable adjusted) |
|------------------|------------------------------------------------------------------------------------------------------------------------------|----------------------------------------|
| ≤ 1              | 3430                                                                                                                         | -31.57                                 |
| 1.2 – 3          | 3012                                                                                                                         | -30.57                                 |
| 3.1 – 10         | 1620                                                                                                                         | -30.87                                 |
| Mean FEV1 change | $= \frac{(3430 \times 31.57) + (3012 \times 30.57) + (1620 \times 30.87)}{(3430 + 3012 + 1620)}$ $= -31.1 \text{ ml / year}$ |                                        |

To calculate the standard deviations each group from the given 95% confidence intervals the following formula was used:

$$SD = \sqrt{n} \times \frac{\text{upper limit} - \text{lower limit}}{3.92}$$

E.g. The standard deviation of FEV1 decline in the CRP ≤ 1 category was calculated as follows:

$$\begin{aligned}
 SD &= \sqrt{3430} \times \frac{19.9 - 14.41}{3.92} \\
 &= \sqrt{3430} \times 1.4 \\
 &= 81.99
 \end{aligned}$$

In this way standard deviations for all of the 3 included groups were calculated for both outcomes

| CRP      | n    | Annual FEV1 change (multivariable adjusted) | Standard deviation |
|----------|------|---------------------------------------------|--------------------|
| ≤ 1      | 3430 | -17.16                                      | 81.99              |
| 1.3 – 3  | 3012 | -18.53                                      | 79.36              |
| 3.1 – 10 | 1620 | -17.15                                      | 69.23              |

| CRP      | n    | Annual FVC change (multivariable adjusted) | Standard deviation |
|----------|------|--------------------------------------------|--------------------|
| ≤ 1      | 3430 | -31.57                                     | 122.99             |
| 1.4 – 3  | 3012 | -30.57                                     | 119.42             |
| 3.1 – 10 | 1620 | -30.87                                     | 104.00             |

The combined standard deviation was calculated using the following formula, available from the Cochrane handbook<sup>1</sup> (where only two groups are combined at a time).

$$\begin{aligned}
 \text{Combined } SD_{\text{Group } 1,2} &= \sqrt{\frac{(n_1 - 1) SD_1^2 + (n_2 - 1) SD_2^2 + \frac{n_1 n_2}{n_1 + n_2} (m_1^2 + m_2^2 - 2(m_1 m_2))}{(n_1 + n_2 - 1)}} \\
 &= \sqrt{\frac{(3430 - 1) 81.99^2 + (3012 - 1) 79.36^2 + \frac{3430 \times 3012}{3430 + 3012} (-17.16^2 + -18.53^2 - 2(-17.16 \times -18.53))}{(3430 + 3012 - 1)}} \\
 &= \frac{(23050972.78 + 18963306.91 + 1603.72(637.83 - 635.95))}{6441} \\
 &= 80.77
 \end{aligned}$$

Then the combined values of Group 1 and 2 are treated as one group as follows

$$SD_1 = 80.77, m_1 = -17.80, n_1 = 6442$$

Group 3 will be assigned to the values of  $SD_2, m_2$  and  $n_2$

$$\begin{aligned}
 \text{Combined } SD_{\text{Group } 1,2,3} &= \sqrt{\frac{(n_1 - 1) SD_1^2 + (n_2 - 1) SD_2^2 + \frac{n_1 n_2}{n_1 + n_2} (m_1^2 + m_2^2 - 2(m_1 m_2))}{(n_1 + n_2 - 1)}} \\
 &= \sqrt{\frac{(6442 - 1) 80.77^2 + (1620 - 1) 69.23^2 + \frac{6442 \times 1620}{6442 + 1620} (-17.80^2 + -17.15^2 - 2(-17.80 \times -17.15))}{(6442 + 1620 - 1)}} \\
 &= \frac{(42019750.07 + 7759531.71 + 1294.47(610.96 - 610.54))}{8061} \\
 &= 78.58
 \end{aligned}$$

The same calculations were carried out for the combined standard deviations of the FVC readings across the 3 CRP groups

**Bartholomew 1998**

See Table 3 – Female never smokers

$$\text{FEV1 6 year change from baseline (all ages)} = -0.178$$

$$\text{Mean FEV1 annual decline} = \frac{0.178}{6}$$

$$= -30.5\text{ml/year}$$

$$\text{FVC 6 year change from baseline (all ages)} = -0.218$$

$$= \frac{0.218}{6}$$

$$= -36.3\text{ml/year}$$

See Table 3 – Male never smokers

$$\text{FEV1 6 year change from baseline (all ages)} = -0.261$$

$$\text{Mean FEV1 annual decline} = \frac{-0.261}{6}$$

$$= -43.5\text{ml/year}$$

$$\text{FVC 6 year change from baseline (all ages)} = -0.283$$

$$= \frac{-0.283}{6}$$

$$= 47.2\text{ml/year}$$

### Burchfiel 1995

Annual FEV1 decline (ml/year) extracted from Table 2

Male never smokers change from Exam 1-3 = -21.6ml/year

### Burrows 1986

Values of FEV1 decline extracted from Figure 3 for both males and females, where in males, height was assumed to be 1.75m and females 1.6m.

Using the formulae provided by the authors to predict  $\Delta\text{FEV1}$ :

Males:  $\Delta\text{FEV1} = 21.82 - 0.109\text{Age} \times \text{Height}^3$

Females:  $\Delta\text{FEV1} = 19.79 - 0.205\text{Age} \times \text{Height}^2$

The relevant values were then derived from the graph and then input into the formulae to produce the following values.

Male

| Age | Height (cubed = 5.36) | FEV1 change |
|-----|-----------------------|-------------|
| 25  | 1.75                  | 7.216*      |
| 30  | 1.75                  | 4.295*      |
| 35  | 1.75                  | 1.374*      |
| 40  | 1.75                  | -1.547      |
| 45  | 1.75                  | -4.468      |
| 50  | 1.75                  | -7.389      |
| 55  | 1.75                  | -10.309     |
| 60  | 1.75                  | -13.23      |
| 65  | 1.75                  | -16.151     |
| 70  | 1.75                  | -19.072     |

Mean decline rate: -10.309ml/yr (SD 6.31), where the \*figures were not used in the overall decline calculation.

Female

| Age | Height (cubed = 5.36) | FEV1 change |
|-----|-----------------------|-------------|
| 25  | 1.6                   | 6.67*       |
| 30  | 1.6                   | 4.046*      |

|    |     |         |
|----|-----|---------|
| 35 | 1.6 | 1.422*  |
| 40 | 1.6 | -1.202  |
| 45 | 1.6 | -3.826  |
| 50 | 1.6 | -6.45   |
| 55 | 1.6 | -9.074  |
| 60 | 1.6 | -11.698 |
| 65 | 1.6 | -14.322 |
| 70 | 1.6 | -16.946 |

Mean decline rate: -9.074 ml/yr (SD 5.668), where the \*figures were not used in the overall decline calculation.

### Griffith 2001

*Rates extracted from Table 4 (random effects model) for FEV1*

Females

Mean -0.047L/year (SE 0.0028)

Males

Mean = -0.047 + (-0.0053)

= -0.0523L/year

SE =  $\sqrt{(0.0028)^2 + (0.0013)^2}$

= 0.0031

*Table 5 for FVC*

Females

Mean -0.0656L/year (SE 0.0038)

Males

Mean = -0.0656 + (-0.0128)

= -0.0784L/year

SE =  $\sqrt{(0.0038)^2 + (0.0019)^2}$

= 0.0042

### Lange 1998

Combined mean (m) of all groups: =  $\frac{(m_1 \times n_1) + (m_2 \times n_2) + (m_3 \times n_3)}{n_1 + n_2 + n_3}$

Using values from Table 3 for non-asthmatic non-smoking women and men. The means, no. of subjects and standard deviations were combined for the 20-39 age group, 40-59 group and 60-79 group.

Females

Combined mean =  $\frac{(433 \times 5.0) + (1471 \times (-17.7)) + (809 \times (-31.7))}{2713}$

= -18.25ml/year

Group 1 and 2 combined standard deviation

For peer review only - <http://bmjopen.bmj.com/site/about/guidelines.xhtml>



$$\begin{aligned}
 \text{Combined SD}_{\text{Group1,2}} &= \sqrt{\frac{(n_1 - 1) SD_1^2 + (n_2 - 1) SD_2^2 + \frac{n_1 n_2}{n_1 + n_2} (m_1^2 + m_2^2 - 2(m_1 m_2))}{(n_1 + n_2 - 1)}} \\
 &= \sqrt{\frac{(433 - 1) 2.7^2 + (1471 - 1) 1.4^2 + \frac{433 \times 1471}{433 + 1471} (5^2 + (-17.7)^2 - 2(5 \times -17.7))}{(433 + 1471 - 1)}} \\
 &= \sqrt{\frac{(432) 2.7^2 + (1470) 1.4^2 + \frac{636943}{1904} (5^2 + 313.29 - 2(-88.5))}{1903}} \\
 &= \sqrt{\frac{3149.28 + 2881.2 + 334.529(338.29 - 177)}{1903}} \\
 &= \sqrt{\frac{6030.48 + 334.529(338.29 - 177)}{1903}} \\
 &= \sqrt{\frac{6030.48 + 53956.18}{1903}} \\
 &= \sqrt{\frac{59986.66}{1903}} \\
 &= 5.6144 \text{ (combined SD of Group 1,2)}
 \end{aligned}$$

Group 1 and 2  $n_1$  1904  $m_1$ -12.538  $SD$  5.6144

Group 3  $n_2$  809  $m_2$  -31.7  $SD$  2.1

$$\begin{aligned}
 \text{Combined SD}_{\text{Group1,2 and 3}} &= \sqrt{\frac{(n_1 - 1) SD_1^2 + (n_2 - 1) SD_2^2 + \frac{n_1 n_2}{n_1 + n_2} (m_1^2 + m_2^2 - 2(m_1 m_2))}{(n_1 + n_2 - 1)}} \\
 &= \sqrt{\frac{(1904 - 1) 5.614^2 + (809 - 1) 2.1^2 + \frac{1904 \times 809}{1904 + 809} ((-12.538)^2 + (-31.7)^2 - 2(397.45))}{(1904 + 809 - 1)}} \\
 &= \sqrt{\frac{(59976.84) + (3563.28) + 567.76(367.19)}{2712}} \\
 &= \sqrt{\frac{63540.12 + 208475.79}{2712}}
 \end{aligned}$$

Combined SD females = 10.015

Males

$$\text{Combined mean} = \frac{(357 \times (-4.6)) + (780 \times (-24.2)) + (455 \times (-37.1))}{1592}$$

$$= -23.49 \text{ ml/year}$$

$$\begin{aligned}
 \text{Combined SD}_{\text{Group1,2}} &= \sqrt{\frac{(n_1 - 1) SD_1^2 + (n_2 - 1) SD_2^2 + \frac{n_1 n_2}{n_1 + n_2} (m_1^2 + m_2^2 - 2(m_1 m_2))}{(n_1 + n_2 - 1)}} \\
 &= \sqrt{\frac{(357 - 1) 4.2^2 + (780 - 1) 2.6^2 + \frac{357 \times 780}{357 + 780} ((-4.6)^2 + (-24.2)^2 - 2(-4.6 \times -24.2))}{(357 + 780 - 1)}} \\
 &= \sqrt{\frac{(356) 4.2^2 + (779) 2.6^2 + 244.91(21.16 + 585.64 - 2(111.32))}{(1136)}} \\
 &= \sqrt{\frac{6279.84 + 5266.04 + 244.91(384.16)}{1136}} \\
 &= \sqrt{\frac{105630.51}{1136}}
 \end{aligned}$$

= 9.643 (combined SD of Group 1,2)

Group 1 and 2       $n_1$  1137       $m_1$ -18.046      SD 9.643

Group 3       $n_2$  455       $m_2$  -31.7      SD 3.7

$$\begin{aligned} \text{Combined SD}_{\text{Group1,2,3}} &= \sqrt{\frac{(n_1 - 1)SD_1^2 + (n_2 - 1)SD_2^2 + \frac{n_1 n_2}{n_1 + n_2}(m_1^2 + m_2^2 - 2(m_1 m_2))}{(n_1 + n_2 - 1)}} \\ &= \sqrt{\frac{(1137 - 1)9.643^2 + (455 - 1)3.7^2 + \frac{1137 \times 455}{1137 + 455}((-18.046)^2 + (-31.7)^2 - 2(572.06))}{(1137 + 455 - 1)}} \\ &= \sqrt{\frac{(105633.74) + (6215.26) + 324.96(186.43)}{1591}} \\ &= \sqrt{\frac{111849 + 60582.29}{1591}} \end{aligned}$$

Combined SD males = 10.41

### Liao 2015

FEV1 and FEV1/FVC decline were extracted from Table III (Linear Mixed Model)

Time dependent estimates (SE)

Years after baseline

FEV1 = 25.8 (0.6)

FEV1/FVC = -0.0029 (0.0001)

### Luoto 2018

Value for absolute FEV<sub>1</sub> decline for never smokers was extracted from Table 3 (Basic model adjusted for age, sex and smoking status)

FEV<sub>1</sub> absolute decline = -46.4

SD calculated from 95% CI using formula:

$$SD = \sqrt{n} \times \frac{\text{upper limit} - \text{lower limit}}{3.92}$$

$$SD = \sqrt{387} \times \frac{-41.7 - -51.2}{3.92}$$

$$SD = 47.7$$

Relative FEV<sub>1</sub> decline was extracted from Table 4 (basic model, non-smoker) = -2.23%/year

SD was calculated using the 95% CI as done for absolute decline values

$$SD = \sqrt{387} \times \frac{-2.00 - -2.46}{3.92}$$

$$SD = 2.3$$

Value for absolute FVC decline for never smokers was extracted from Table 5 (Basic model adjusted for age, sex and smoking status)

FVC absolute decline = -43.7

SD calculated from 95% CI using formula:

$$SD = \sqrt{n} \times \frac{\text{upper limit} - \text{lower limit}}{3.92}$$

$$SD = \sqrt{387} \times \frac{-37.0 - -50.4}{3.92}$$

$$SD = 67.2$$

Relative FVC decline was extracted from Table 6 (basic model, non-smoker) = -1.68%/year

SD was calculated using the 95% CI as done for absolute decline values

$$SD = \sqrt{387} \times \frac{-1.46 - -1.93}{3.92}$$

$$SD = 2.4$$

### Maselko 2006

PEFR decline extracted from Table 3 (never smokers)

Yearly decline

Men

Time (L/min/year) -8.61 (SE 2.3) P<0.01

Women

Time (L/min/year) -8.58 (SE 1.8) P<0.01

### Pearson 1998

Figures of FEV1 decline extracted from Table 1 using the following calculation:

$$\text{Yearly decline} = \frac{FEV_{\text{last visit}} - FEV_{\text{first visit}}}{\text{mean follow up time (years)}}$$

Men

$$\begin{aligned} \text{Yearly decline} &= \frac{3.8L - 4.3L}{11.5 \text{ years}} \\ &= 0.0435L/\text{year} \end{aligned}$$

Women

$$\begin{aligned} \text{Yearly decline} &= \frac{2.6L - 2.8L}{5.7 \text{ years}} \\ &= 0.0351L/\text{year} \end{aligned}$$

### Pelkonen 2001

Figures of 15 year FEV1 decline extracted from Table 1 (Never smokers n=200) = -46.4ml/year (p<0.001)

Figures of 30 year FEV1 decline extracted from Table 1 (Never smokers n=100) = -34.8/year (p<0.001)

### Proctor 2006

1 **PEFR decline calculated from Table 1 using the follow calculation, where EFR is expiratory flow**  
 2 **rate.**

$$3 \text{ } 4 \text{ } 5 \text{ } 6 \text{ } 7 \text{ } 8 \text{ } 9 \text{ } 10 \text{ } 11 \text{ } 12 \text{ } 13 \text{ } 14 \text{ } 15 \text{ } 16 \text{ } 17 \text{ } 18 \text{ } 19 \text{ } 20 \text{ } 21 \text{ } 22 \text{ } 23 \text{ } 24 \text{ } 25 \text{ } 26 \text{ } 27 \text{ } 28 \text{ } 29 \text{ } 30 \text{ } 31 \text{ } 32 \text{ } 33 \text{ } 34 \text{ } 35 \text{ } 36 \text{ } 37 \text{ } 38 \text{ } 39 \text{ } 40 \text{ } 41 \text{ } 42 \text{ } 43 \text{ } 44 \text{ } 45 \text{ } 46 \text{ } 47 \text{ } 48 \text{ } 49 \text{ } 50 \text{ } 51 \text{ } 52 \text{ } 53 \text{ } 54 \text{ } 55 \text{ } 56 \text{ } 57 \text{ } 58 \text{ } 59 \text{ } 60$$

$$\text{Yearly decline} = \frac{EFR_{\text{Year 8}} - EFR_{\text{Year 0}}}{8 \text{ years}}$$

Men

$$\text{Yearly decline} = \frac{298.36 - 390.34}{8 \text{ years}}$$

$$= -11.50\text{L}/\text{min}/\text{year}$$

Women

$$\text{Yearly decline} = \frac{224.62 - 277.20}{8 \text{ years}}$$

$$= -6.57\text{L}/\text{min}/\text{year}$$

### Sherman 1992

FEV1 Slopes extracted from Table 5, specifically never-smokers who experienced no symptoms (mean [SD] ml/year).

Men 32.8 (29.5) ml/year

Women 27.5 (20.4) ml/year

### Triebner 2017

Exact figures of FEV1 and FVC decline for both men and women (never smokers) were obtained by contacting the author.

Graphically represented in Figure 4.

Women

FEV1 decline -22.4ml/year (SD 36.4)

FVC decline -14.1ml/year (SD 42.8)

### Wang 2004

5-year FEV1 slope extracted from Table 1, looking at healthy males.

Mean -56ml/year (SD 45)

### Xu 1995

Estimates of height-adjusted FEV1 for different ages in both male and females and for different birth cohorts were obtained from the graph in Figure 2.

Time related FEV1 changes were calculated as follows:

#### Birth after 1946

$$\text{Men} = \frac{3800\text{ml} - 4100\text{ml}}{40 - 25} = \frac{-300\text{ml}}{40 - 25} = -20\text{ml/year}$$

$$\text{Women} = \frac{2800\text{ml} - 3000\text{ml}}{40 - 25} = \frac{-200\text{ml}}{40 - 25} = -13.3\text{ml/year}$$

#### Cohort 1935 – 1946

$$\text{Men} = \frac{3400\text{ml} - 4100\text{ml}}{50 - 25} = \frac{-600\text{ml}}{25} = -24\text{ml/year}$$

$$\text{Women} = \frac{2500\text{ml} - 2930\text{ml}}{50 - 25} = \frac{-430\text{ml}}{25} = -17.2\text{ml/year}$$

#### Cohort 1923 – 1934

$$\text{Men} = \frac{2780\text{ml} - 3640\text{ml}}{65 - 35} = \frac{-860\text{ml}}{30} = -28.7\text{ml/year}$$

$$\text{Women} = \frac{2050\text{ml} - 2700\text{ml}}{65 - 35} = \frac{-650\text{ml}}{30} = -21.7\text{ml/year}$$

#### Cohort before 1923

$$\text{Men} = \frac{2700\text{ml} - 3300\text{ml}}{65 - 45} = \frac{-600\text{ml}}{20} = -30\text{ml/year}$$

$$\text{Women} = \frac{1970\text{ml} - 2450\text{ml}}{65 - 45} = \frac{-480\text{ml}}{20} = -24\text{ml/year}$$

#### **Reference**

1. The Cochrane Collaboration; 2011 [updated March 2011]. Available from: [https://handbook-5-1.cochrane.org/chapter\\_7/table\\_7\\_7\\_a\\_formulae\\_for\\_combining\\_groups.htm](https://handbook-5-1.cochrane.org/chapter_7/table_7_7_a_formulae_for_combining_groups.htm) accessed August 3rd 2018.



# PRISMA 2009 Checklist

1  
2  
3  
4  
5  
6  
7  
8  
9  
10  
11  
12  
13  
14  
15  
16  
17  
18  
19  
20  
21  
22  
23  
24  
25  
26  
27  
28  
29  
30  
31  
32  
33  
34  
35  
36  
37  
38  
39  
40  
41  
42  
43  
44  
45  
46  
47

| Section/topic                      | #  | Checklist item                                                                                                                                                                                                                                                                                              | Reported on page #            |
|------------------------------------|----|-------------------------------------------------------------------------------------------------------------------------------------------------------------------------------------------------------------------------------------------------------------------------------------------------------------|-------------------------------|
| <b>TITLE</b>                       |    |                                                                                                                                                                                                                                                                                                             |                               |
| Title                              | 1  | Identify the report as a systematic review, meta-analysis, or both.                                                                                                                                                                                                                                         | 1                             |
| <b>ABSTRACT</b>                    |    |                                                                                                                                                                                                                                                                                                             |                               |
| Structured summary                 | 2  | Provide a structured summary including, as applicable: background; objectives; data sources; study eligibility criteria, participants, and interventions; study appraisal and synthesis methods; results; limitations; conclusions and implications of key findings; systematic review registration number. | 2,3                           |
| <b>INTRODUCTION</b>                |    |                                                                                                                                                                                                                                                                                                             |                               |
| Rationale                          | 3  | Describe the rationale for the review in the context of what is already known.                                                                                                                                                                                                                              | 4,5                           |
| Objectives                         | 4  | Provide an explicit statement of questions being addressed with reference to participants, interventions, comparisons, outcomes, and study design (PICOS).                                                                                                                                                  | 5                             |
| <b>METHODS</b>                     |    |                                                                                                                                                                                                                                                                                                             |                               |
| Protocol and registration          | 5  | Indicate if a review protocol exists, if and where it can be accessed (e.g., Web address), and, if available, provide registration information including registration number.                                                                                                                               | 5,<br>Supplementary<br>File 1 |
| Eligibility criteria               | 6  | Specify study characteristics (e.g., PICOS, length of follow-up) and report characteristics (e.g., years considered, language, publication status) used as criteria for eligibility, giving rationale.                                                                                                      | 5,6                           |
| Information sources                | 7  | Describe all information sources (e.g., databases with dates of coverage, contact with study authors to identify additional studies) in the search and date last searched.                                                                                                                                  | 5,6                           |
| Search                             | 8  | Present full electronic search strategy for at least one database, including any limits used, such that it could be repeated.                                                                                                                                                                               | Supplementary<br>File 2       |
| Study selection                    | 9  | State the process for selecting studies (i.e., screening, eligibility, included in systematic review, and, if applicable, included in the meta-analysis).                                                                                                                                                   | 6,7                           |
| Data collection process            | 10 | Describe method of data extraction from reports (e.g., piloted forms, independently, in duplicate) and any processes for obtaining and confirming data from investigators.                                                                                                                                  | 7                             |
| Data items                         | 11 | List and define all variables for which data were sought (e.g., PICOS, funding sources) and any assumptions and simplifications made.                                                                                                                                                                       | 7                             |
| Risk of bias in individual studies | 12 | Describe methods used for assessing risk of bias of individual studies (including specification of whether this was done at the study or outcome level), and how this information is to be used in any data synthesis.                                                                                      | 7,8                           |
| Summary measures                   | 13 | State the principal summary measures (e.g., risk ratio, difference in means).                                                                                                                                                                                                                               | 8,9                           |

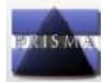

# PRISMA 2009 Checklist

Page 1 of 2

|                      |    |                                                                                                                                                           |     |
|----------------------|----|-----------------------------------------------------------------------------------------------------------------------------------------------------------|-----|
| Synthesis of results | 14 | Describe the methods of handling data and combining results of studies, if done, including measures of consistency (e.g., $I^2$ ) for each meta-analysis. | 8,9 |
|----------------------|----|-----------------------------------------------------------------------------------------------------------------------------------------------------------|-----|

| Section/topic                 | #  | Checklist item                                                                                                                                                                                           | Reported on page #          |
|-------------------------------|----|----------------------------------------------------------------------------------------------------------------------------------------------------------------------------------------------------------|-----------------------------|
| Risk of bias across studies   | 15 | Specify any assessment of risk of bias that may affect the cumulative evidence (e.g., publication bias, selective reporting within studies).                                                             | 7,8                         |
| Additional analyses           | 16 | Describe methods of additional analyses (e.g., sensitivity or subgroup analyses, meta-regression), if done, indicating which were pre-specified.                                                         | 9                           |
| <b>RESULTS</b>                |    |                                                                                                                                                                                                          |                             |
| Study selection               | 17 | Give numbers of studies screened, assessed for eligibility, and included in the review, with reasons for exclusions at each stage, ideally with a flow diagram.                                          | 9, Figure 1                 |
| Study characteristics         | 18 | For each study, present characteristics for which data were extracted (e.g., study size, PICOS, follow-up period) and provide the citations.                                                             | 9, Table 1                  |
| Risk of bias within studies   | 19 | Present data on risk of bias of each study and, if available, any outcome level assessment (see item 12).                                                                                                | 19, Figure 4                |
| Results of individual studies | 20 | For all outcomes considered (benefits or harms), present, for each study: (a) simple summary data for each intervention group (b) effect estimates and confidence intervals, ideally with a forest plot. | 9-19, Table 2,3, Figure 2,3 |
| Synthesis of results          | 21 | Present results of each meta-analysis done, including confidence intervals and measures of consistency.                                                                                                  | N/A                         |
| Risk of bias across studies   | 22 | Present results of any assessment of risk of bias across studies (see Item 15).                                                                                                                          | 19, Figure 5                |
| Additional analysis           | 23 | Give results of additional analyses, if done (e.g., sensitivity or subgroup analyses, meta-regression [see Item 16]).                                                                                    | 16-19, Figure 2, 3B         |
| <b>DISCUSSION</b>             |    |                                                                                                                                                                                                          |                             |
| Summary of evidence           | 24 | Summarize the main findings including the strength of evidence for each main outcome; consider their relevance to key groups (e.g., healthcare providers, users, and policy makers).                     | 20                          |
| Limitations                   | 25 | Discuss limitations at study and outcome level (e.g., risk of bias), and at review-level (e.g., incomplete retrieval of identified research, reporting bias).                                            | 20-23                       |

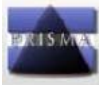

# PRISMA 2009 Checklist

1  
2  
3  
4  
5  
6  
7  
8  
9  
10  
11  
12  
13  
14  
15  
16  
17  
18  
19  
20  
21  
22  
23  
24  
25  
26  
27  
28  
29  
30  
31  
32  
33  
34  
35  
36  
37  
38  
39  
40  
41  
42  
43  
44  
45  
46  
47

|                |    |                                                                                                                                            |       |
|----------------|----|--------------------------------------------------------------------------------------------------------------------------------------------|-------|
| Conclusions    | 26 | Provide a general interpretation of the results in the context of other evidence, and implications for future research.                    | 23-25 |
| <b>FUNDING</b> |    |                                                                                                                                            |       |
| Funding        | 27 | Describe sources of funding for the systematic review and other support (e.g., supply of data); role of funders for the systematic review. | 25,26 |

From: Moher D, Liberati A, Tetzlaff J, Altman DG, The PRISMA Group (2009). Preferred Reporting Items for Systematic Reviews and Meta-Analyses: The PRISMA Statement. PLoS Med 6(7): e1000097. doi:10.1371/journal.pmed1000097

For more information, visit: [www.prisma-statement.org](http://www.prisma-statement.org).

Page 2 of 2
