# Supplementary material for: Rate of normal lung function decline in ageing adults: a systematic review of prospective cohort studies
Source: PubMed Central journal article supplement — BMJ Open. 2019 Jun 27;9(6):e028150. doi: 10.1136/bmjopen-2018-028150 (PMC6597635; doi:10.1136/bmjopen-2018-028150), 2019-06-27
Supplement: bmjopen-2018-028150supp002.pdf [file bmjopen-2018-028150supp002.pdf]

## Supplementary File 2. Medline Search Strategy, performed 12<sup>th</sup> February 2019

1. ("forced expiratory volume"[tiab] OR FEV[tiab] OR "forced vital capacity"[tiab] OR FVC[tiab] OR spirometry[Mesh] OR spirometry[tiab] OR "lung function"[tiab] OR "pulmonary function"[tiab] OR "Expiratory Flow"[tiab])  
AND
2. ("Aging/ethnology"[Mesh] OR "Aging/physiology"[Mesh] OR "Age-related"[tiab] OR "Age related"[tiab] OR Function[tiab] OR Healthy[tiab])  
AND
3. (Decline[tiab] OR Declines[tiab] OR Declined[tiab] OR Decrease[tiab] OR Decreased[tiab])  
AND
4. ("Middle Aged"[Mesh] OR "Aged"[Mesh] OR Aged[tiab] OR Elderly[tiab] OR Old[tiab] OR Older[tiab])  
AND
5. ("Longitudinal Studies"[Mesh] OR "Follow-Up Studies"[Mesh] OR Longitudinal[tiab] OR Trend[tiab] OR Trends[tiab] OR Trajectories[tiab] OR Trajectory[tiab] OR "Follow-up"[tiab] OR "Follow up"[tiab] OR "Rate of"[tiab] OR "Rates of"[tiab])  
AND
6. (Cohort[tiab] OR Observational[tiab] OR Prospective[tiab] OR Compared[tiab] OR Investigated[tiab] OR Evaluating[tiab] OR Analysis[tiab] OR Analyzed[tiab] OR Statistics[tiab] OR Data[tiab] OR Baseline[tiab])  
AND
7. (Humans[Mesh] OR Humans[tiab] OR Human[tiab] OR Population[tiab])
